# Supplementary material
Source: PubMed Central journal article supplement (PMC2971677)

# **C-H Bond Functionalization via Hydride Transfer: Direct Coupling of Unactivated Alkynes and $sp^3$ C-H Bonds Catalyzed by Platinum Tetraiodide**

Paul A. Vadola and Dalibor Sames\*

*Department of Chemistry, Columbia University,*

*3000 Broadway, New York, New York, 10027*

**Supporting Information**

— 7.325

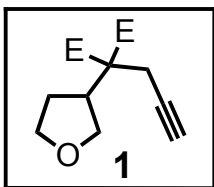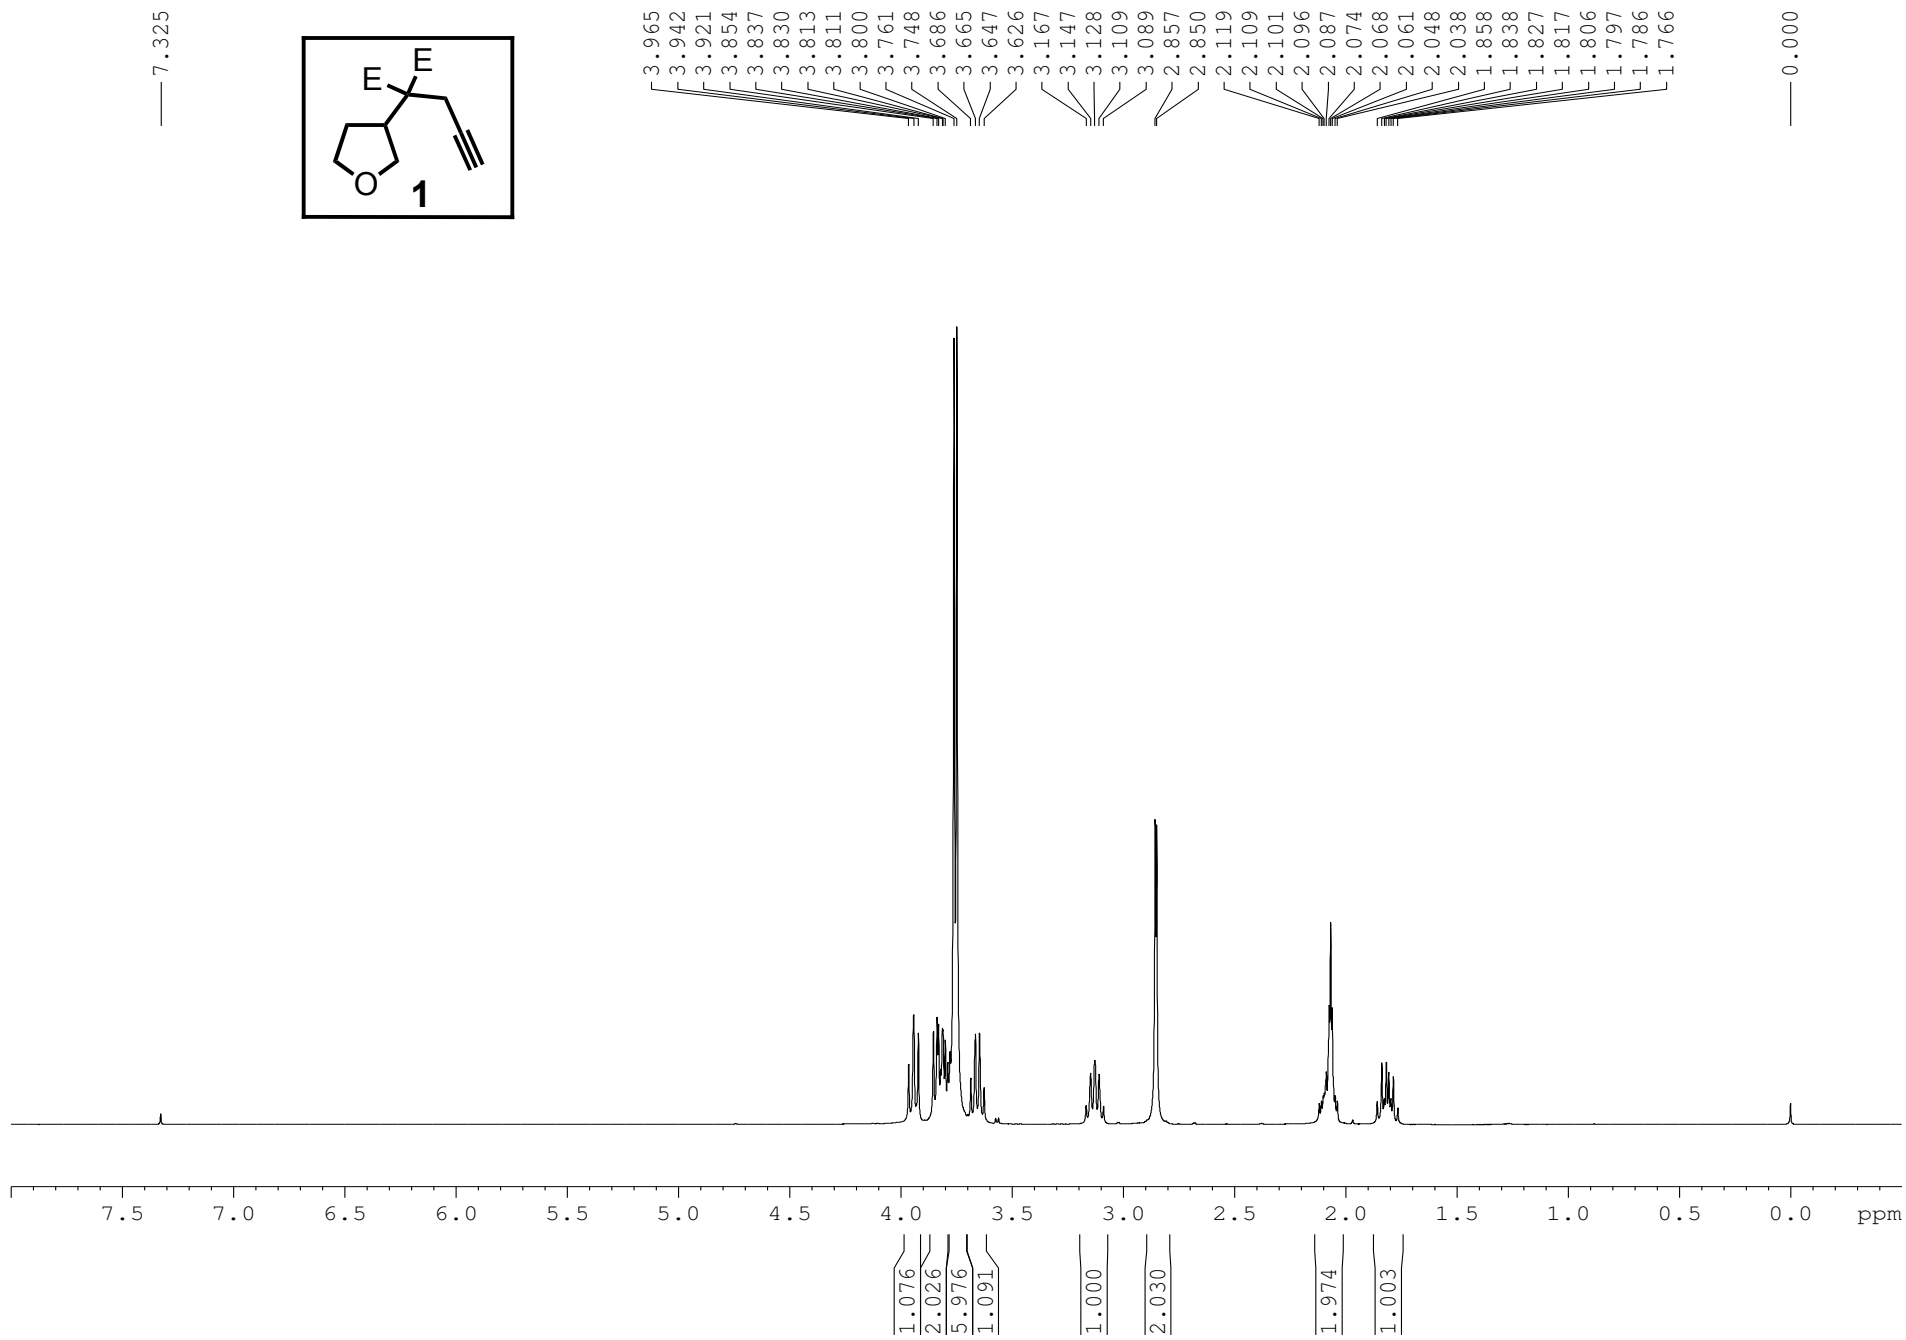

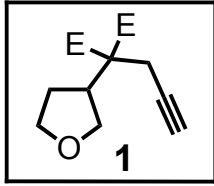

170.158  
169.839

78.663  
77.472  
77.154  
76.834  
71.763  
69.336  
67.817  
58.693  
52.784  
52.760  
41.806  
27.682  
24.337

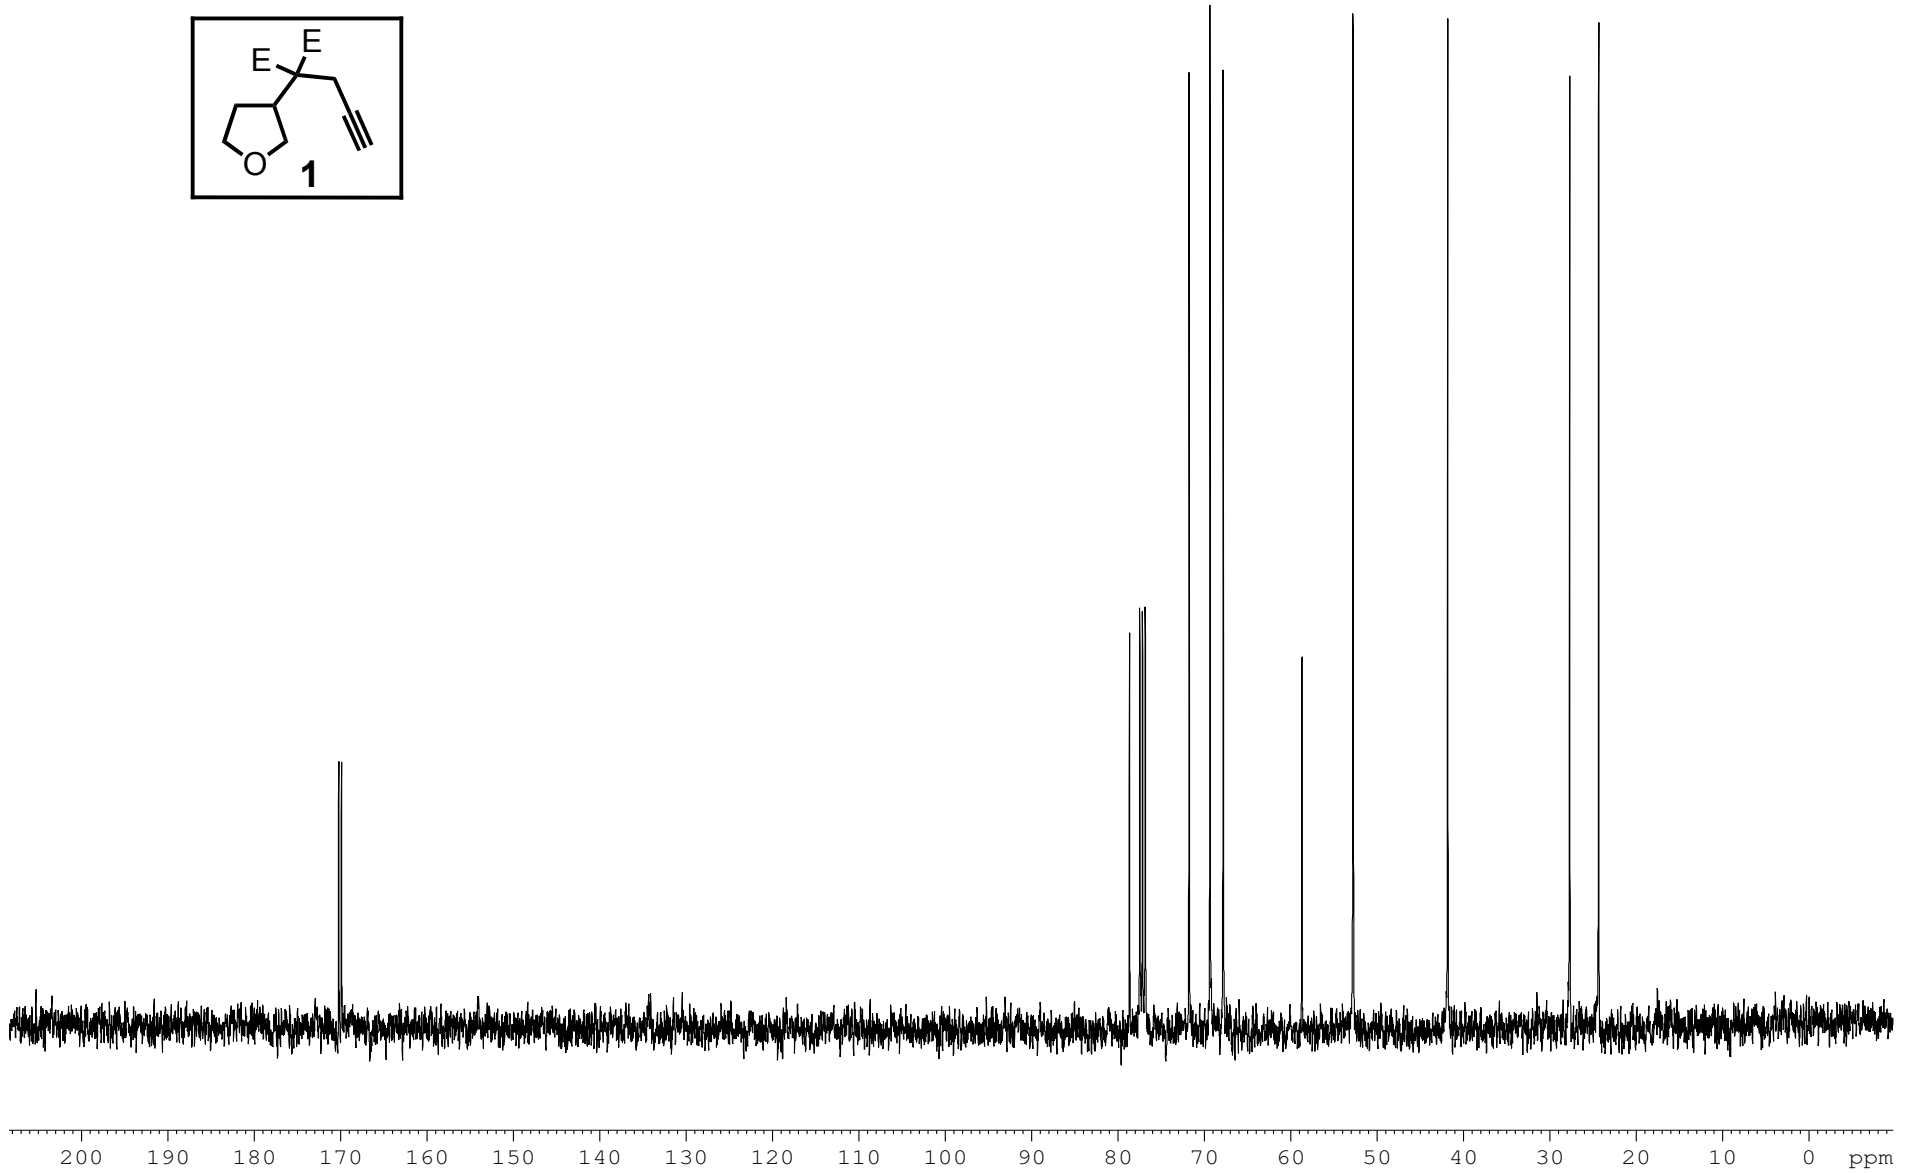

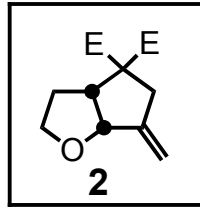

7.261

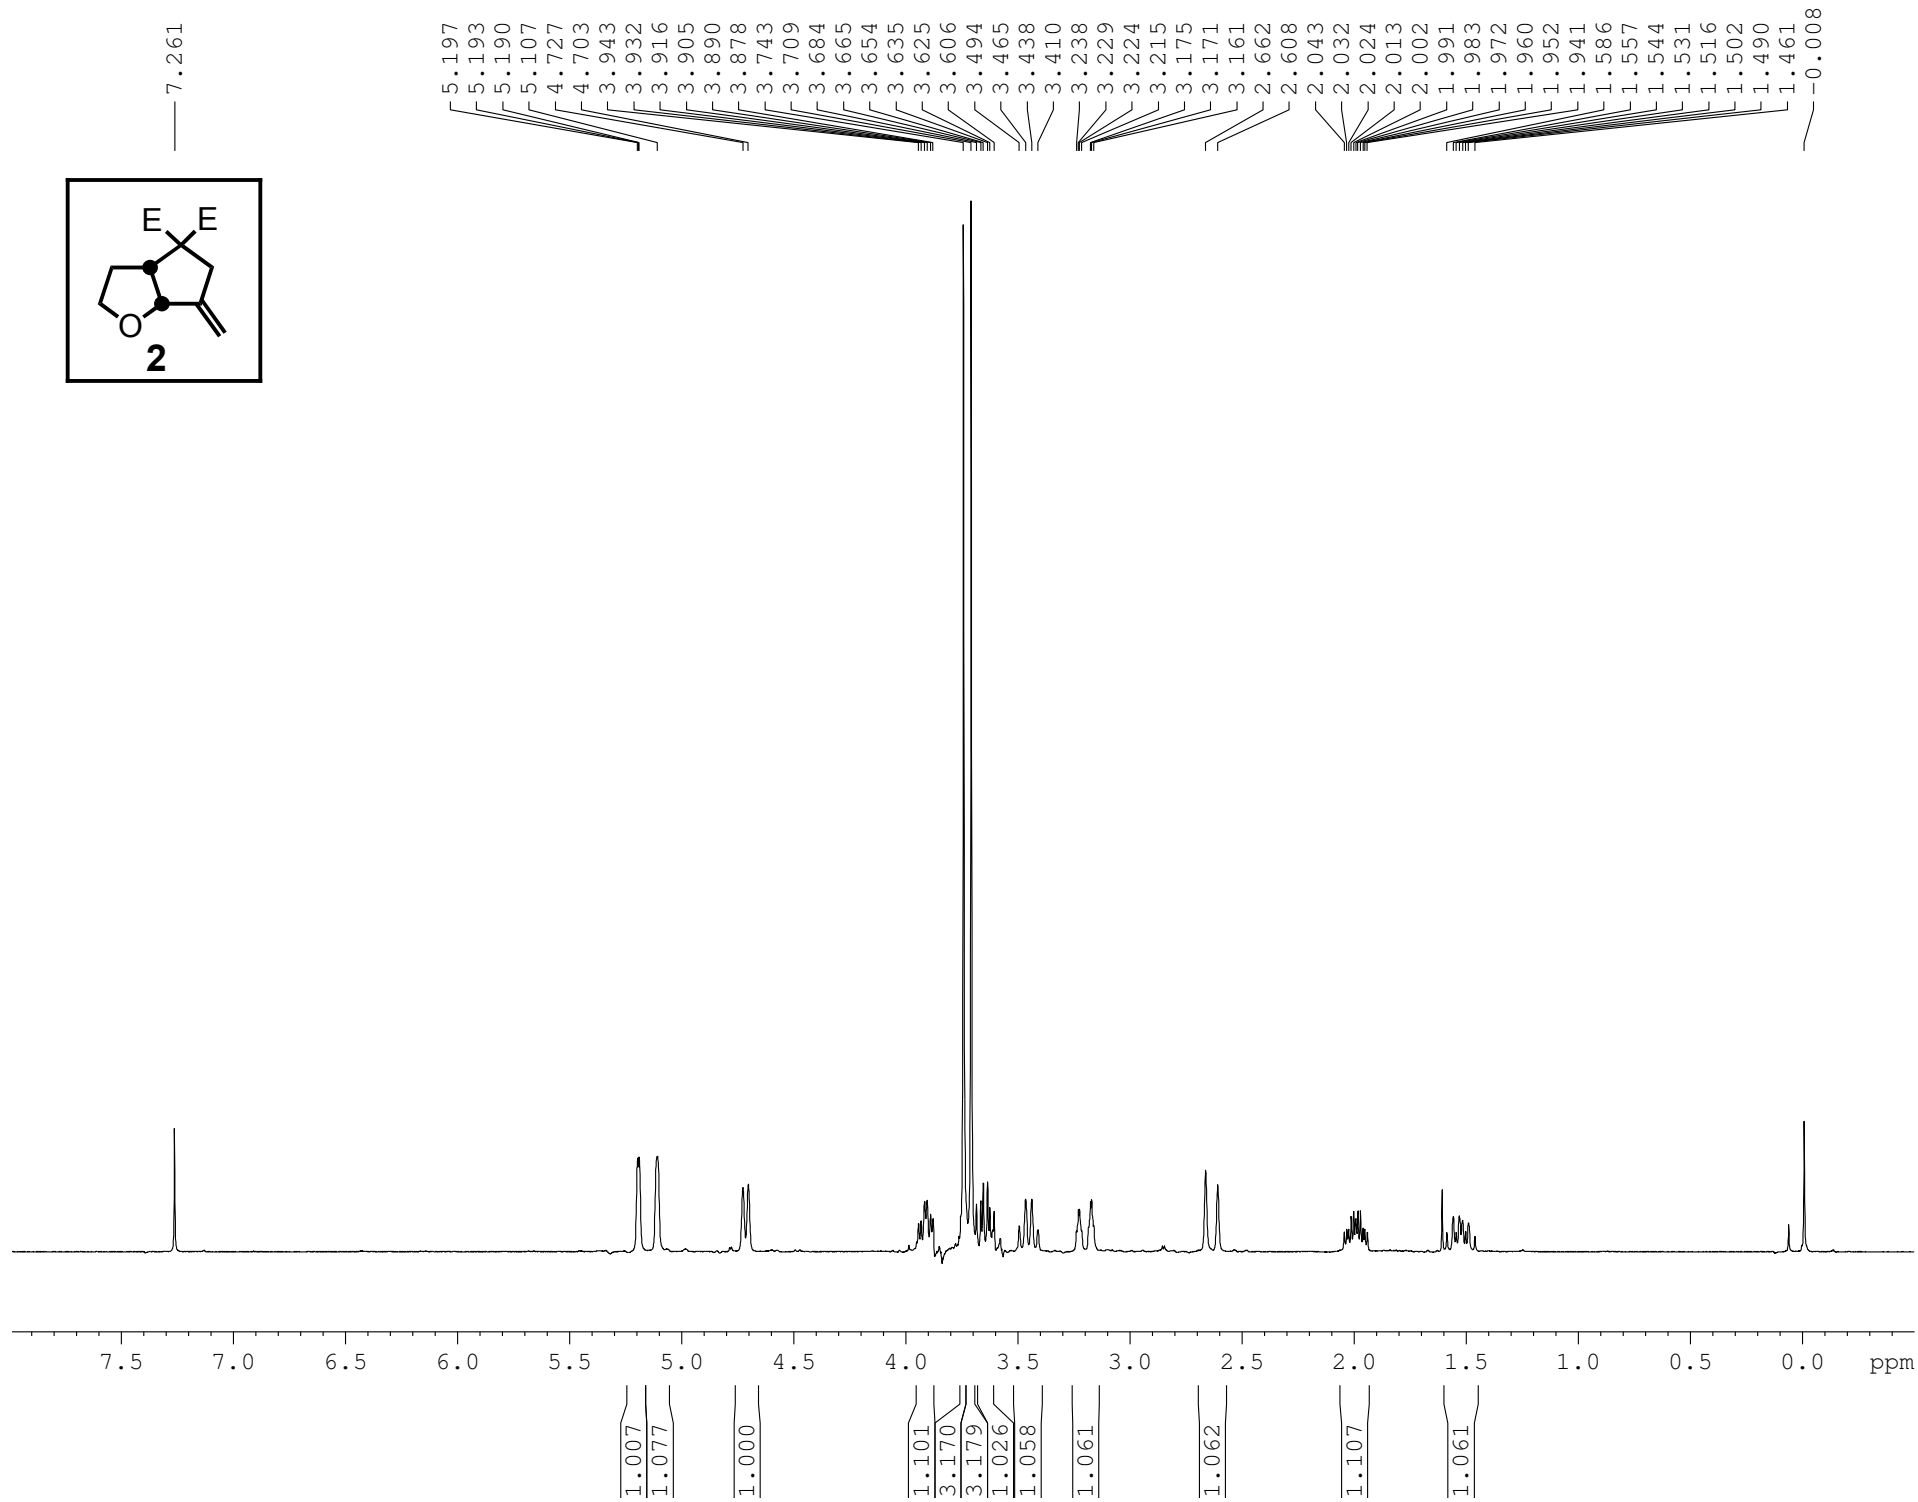

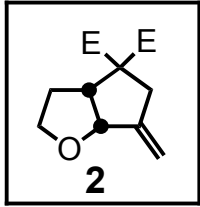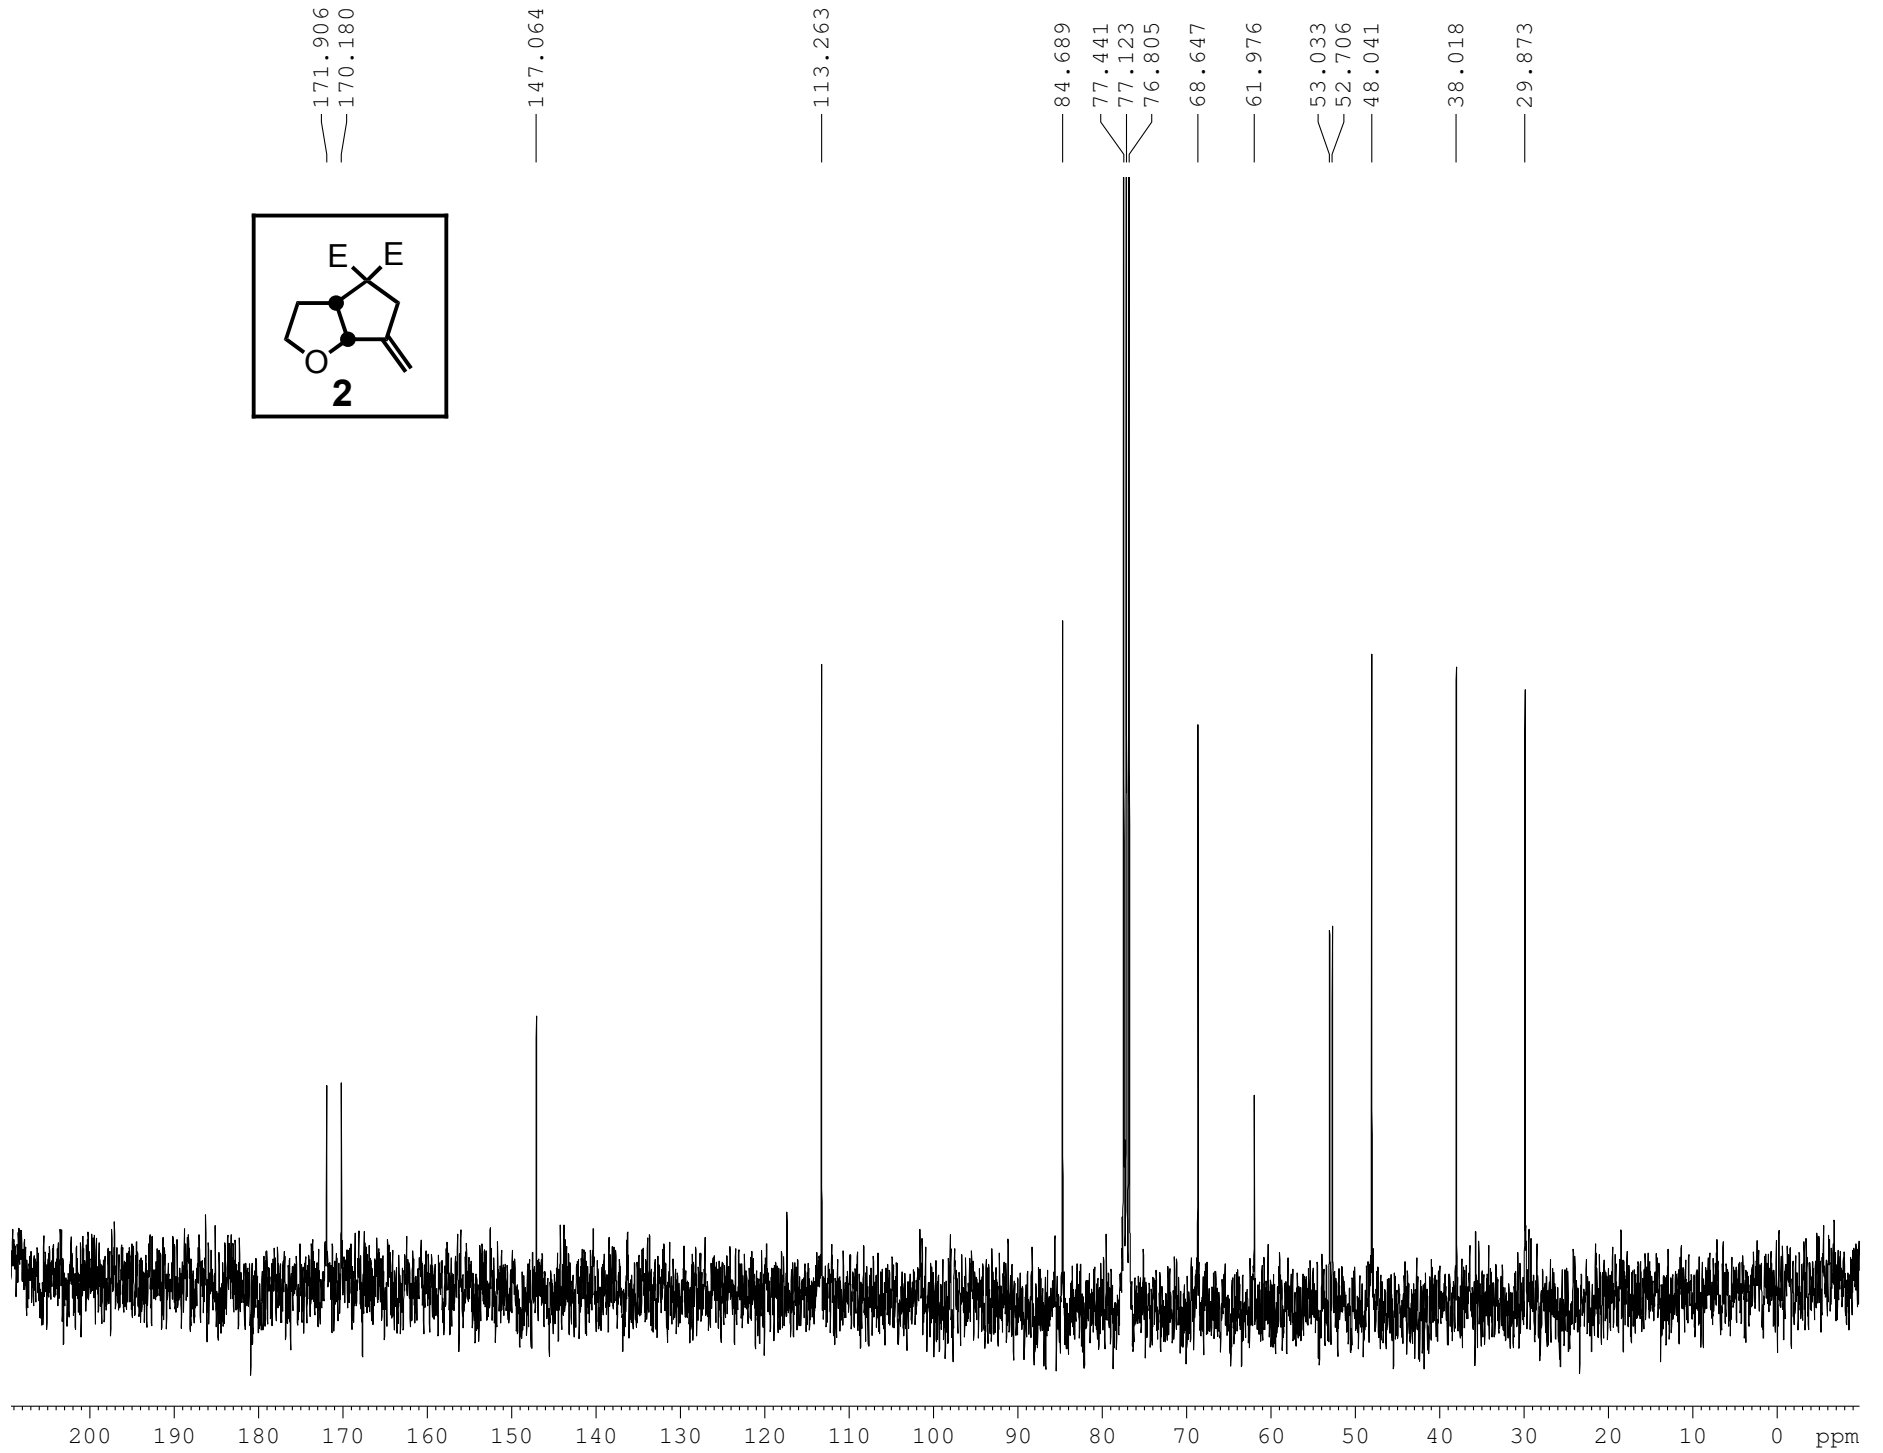

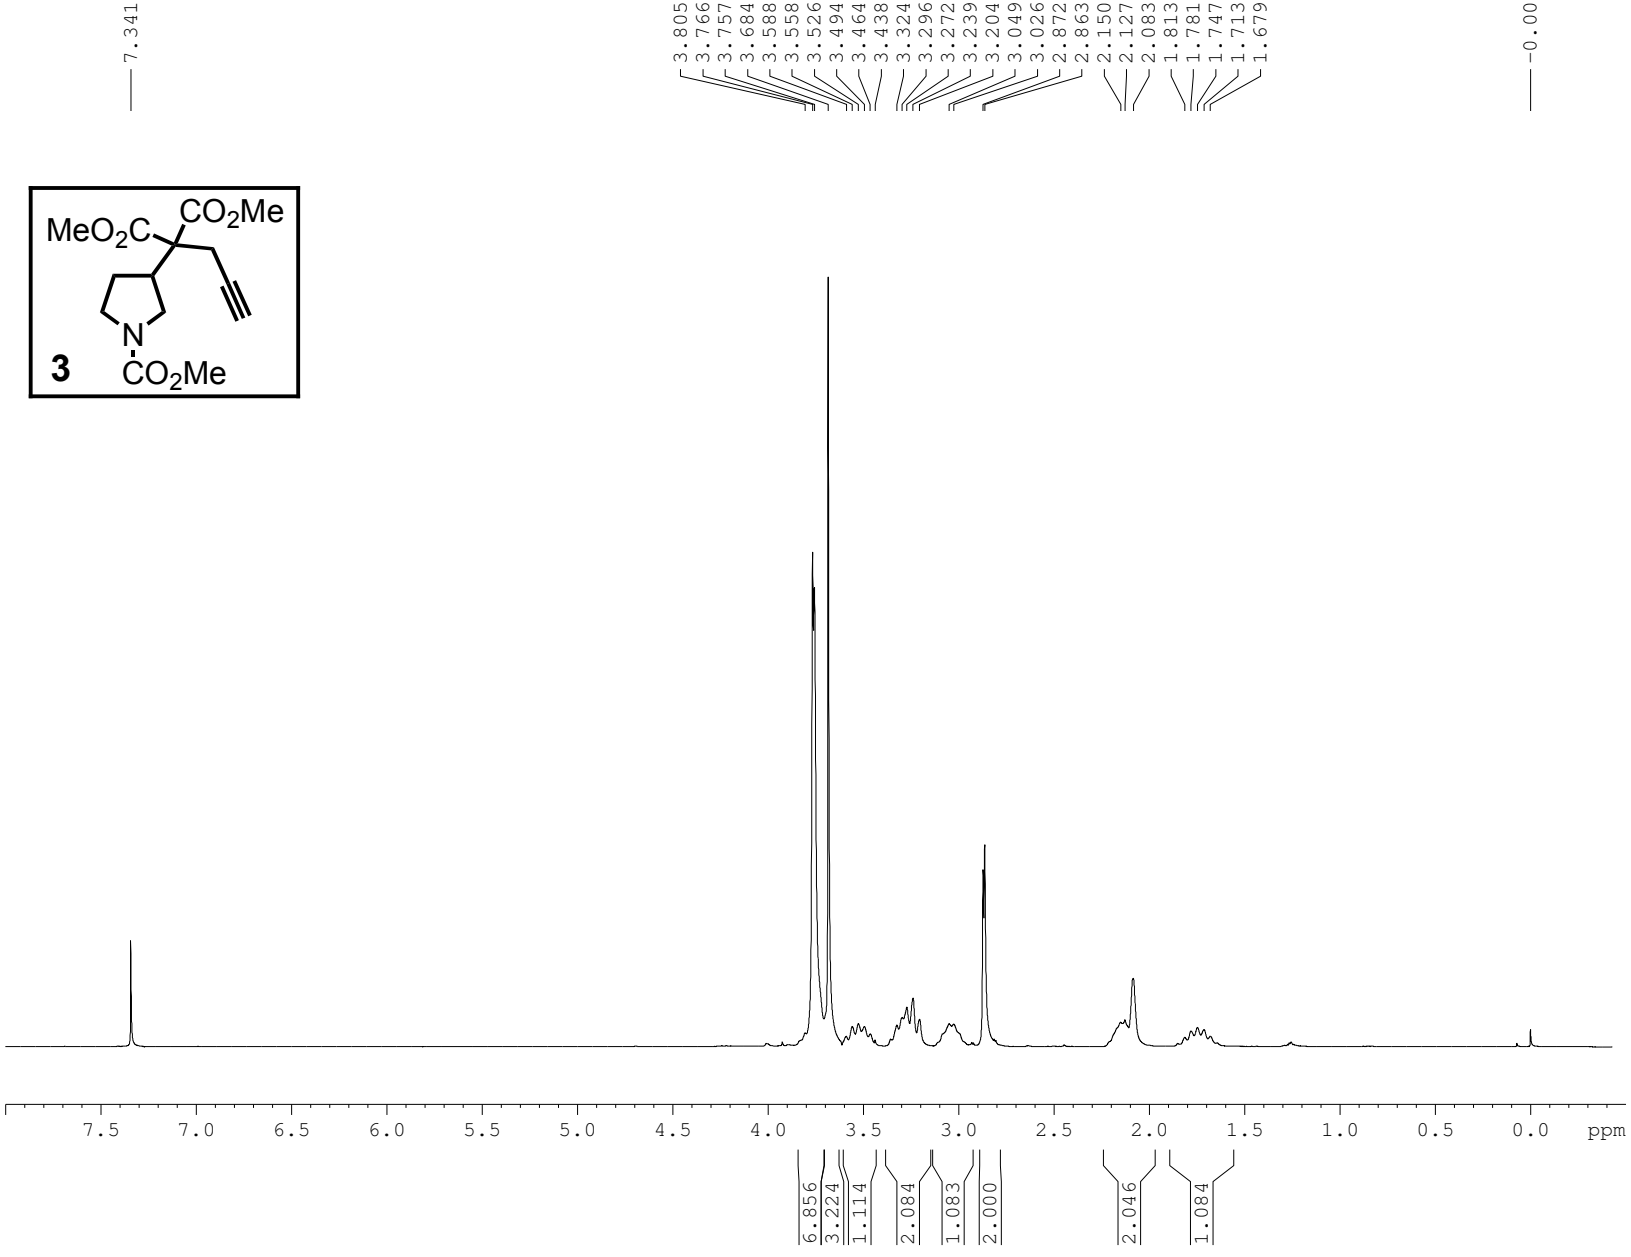

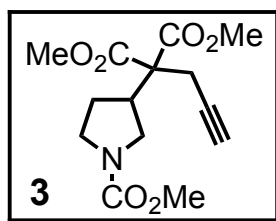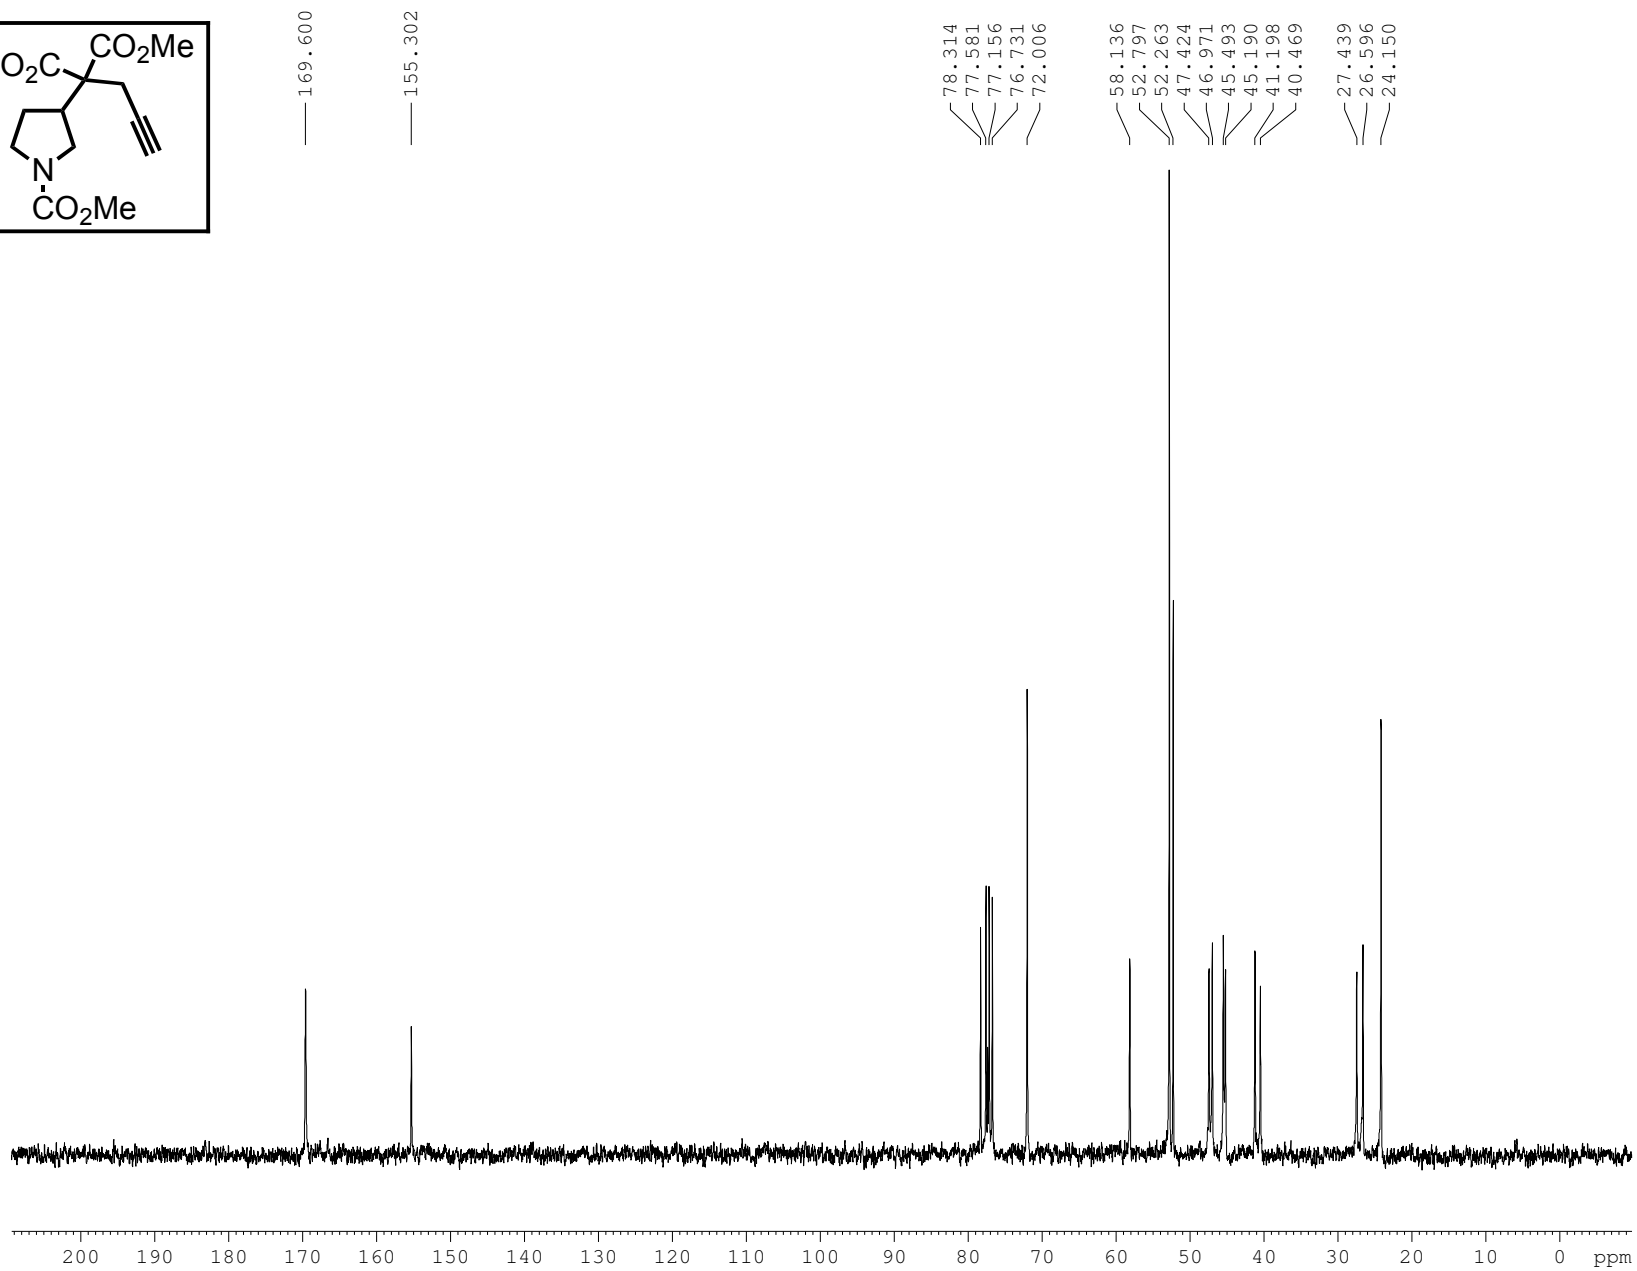

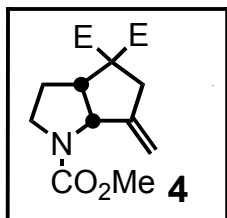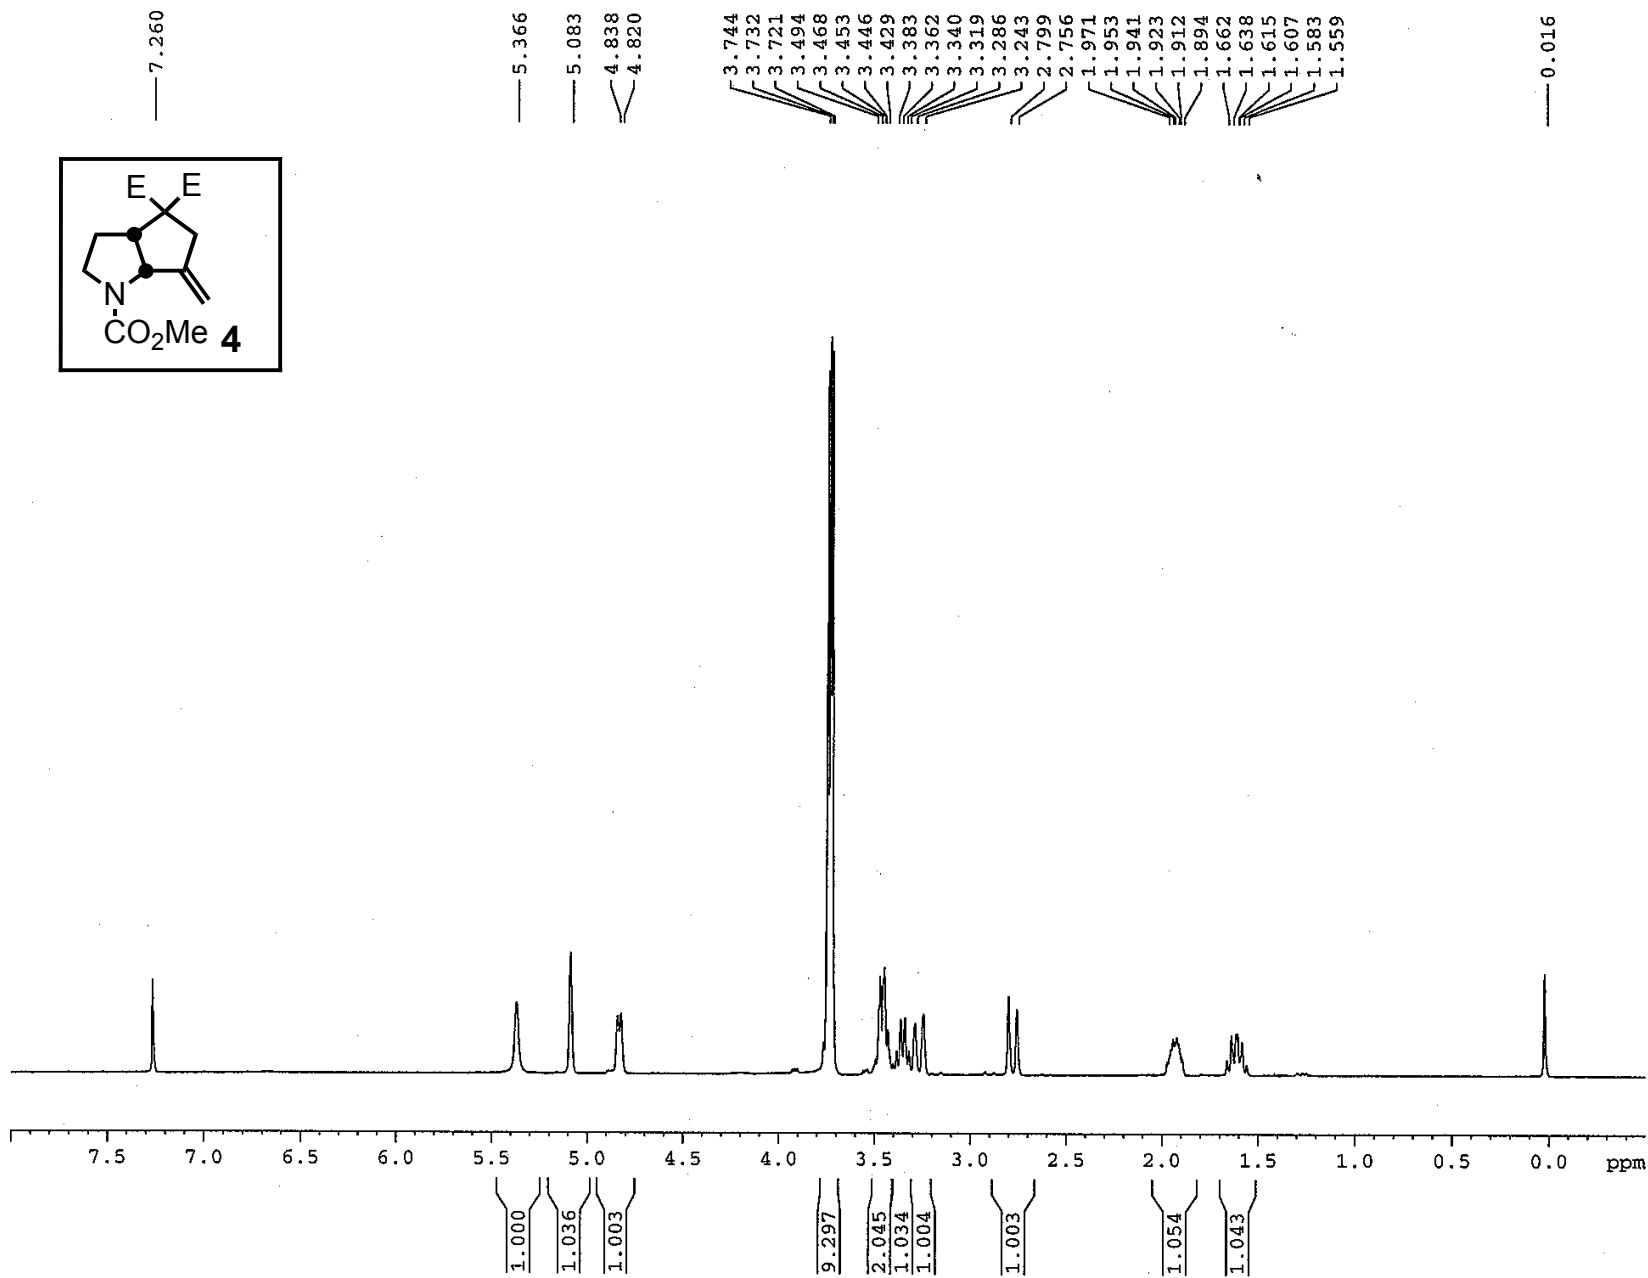



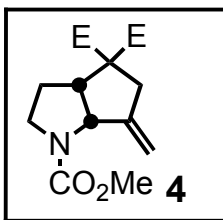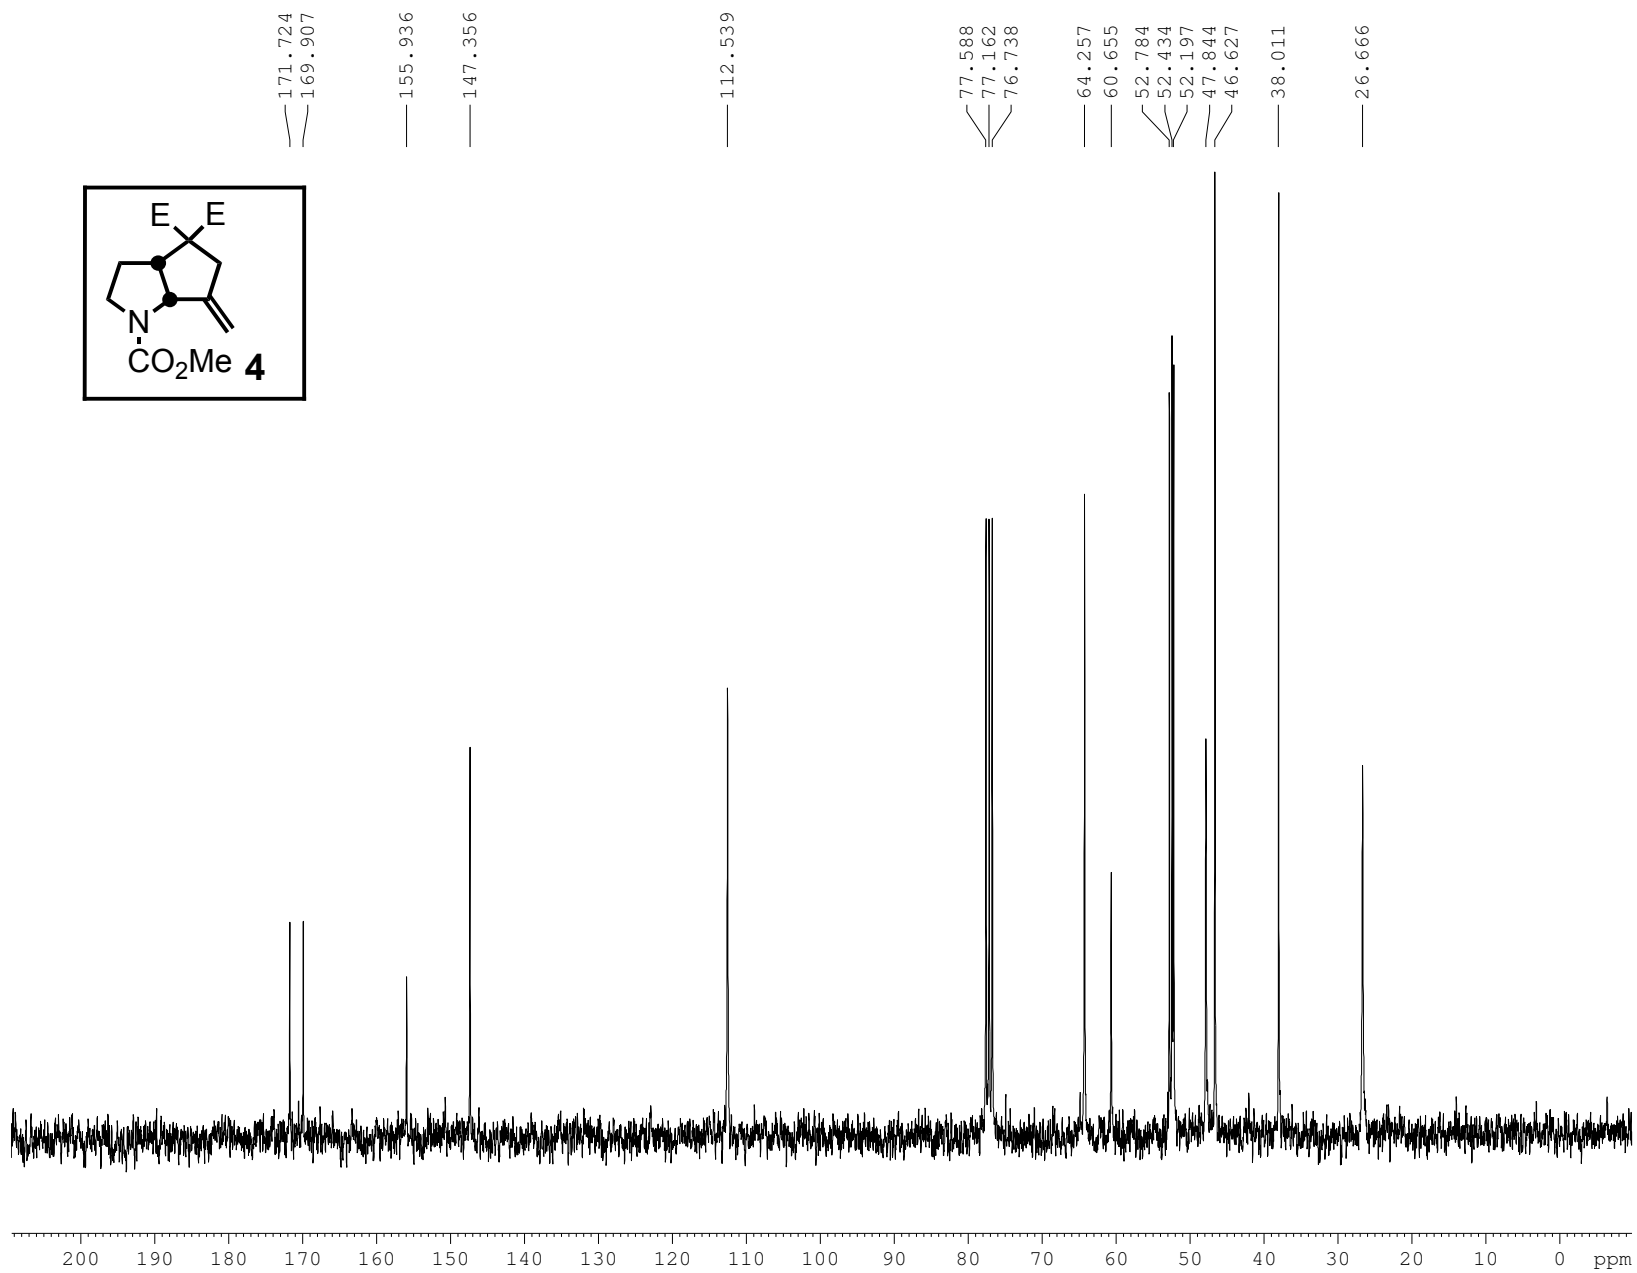

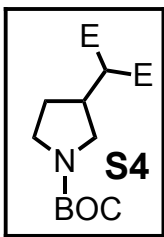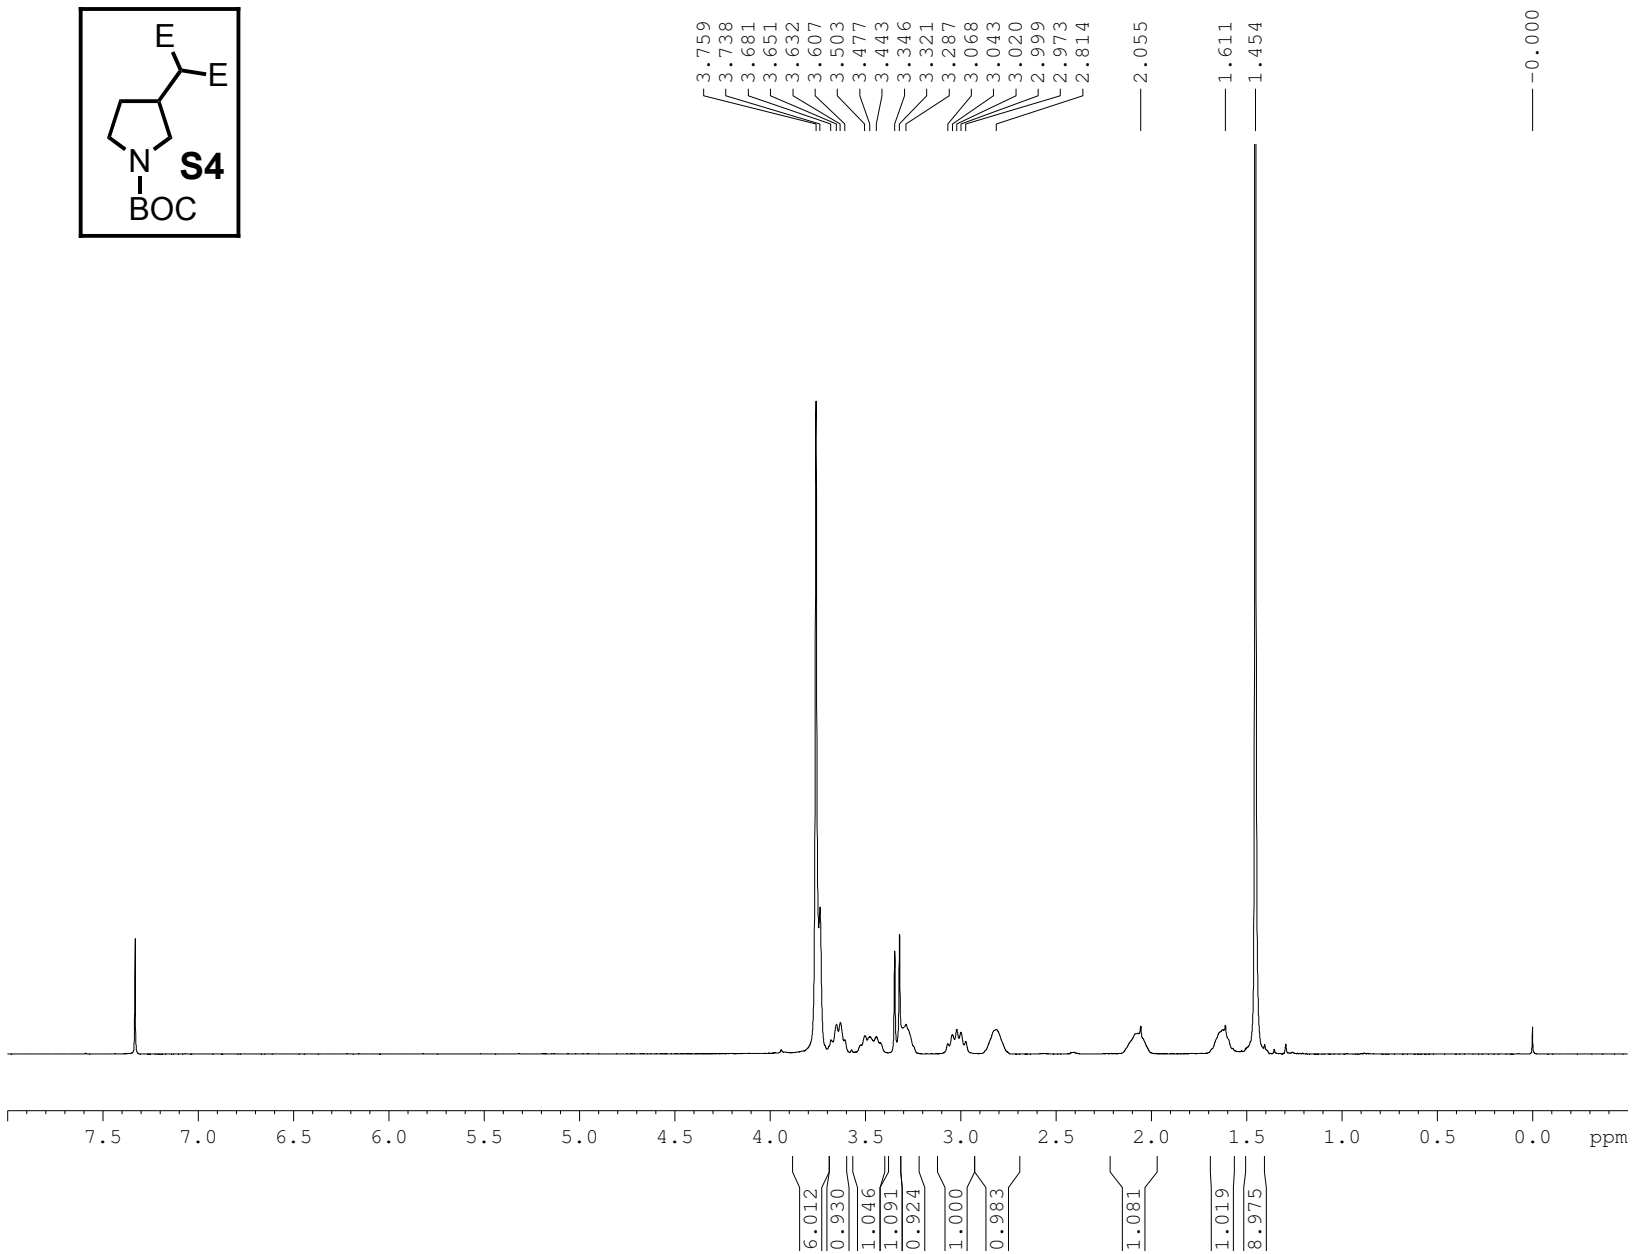

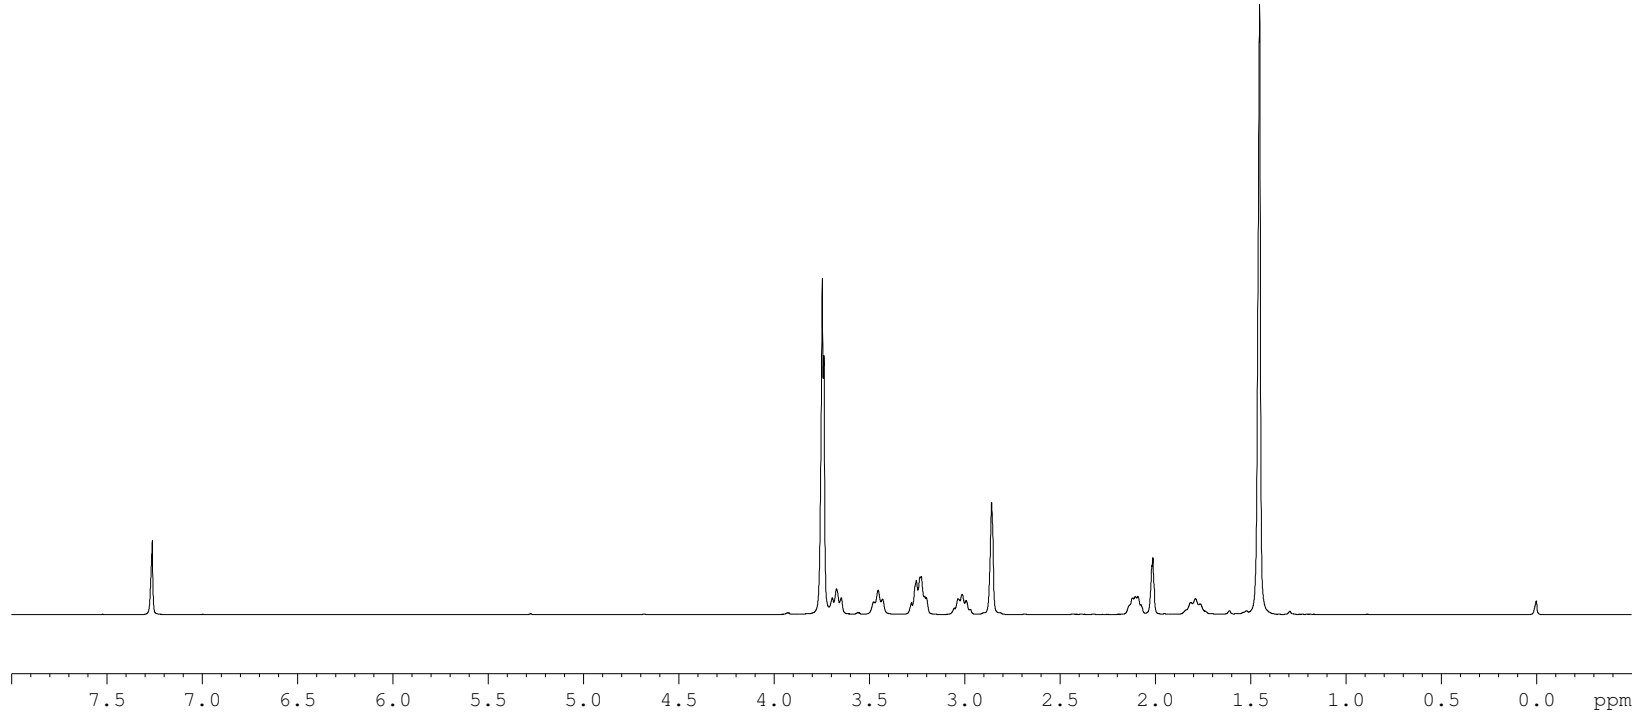

5.947  
1.098  
1.016  
2.003  
1.018  
2.000  
1.010  
0.975  
0.985  
8.985

3.747  
3.738  
3.695  
3.673  
3.648  
3.478  
3.454  
3.432  
3.279  
3.254  
3.235  
3.228  
3.202  
3.055  
3.035  
3.013  
2.993  
2.859  
2.117  
2.105  
2.092  
2.018  
2.013  
1.815  
1.790  
1.765  
1.453

7.260

0.002

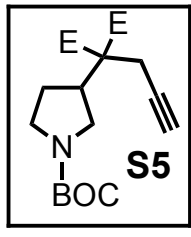

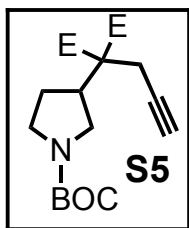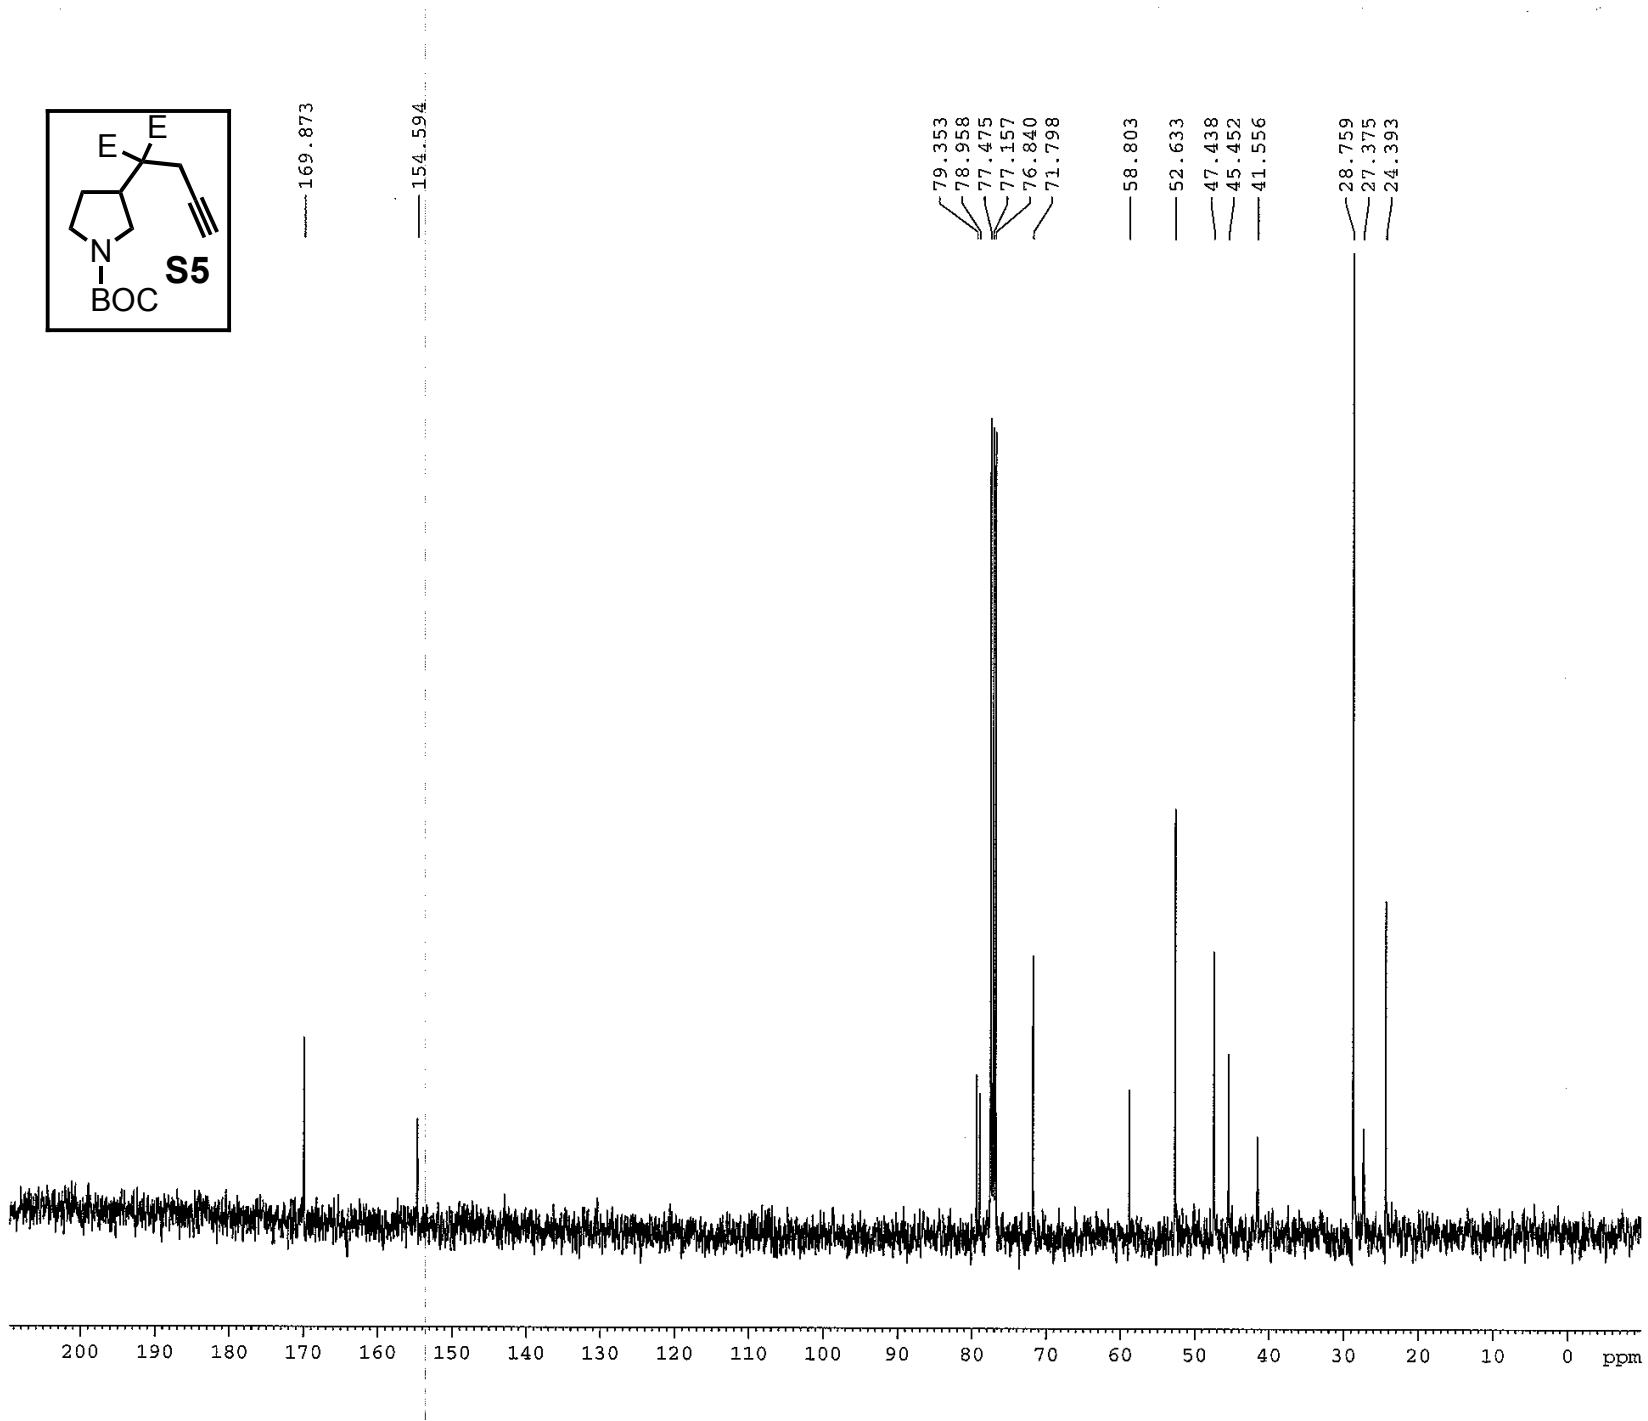

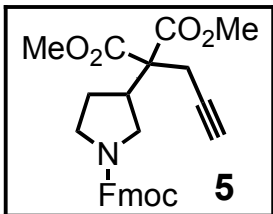

7.746  
7.609  
7.597  
7.405  
7.387  
7.368  
7.322  
7.303  
7.285  
7.253

4.389  
4.365  
4.346  
4.330  
4.303  
4.274  
4.256  
4.241  
4.225  
4.208  
3.864  
3.839  
3.817  
3.786  
3.760  
3.753  
3.737  
3.620  
3.596  
3.573  
3.550  
3.527  
3.410  
3.384  
3.358  
3.340  
3.313  
3.282  
3.256  
3.098  
3.077  
3.054  
2.885  
2.216  
2.201  
2.186  
2.171  
2.157  
2.141  
2.126  
2.092  
2.062  
2.027  
1.871  
1.843  
1.817  
1.790  
1.764  
1.737

— 0.002

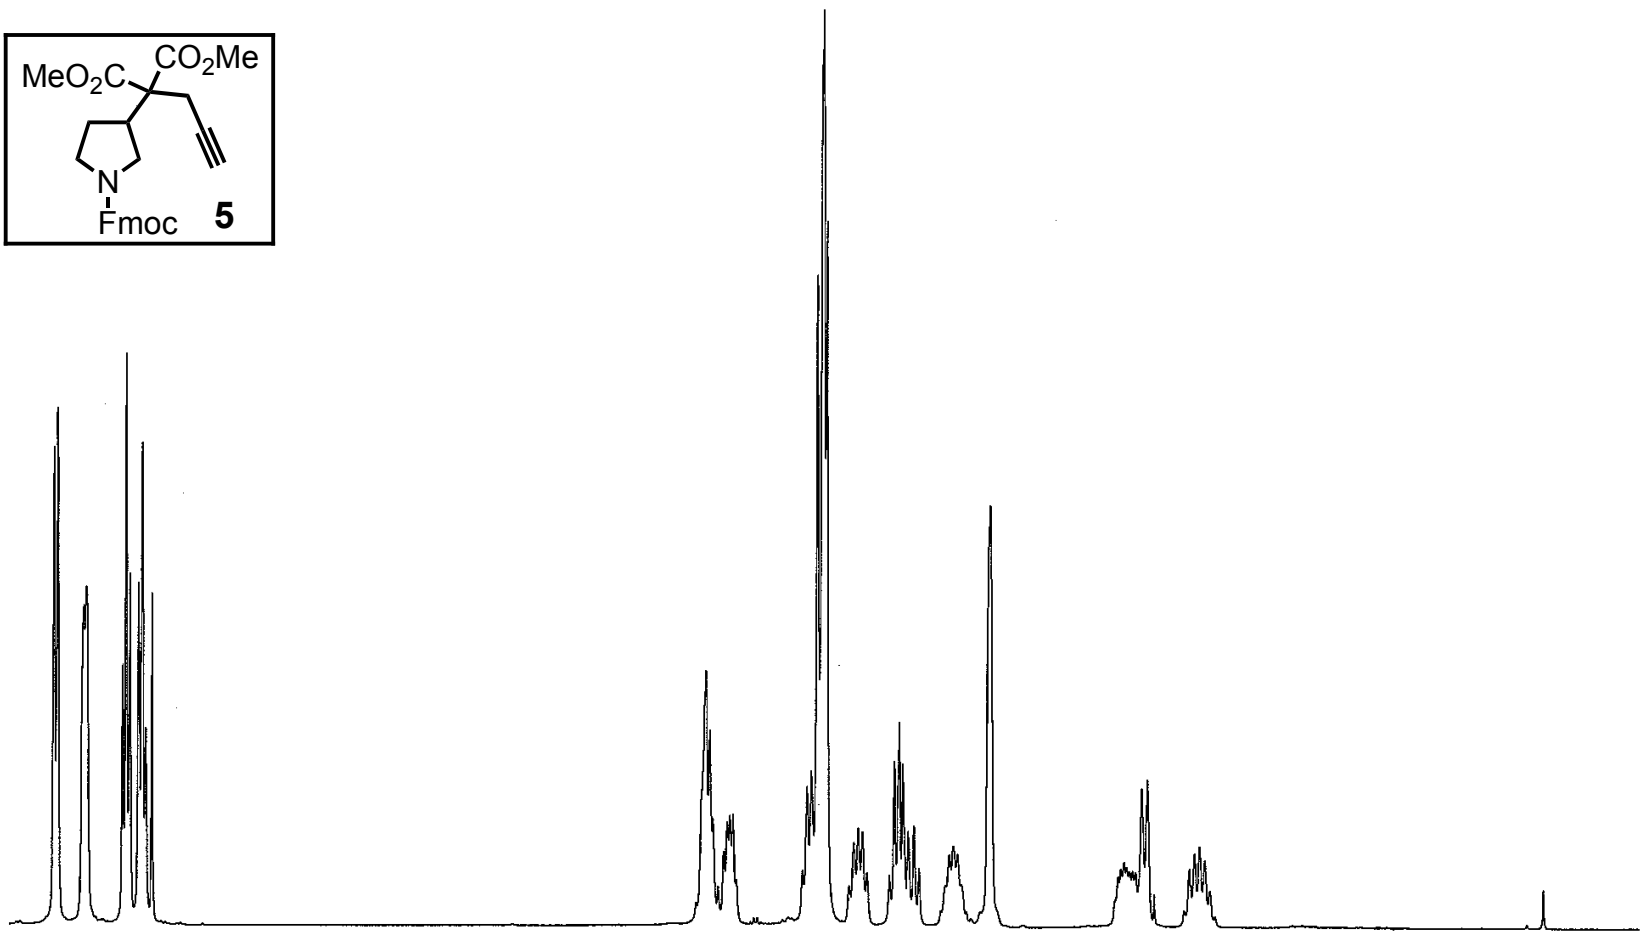

2.000  
2.047  
2.013  
2.017

1.999  
1.066

7.048  
1.052  
2.007  
1.032  
1.986

1.941  
1.006

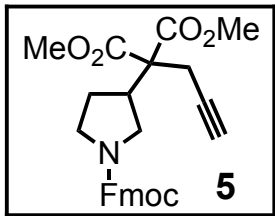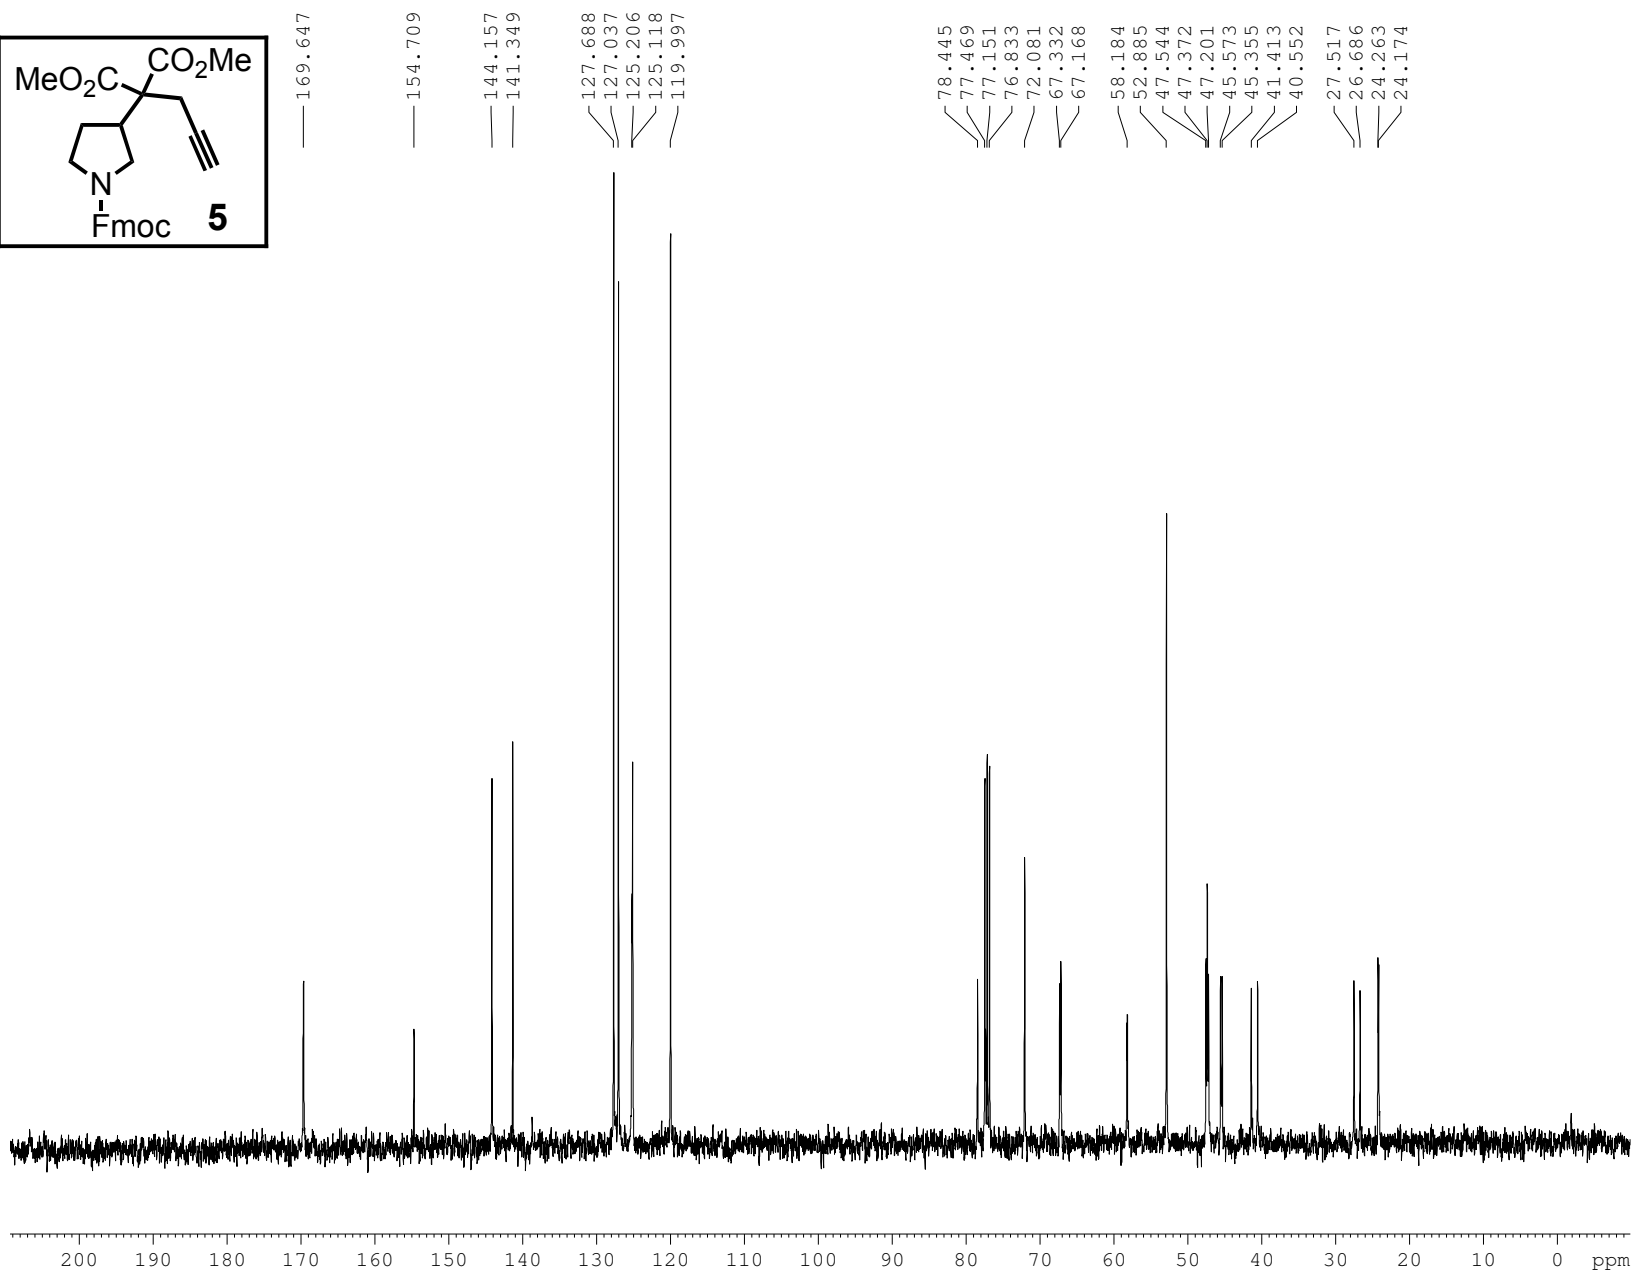

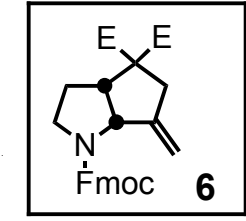

7.737  
7.600  
7.582  
7.398  
7.380  
7.361  
7.315  
7.296  
7.278  
7.250

5.487  
5.104  
4.994  
4.894  
4.879  
4.737  
4.477  
4.429  
4.410  
4.381  
4.254  
4.237  
4.220  
3.739  
3.550  
3.522  
3.497  
3.467  
3.404  
3.385  
3.356  
3.331  
3.311  
3.267  
2.780  
2.737

1.906  
1.654  
1.627  
1.600  
1.569  
1.540  
1.256

0.001

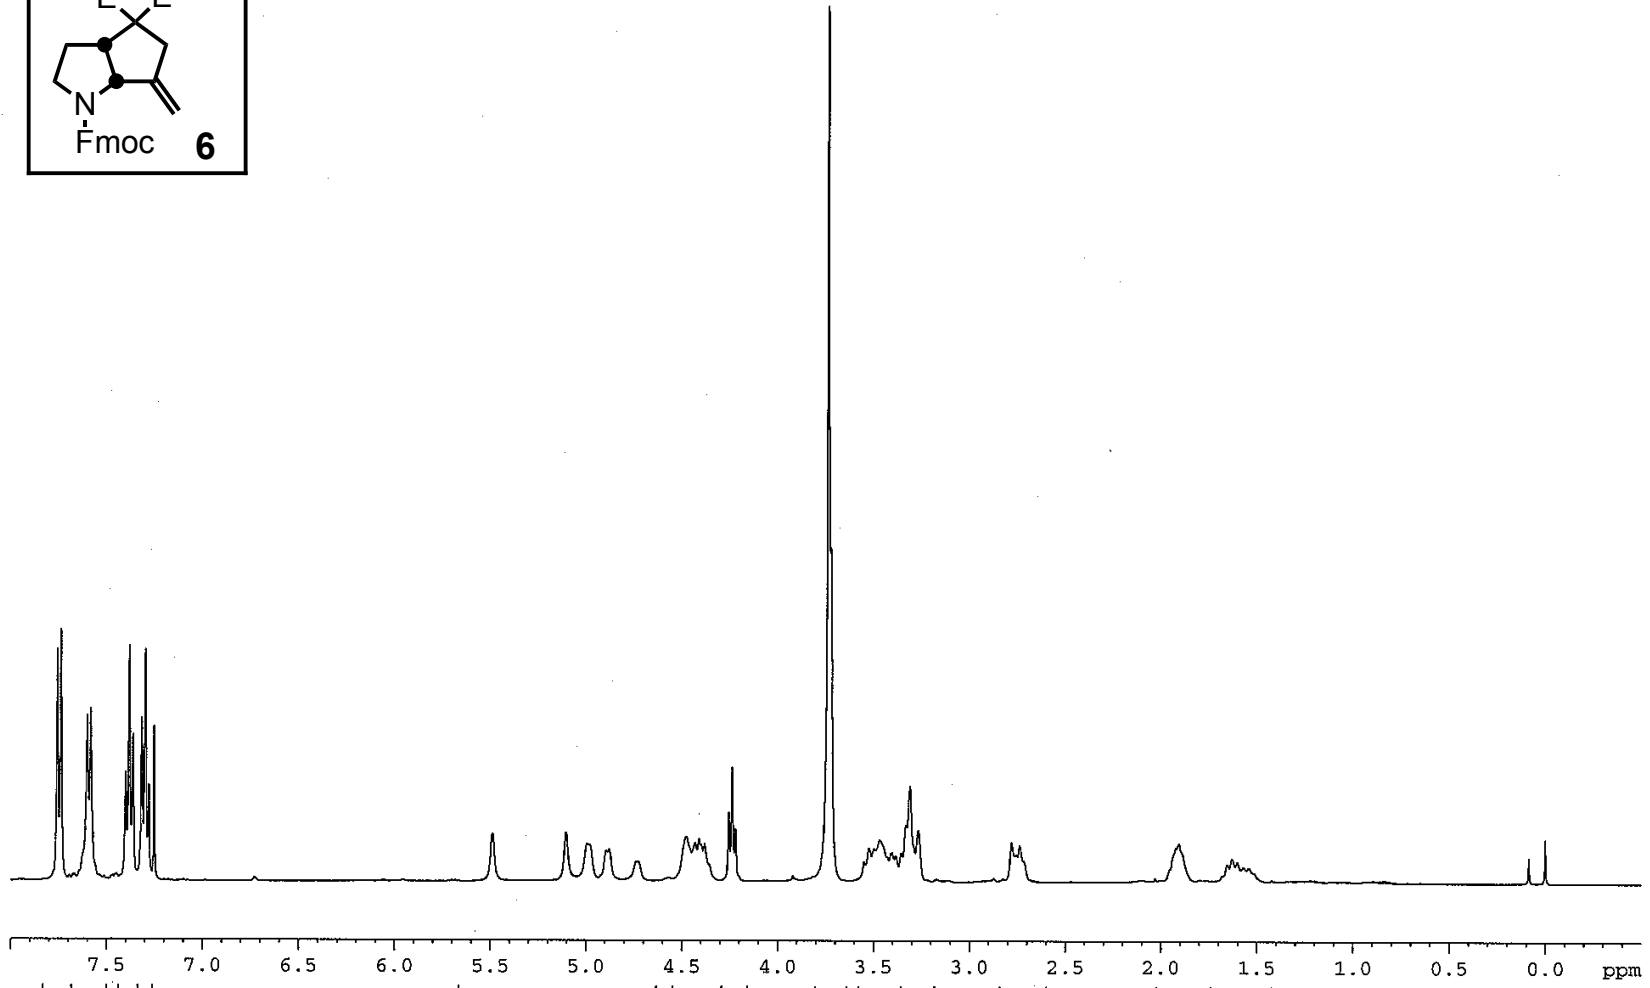

2.000  
2.107  
2.030  
1.957

2.964

1.983  
0.995

5.969  
2.007  
1.862

0.946

1.042  
0.993

ppm

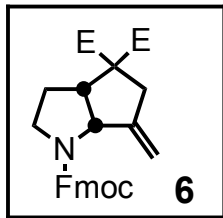

171.717  
169.948

155.377

147.071  
144.389  
141.623

127.737  
127.130  
125.124  
120.026

112.762

77.476  
77.158  
76.840

67.267  
64.359  
60.632

52.836  
52.487  
47.796  
46.654

37.987

26.746

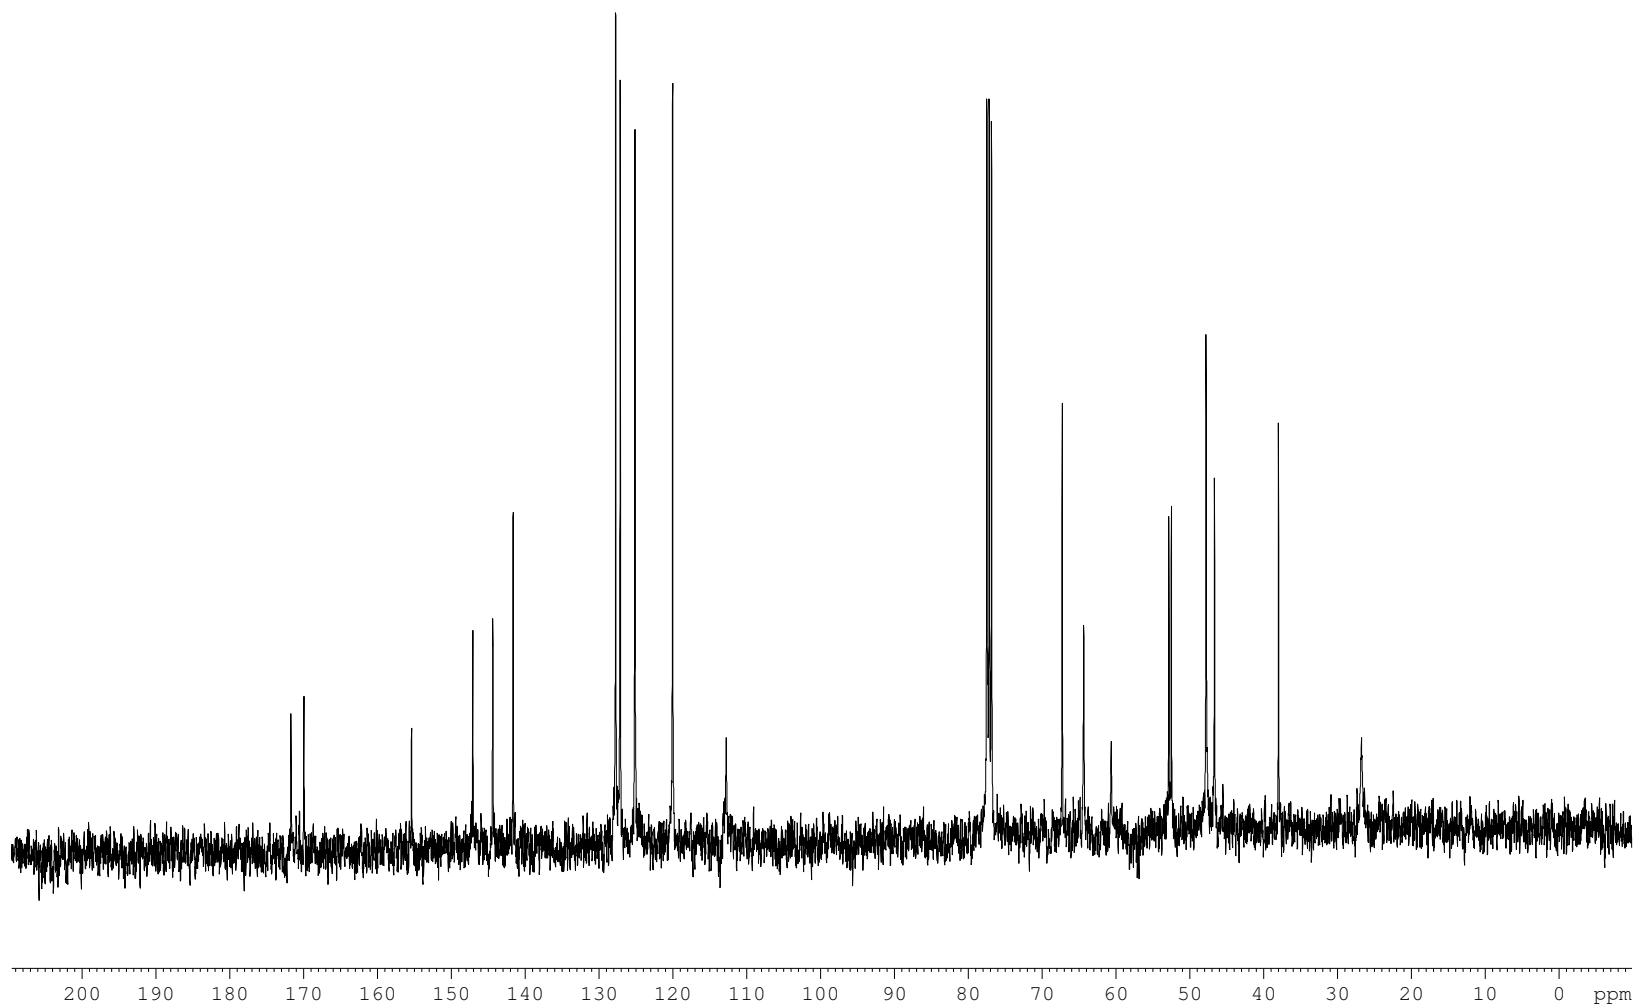



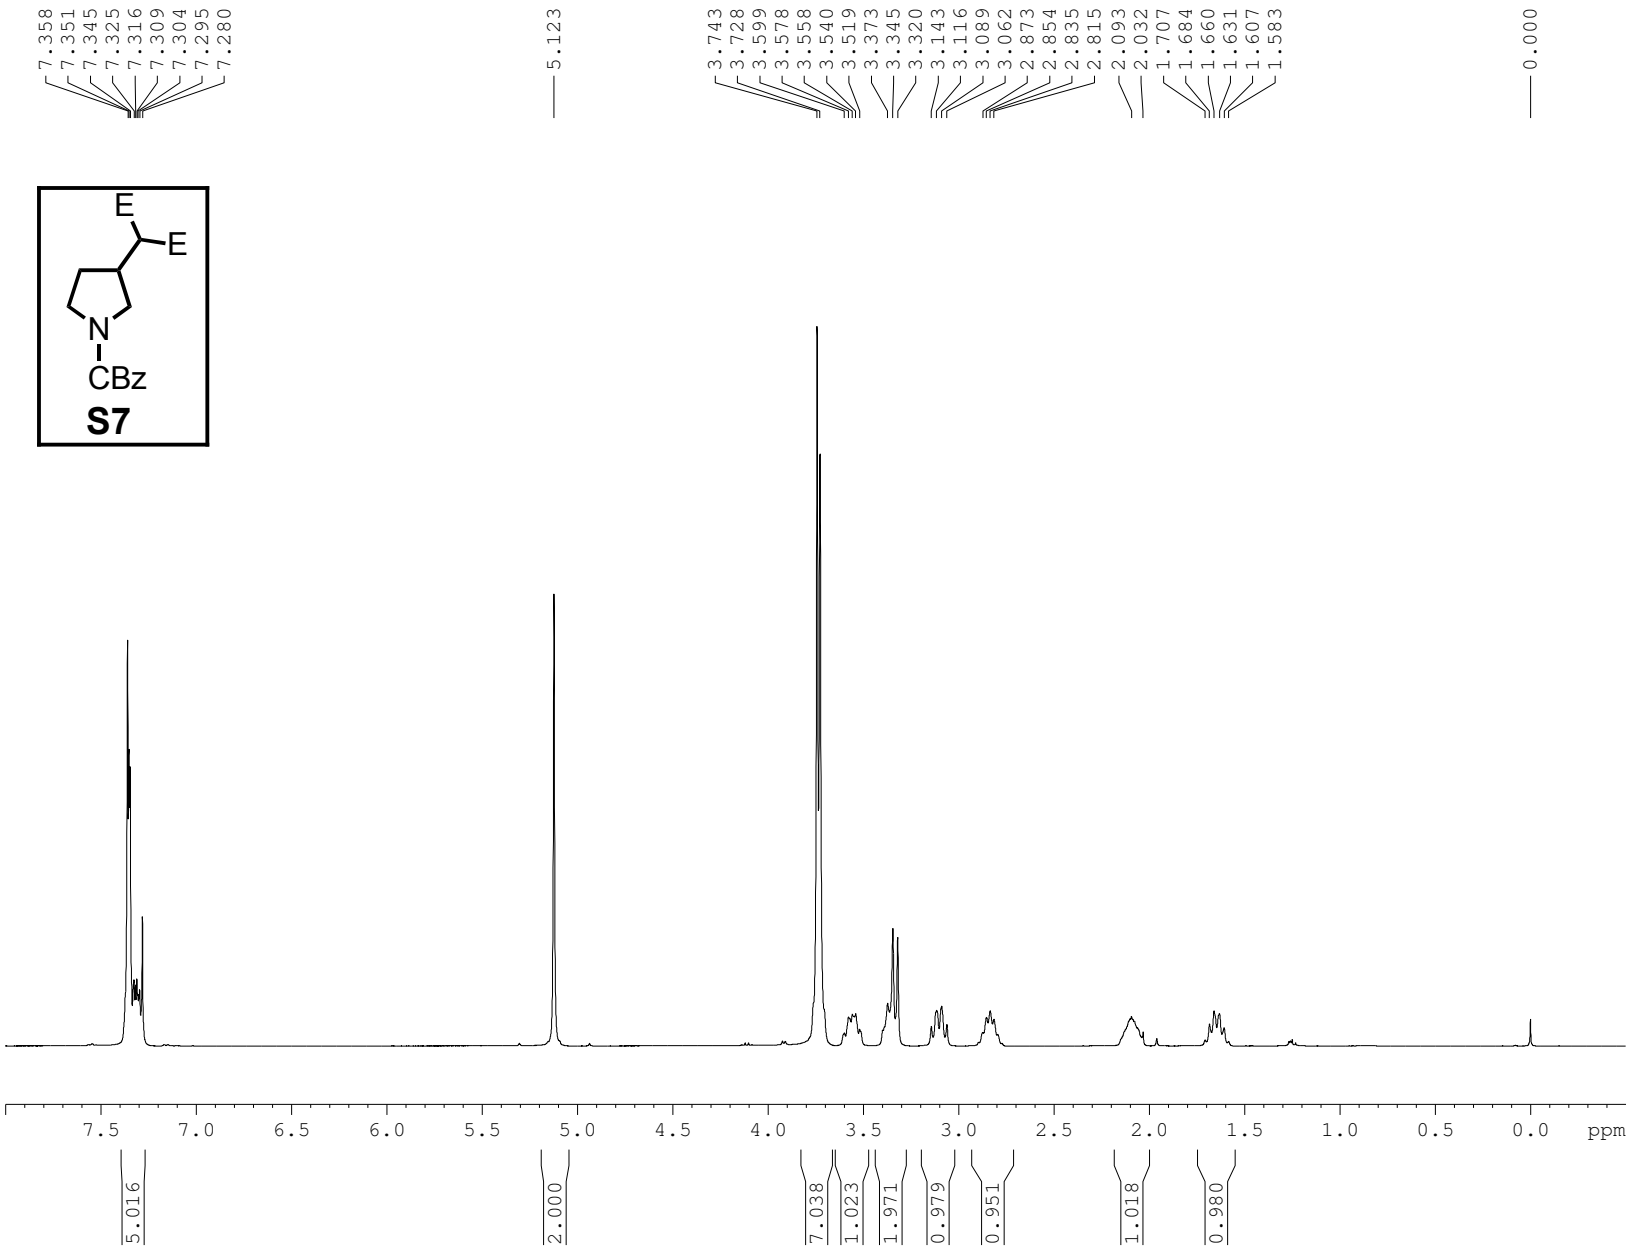

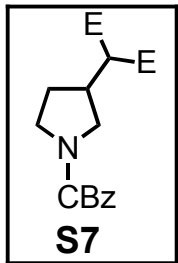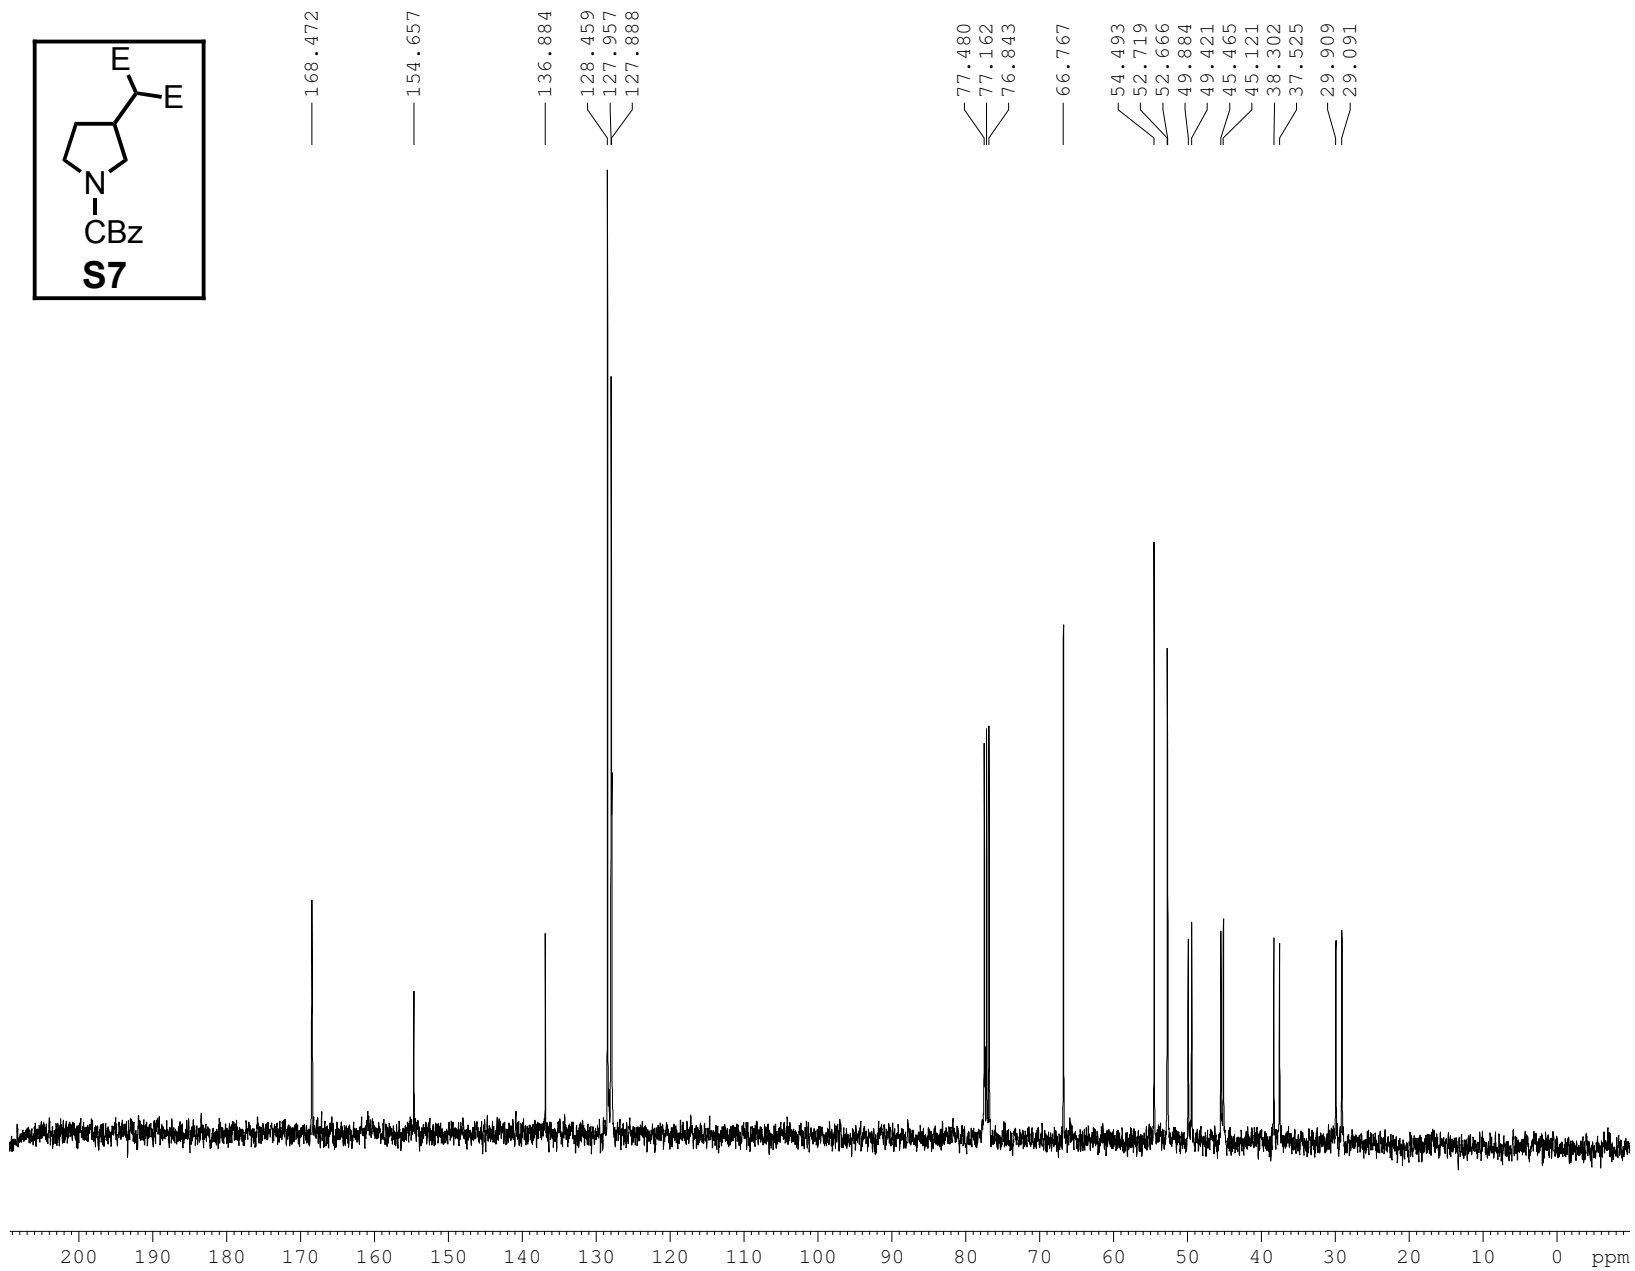

7.348  
7.327  
7.308  
7.288  
7.270  
7.266  
7.259  
7.254  
7.241  
7.236

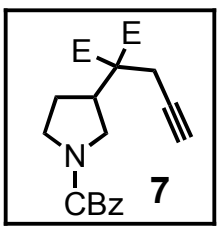

5.115  
3.785  
3.765  
3.758  
3.738  
3.722  
3.717  
3.699  
3.695  
3.560  
3.538  
3.534  
3.511  
3.360  
3.350  
3.333  
3.328  
3.308  
3.281  
3.080  
3.057  
3.036  
3.014  
2.993  
2.854  
2.848  
2.150  
2.133  
2.119  
2.102  
2.084  
2.021  
2.015  
2.010  
1.856  
1.831  
1.804  
1.777  
1.752

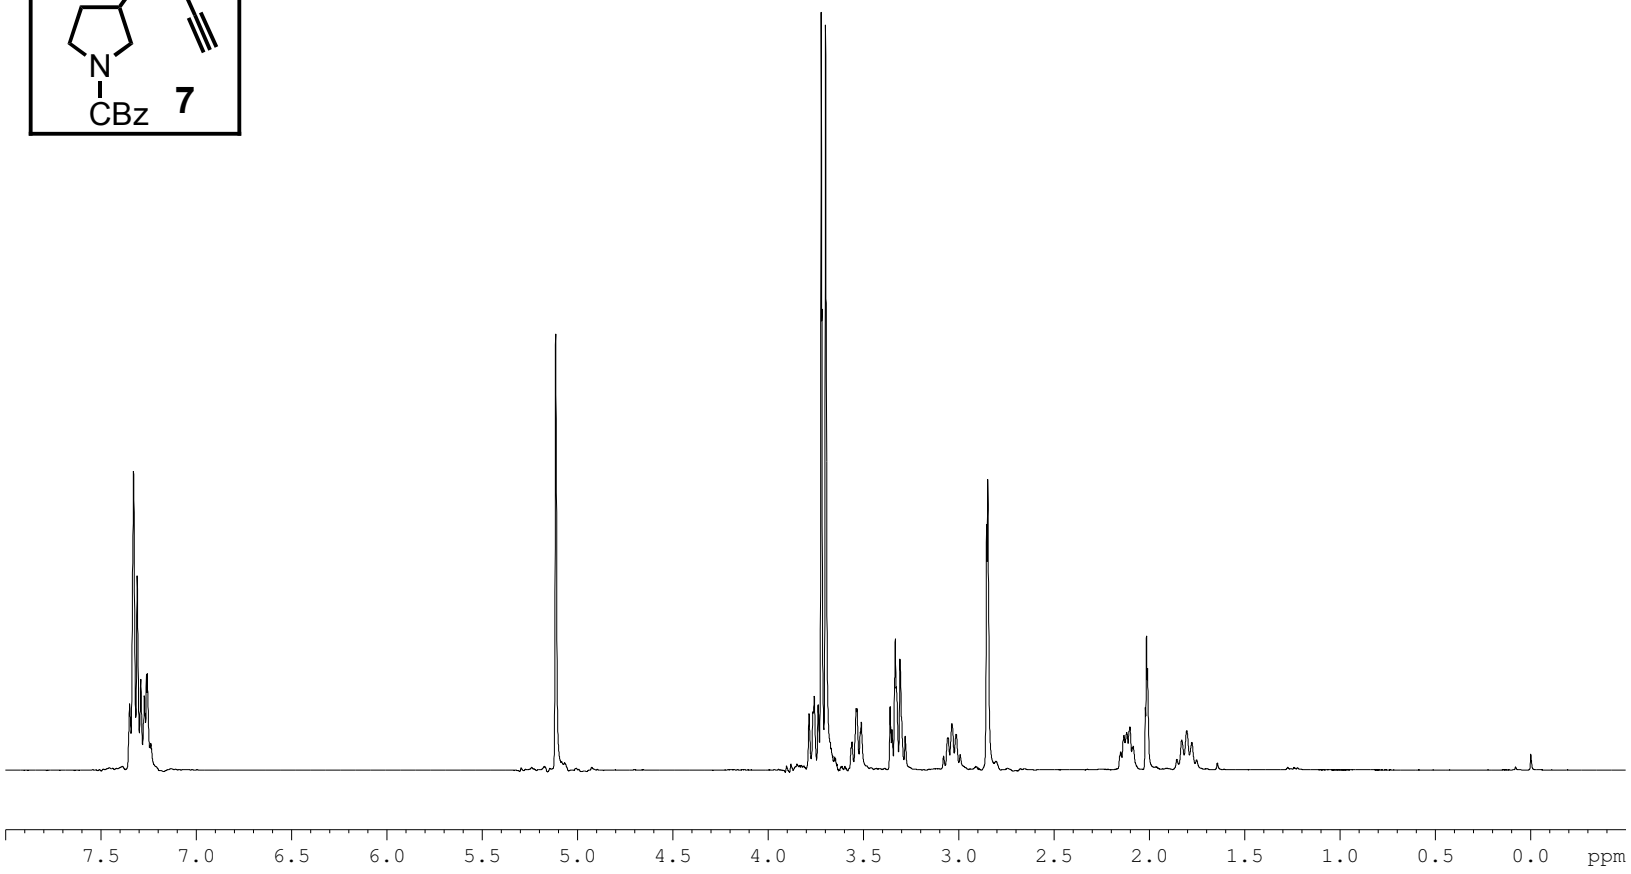

5.010

2.000

7.069

1.036

2.056

1.032

2.042

1.046

0.898

1.007

— 0.001

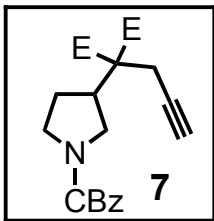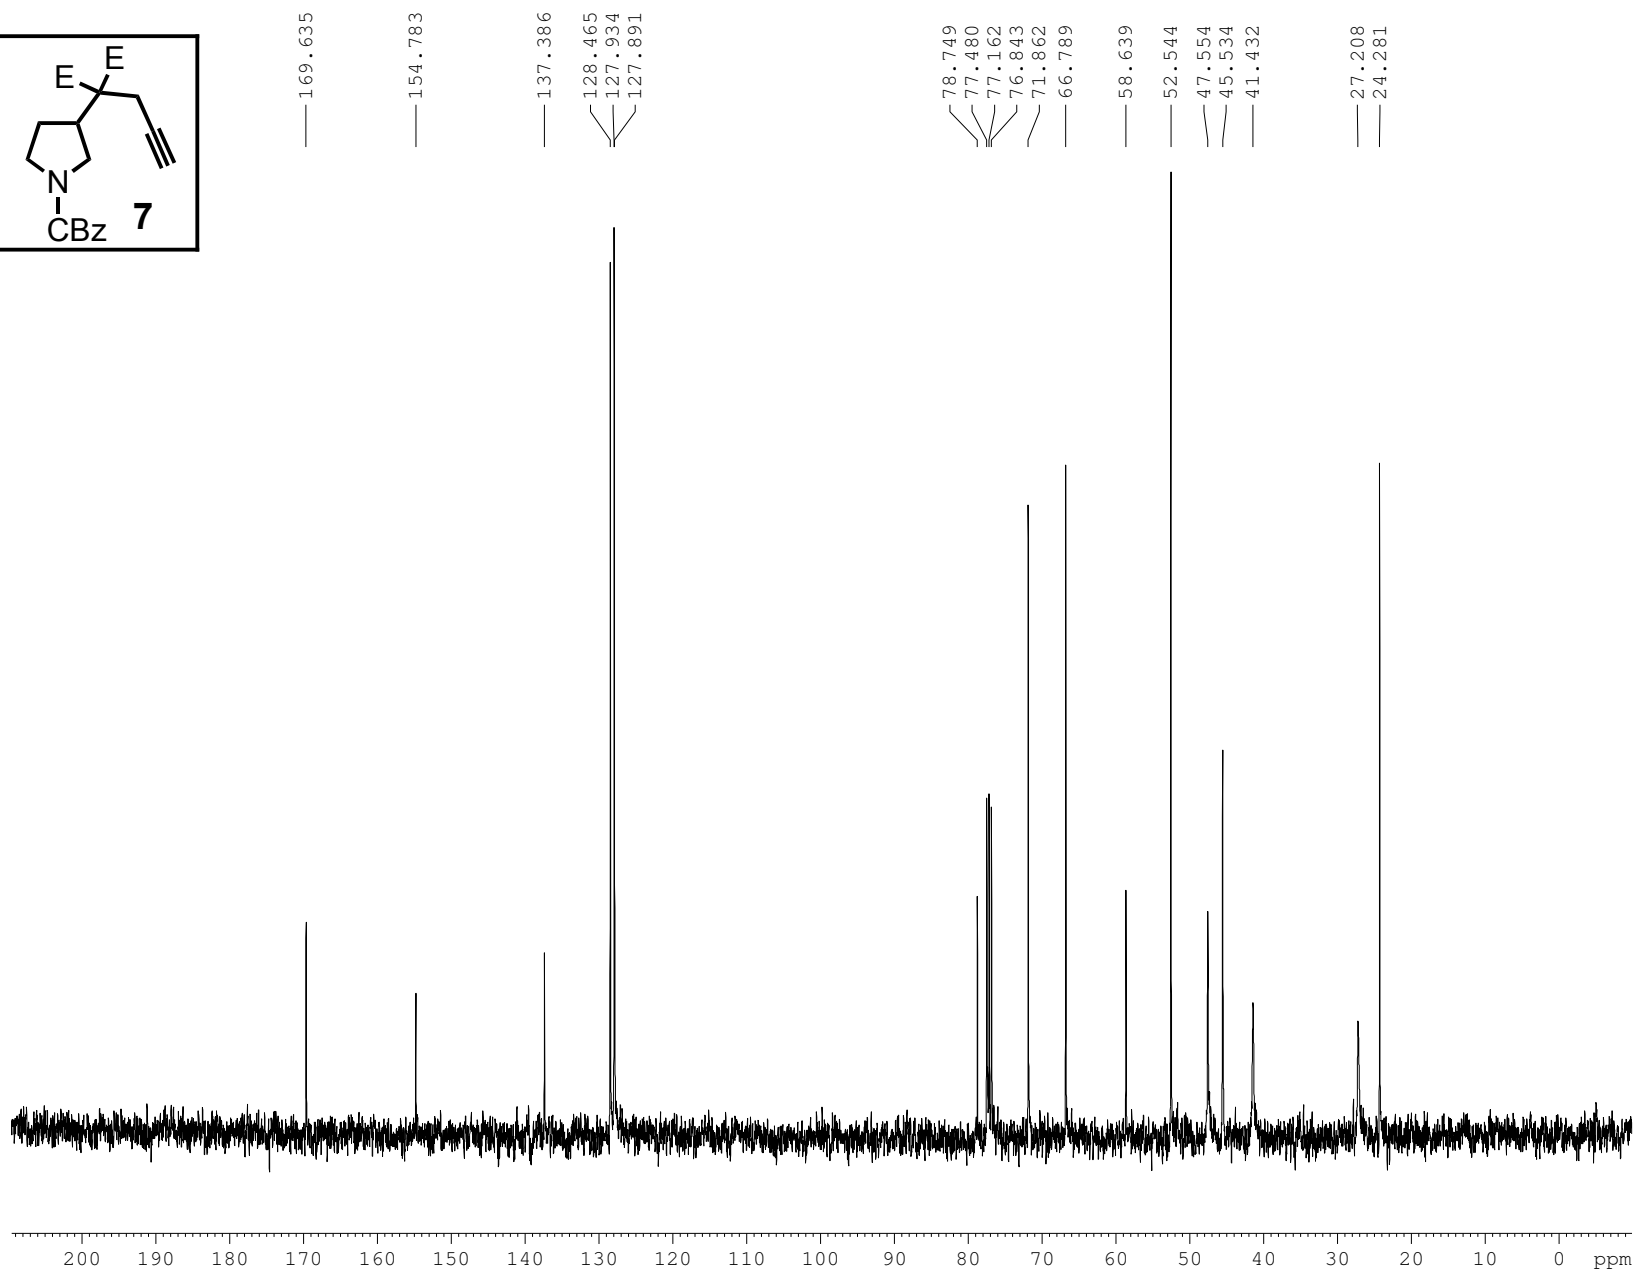

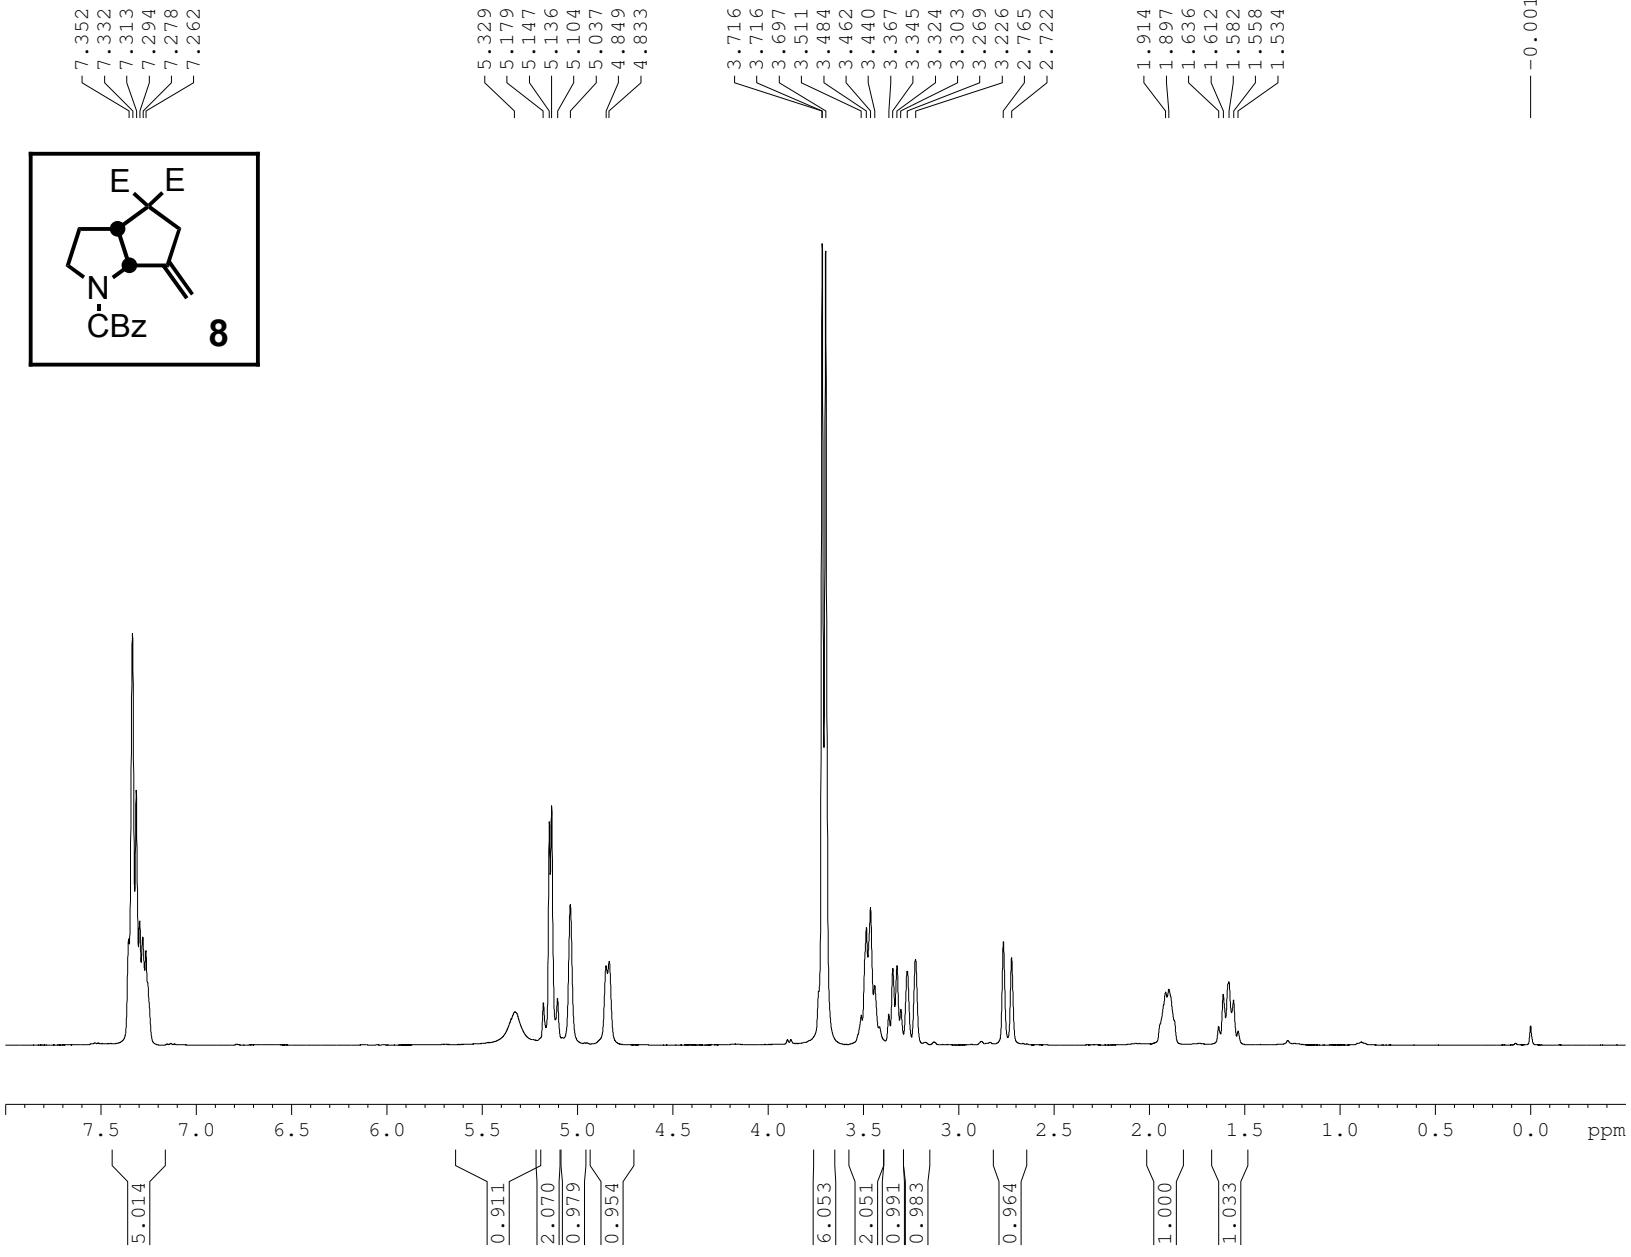

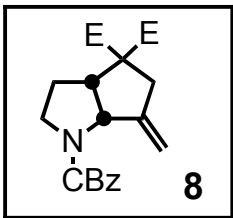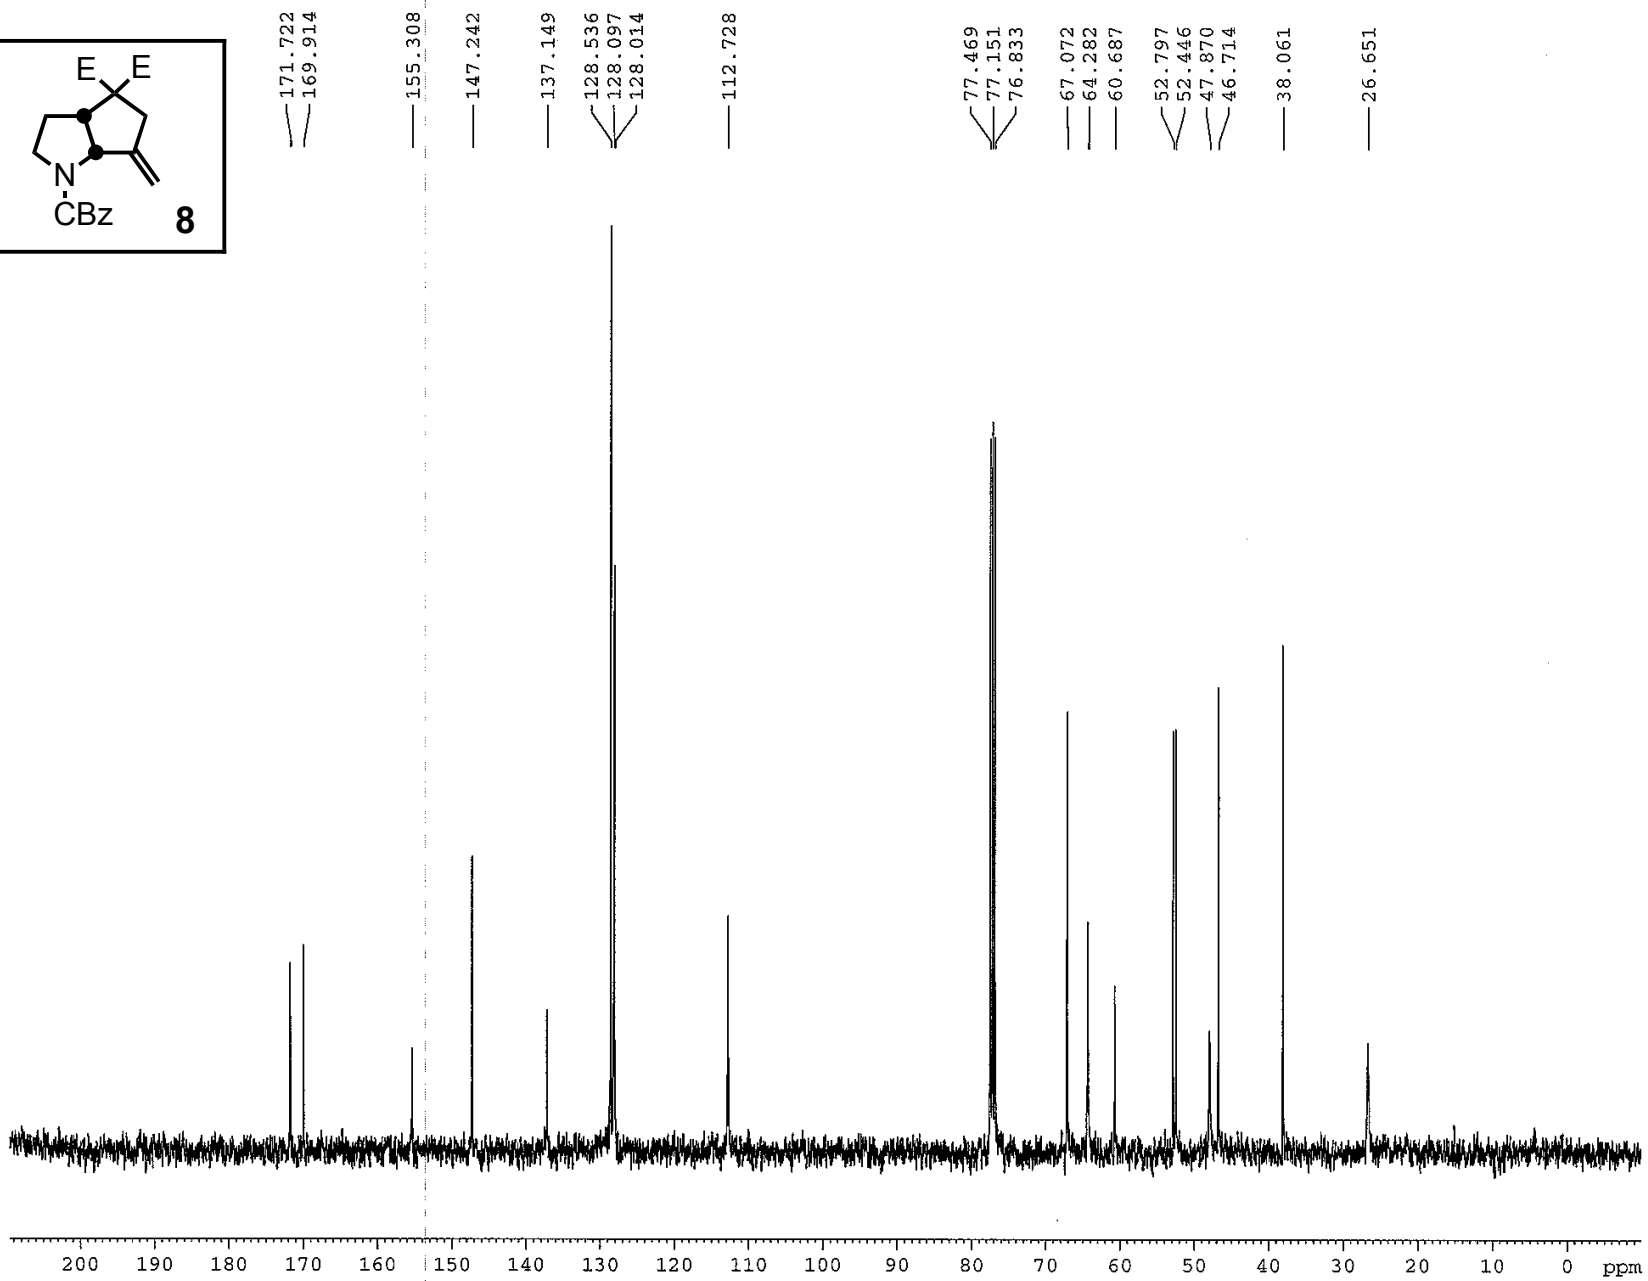

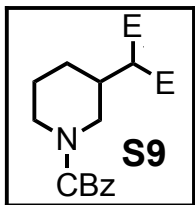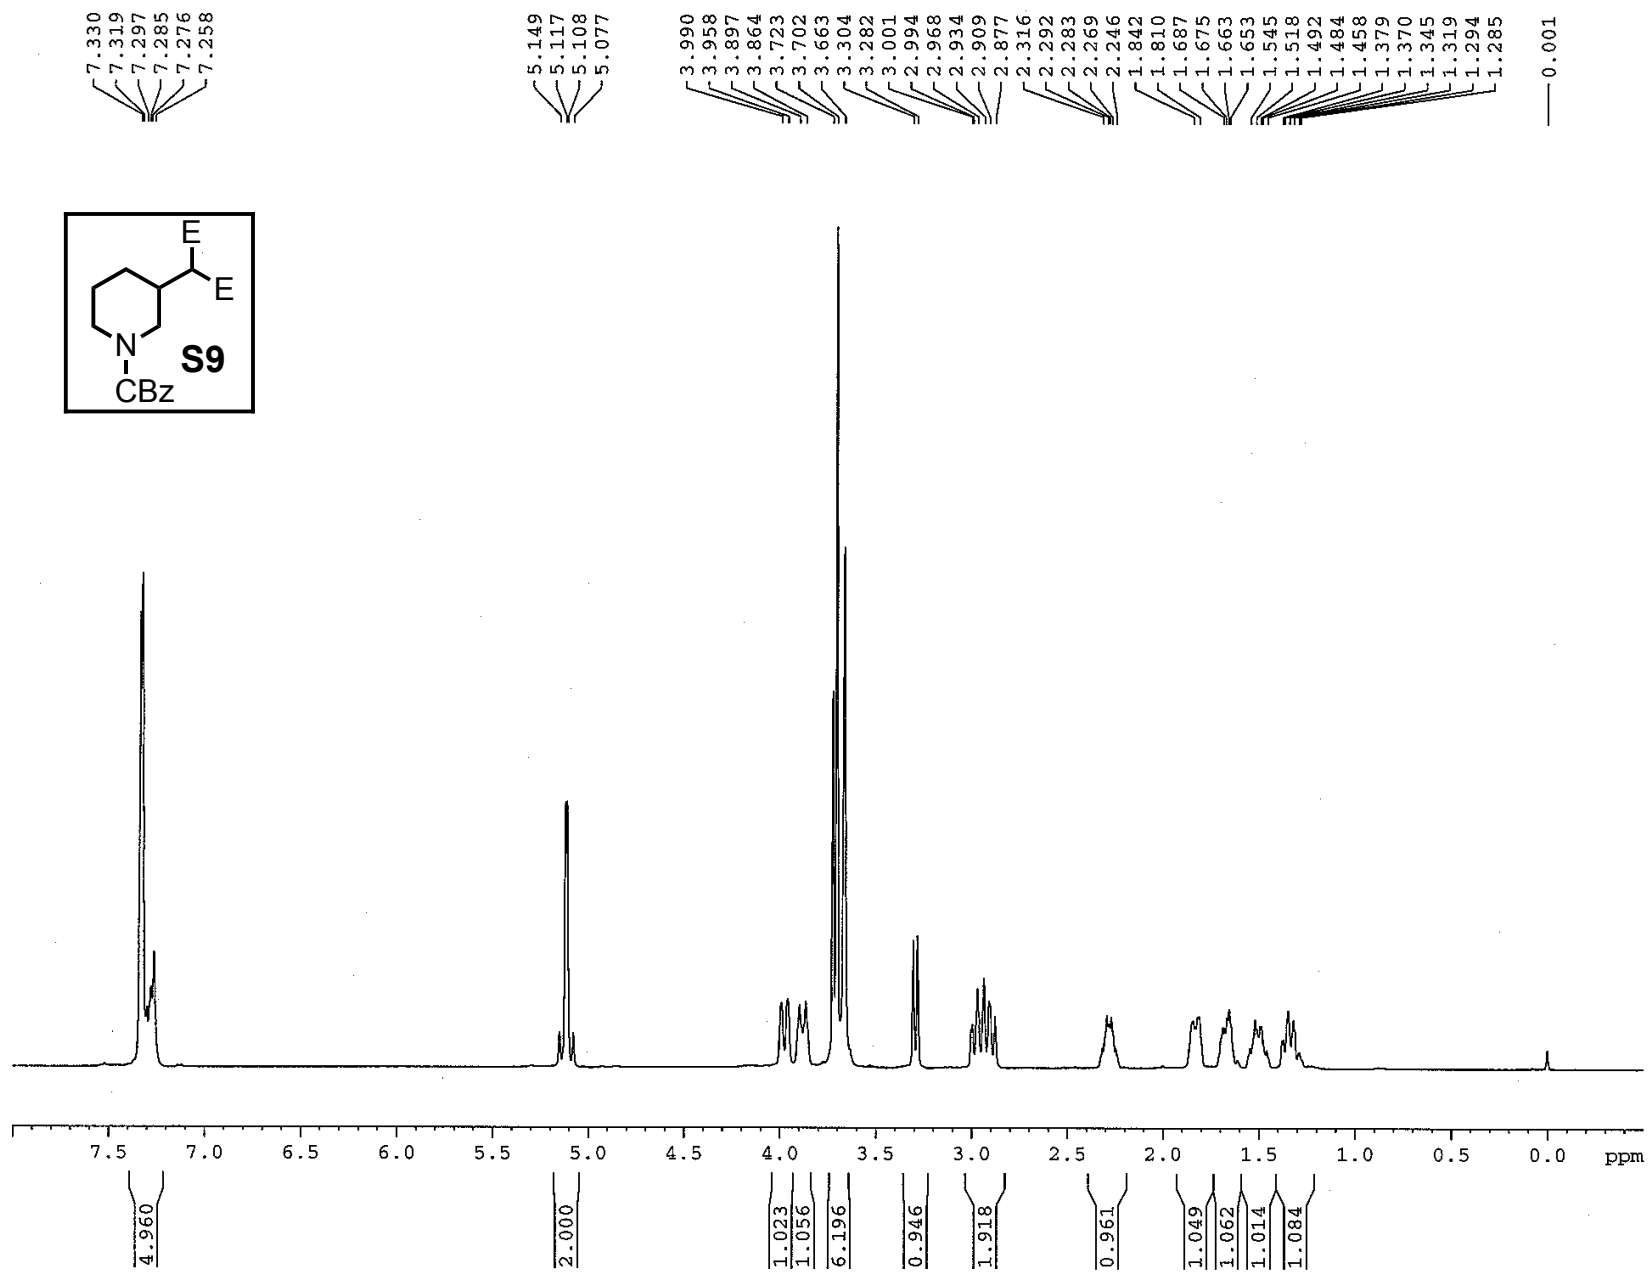

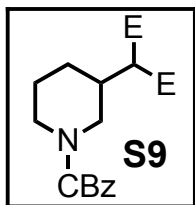

168.452  
168.339

155.364

137.202

128.530  
127.957  
127.850

77.471  
77.353  
76.855

67.222

54.659  
52.264

47.761  
44.656

35.932

28.376  
24.431

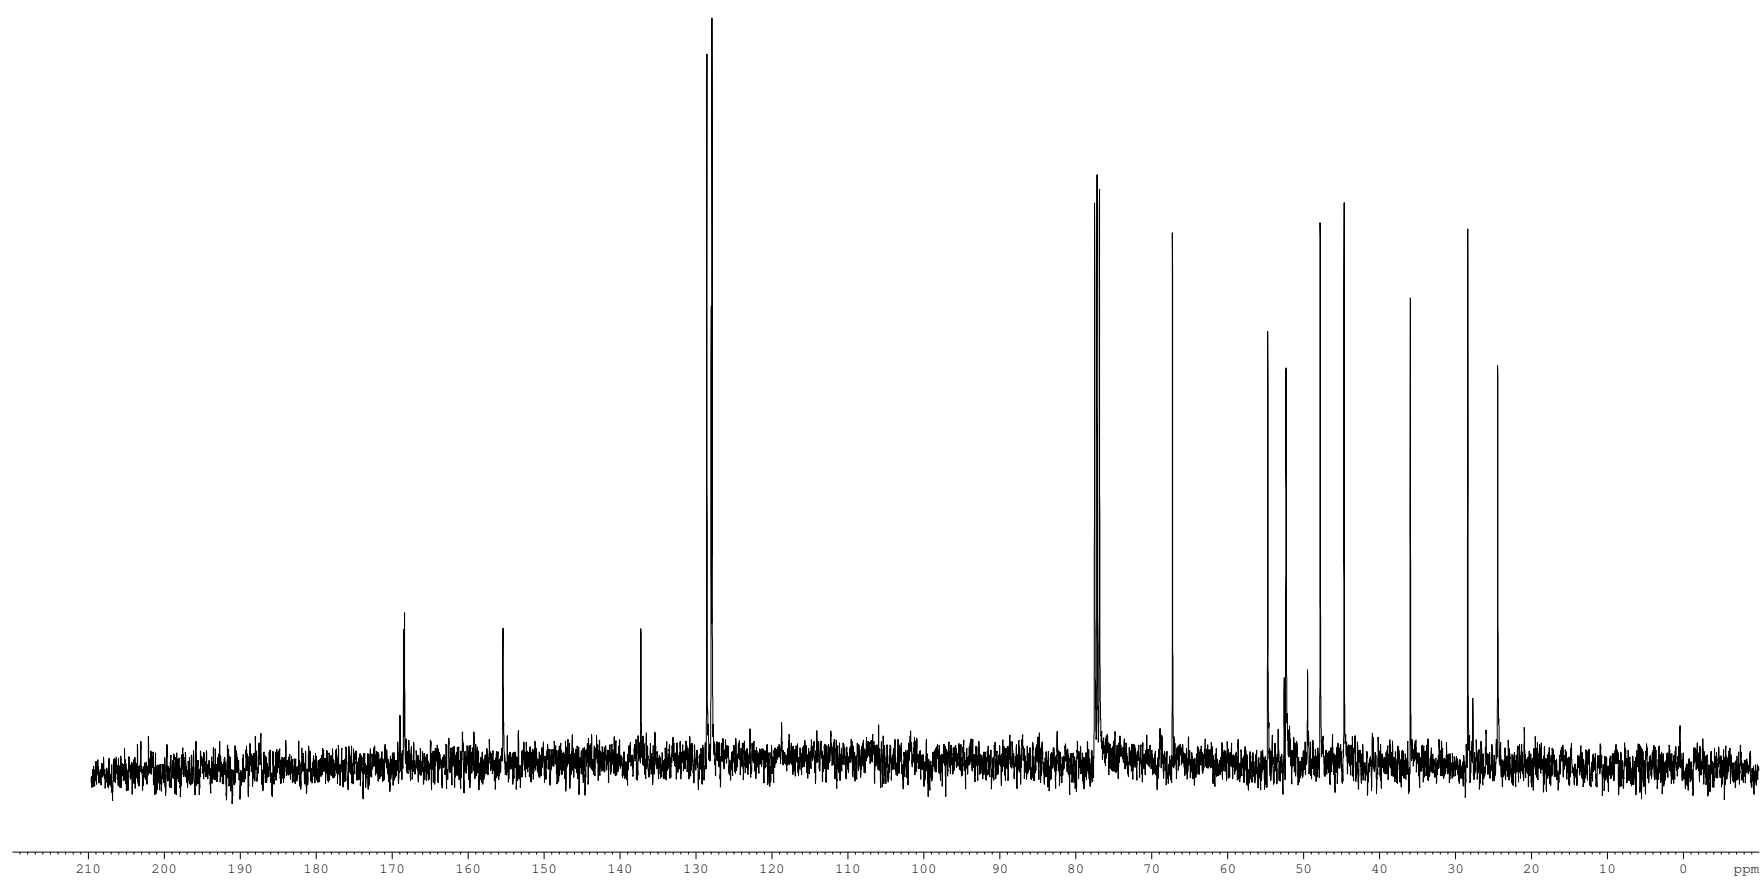



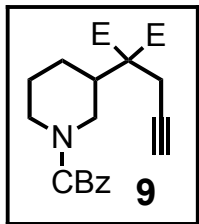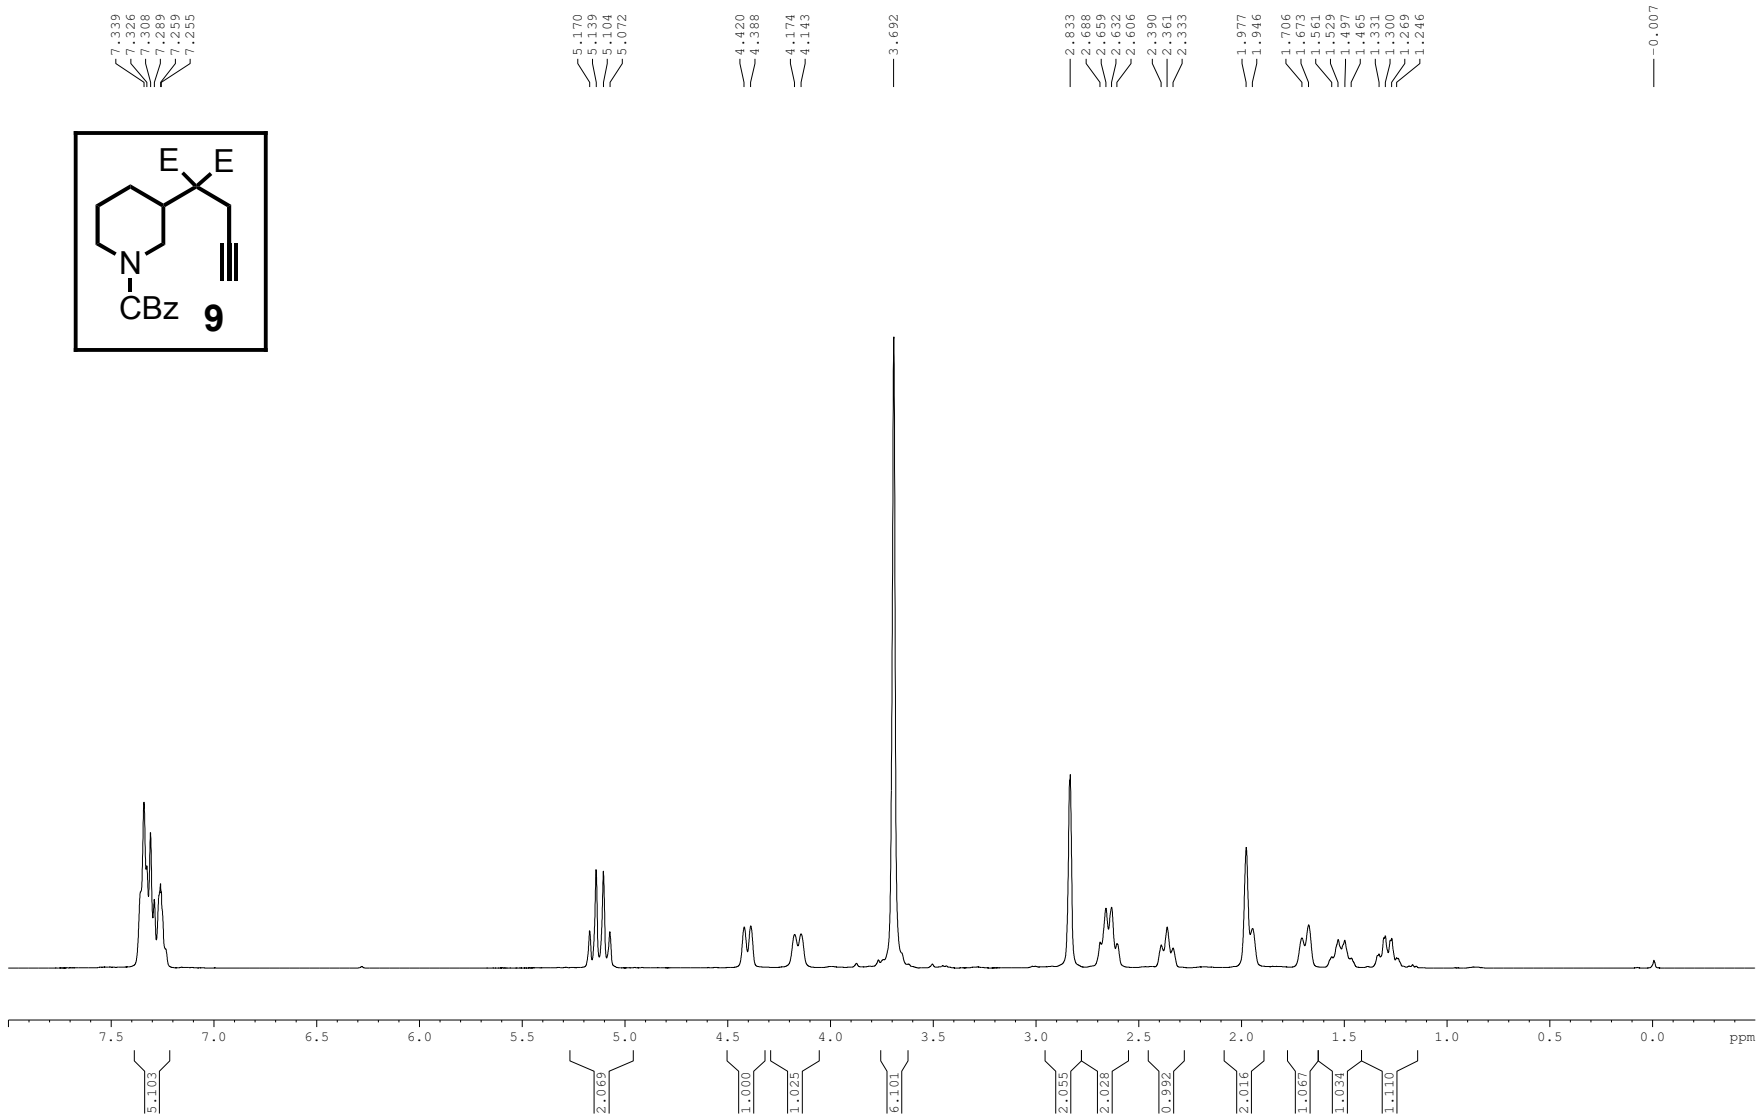

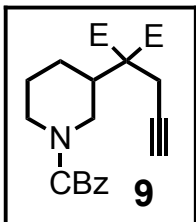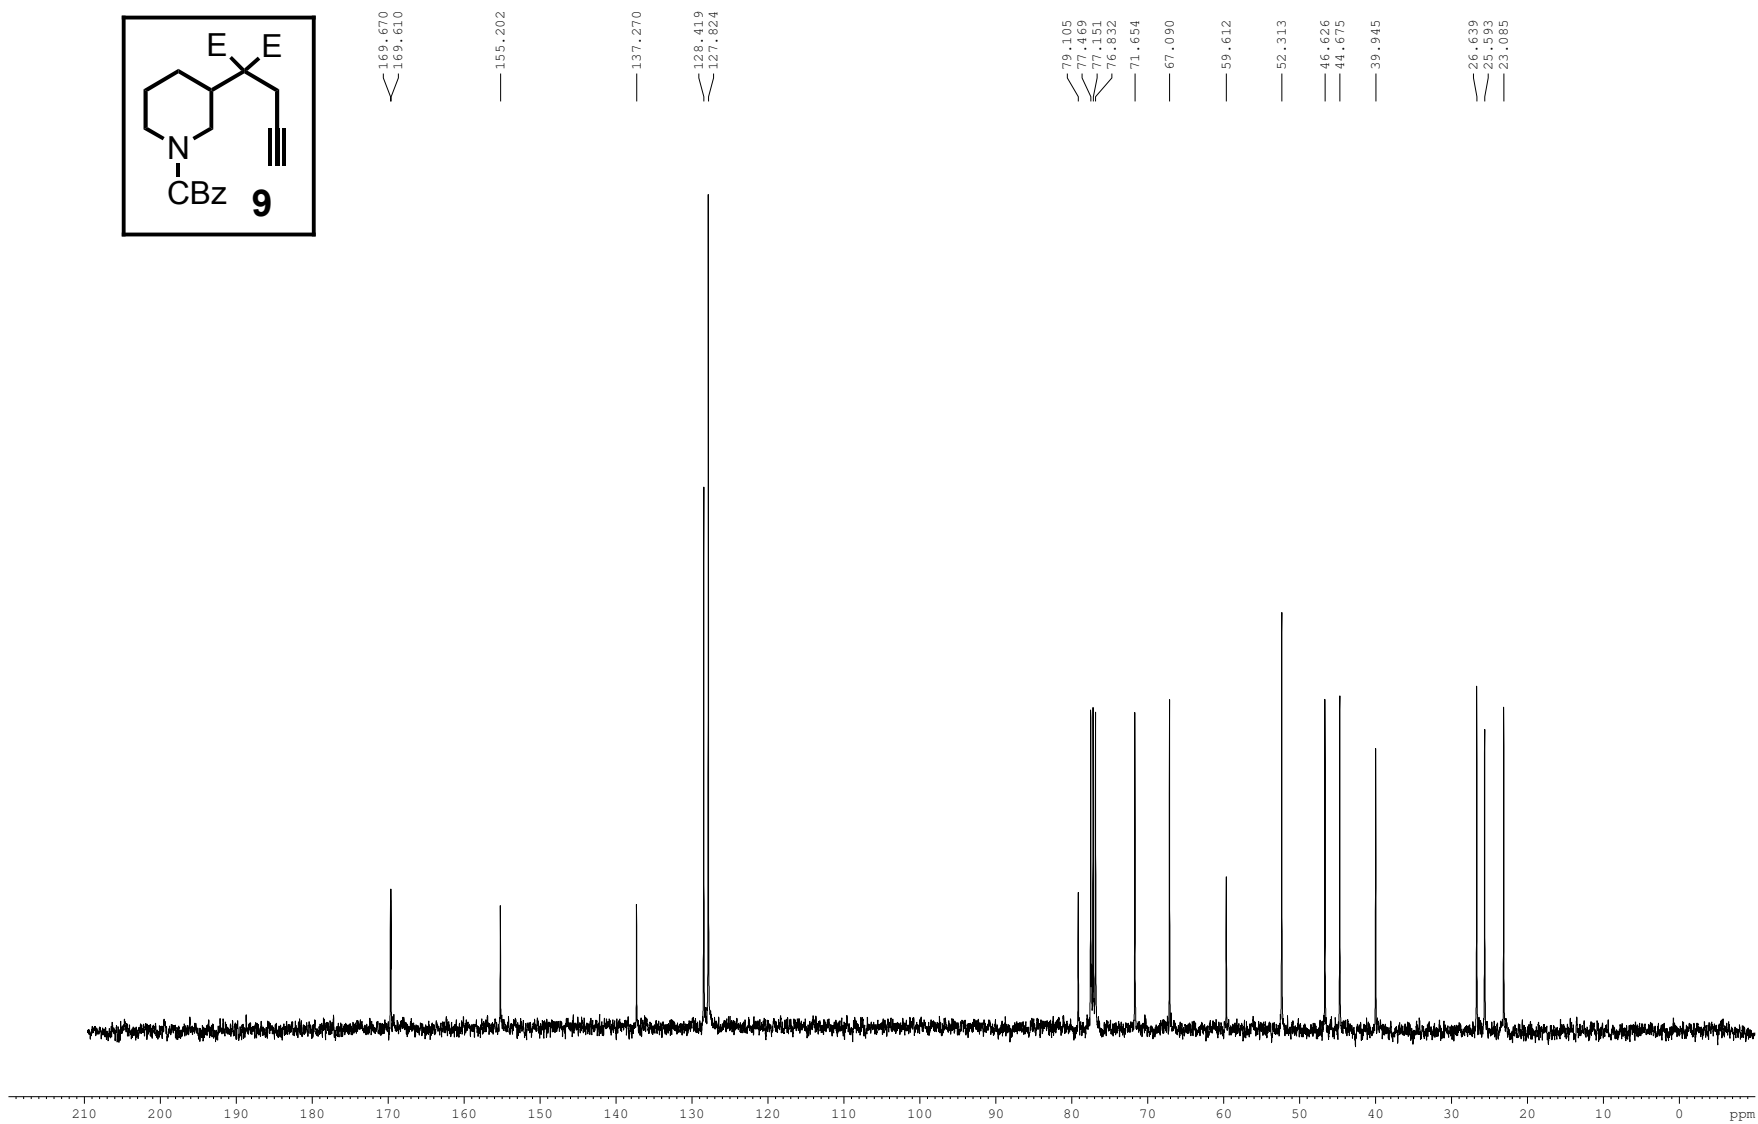

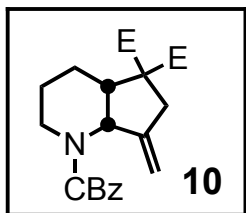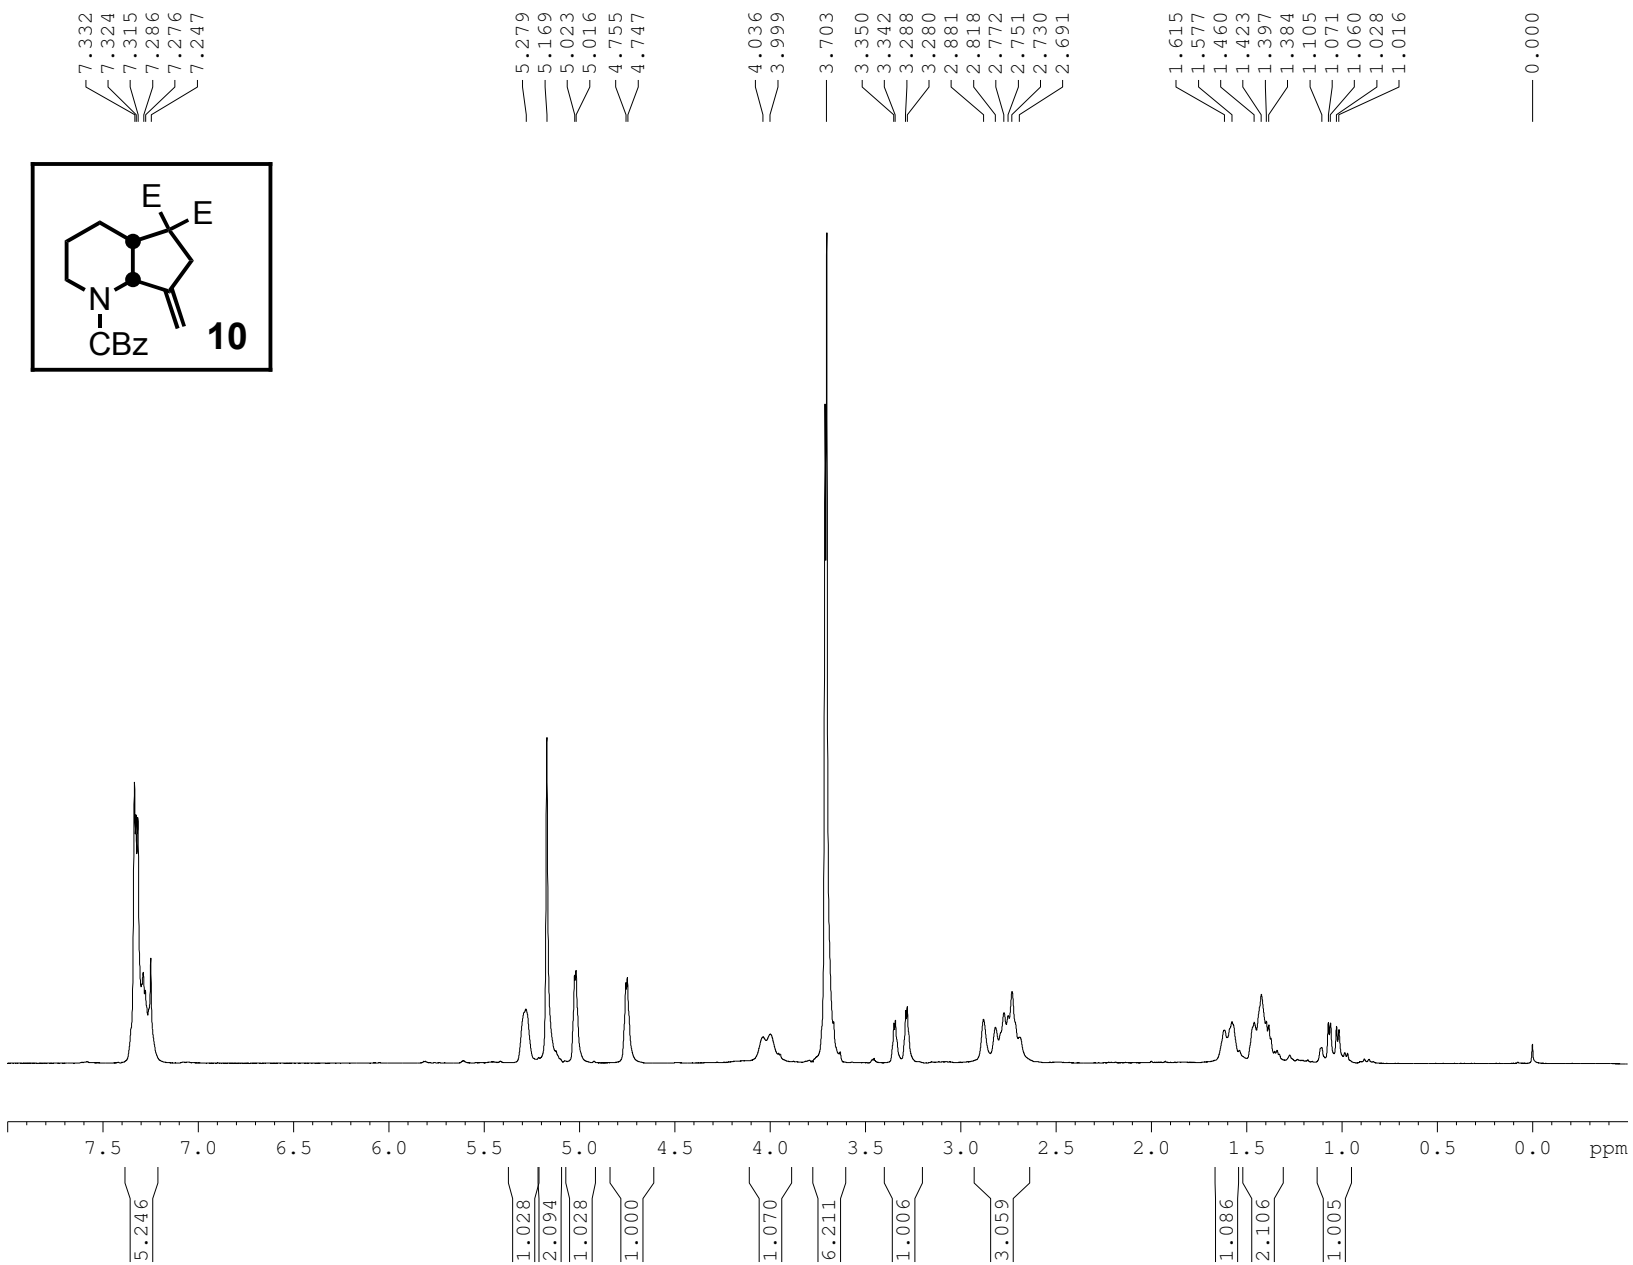

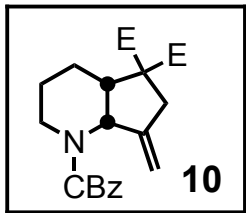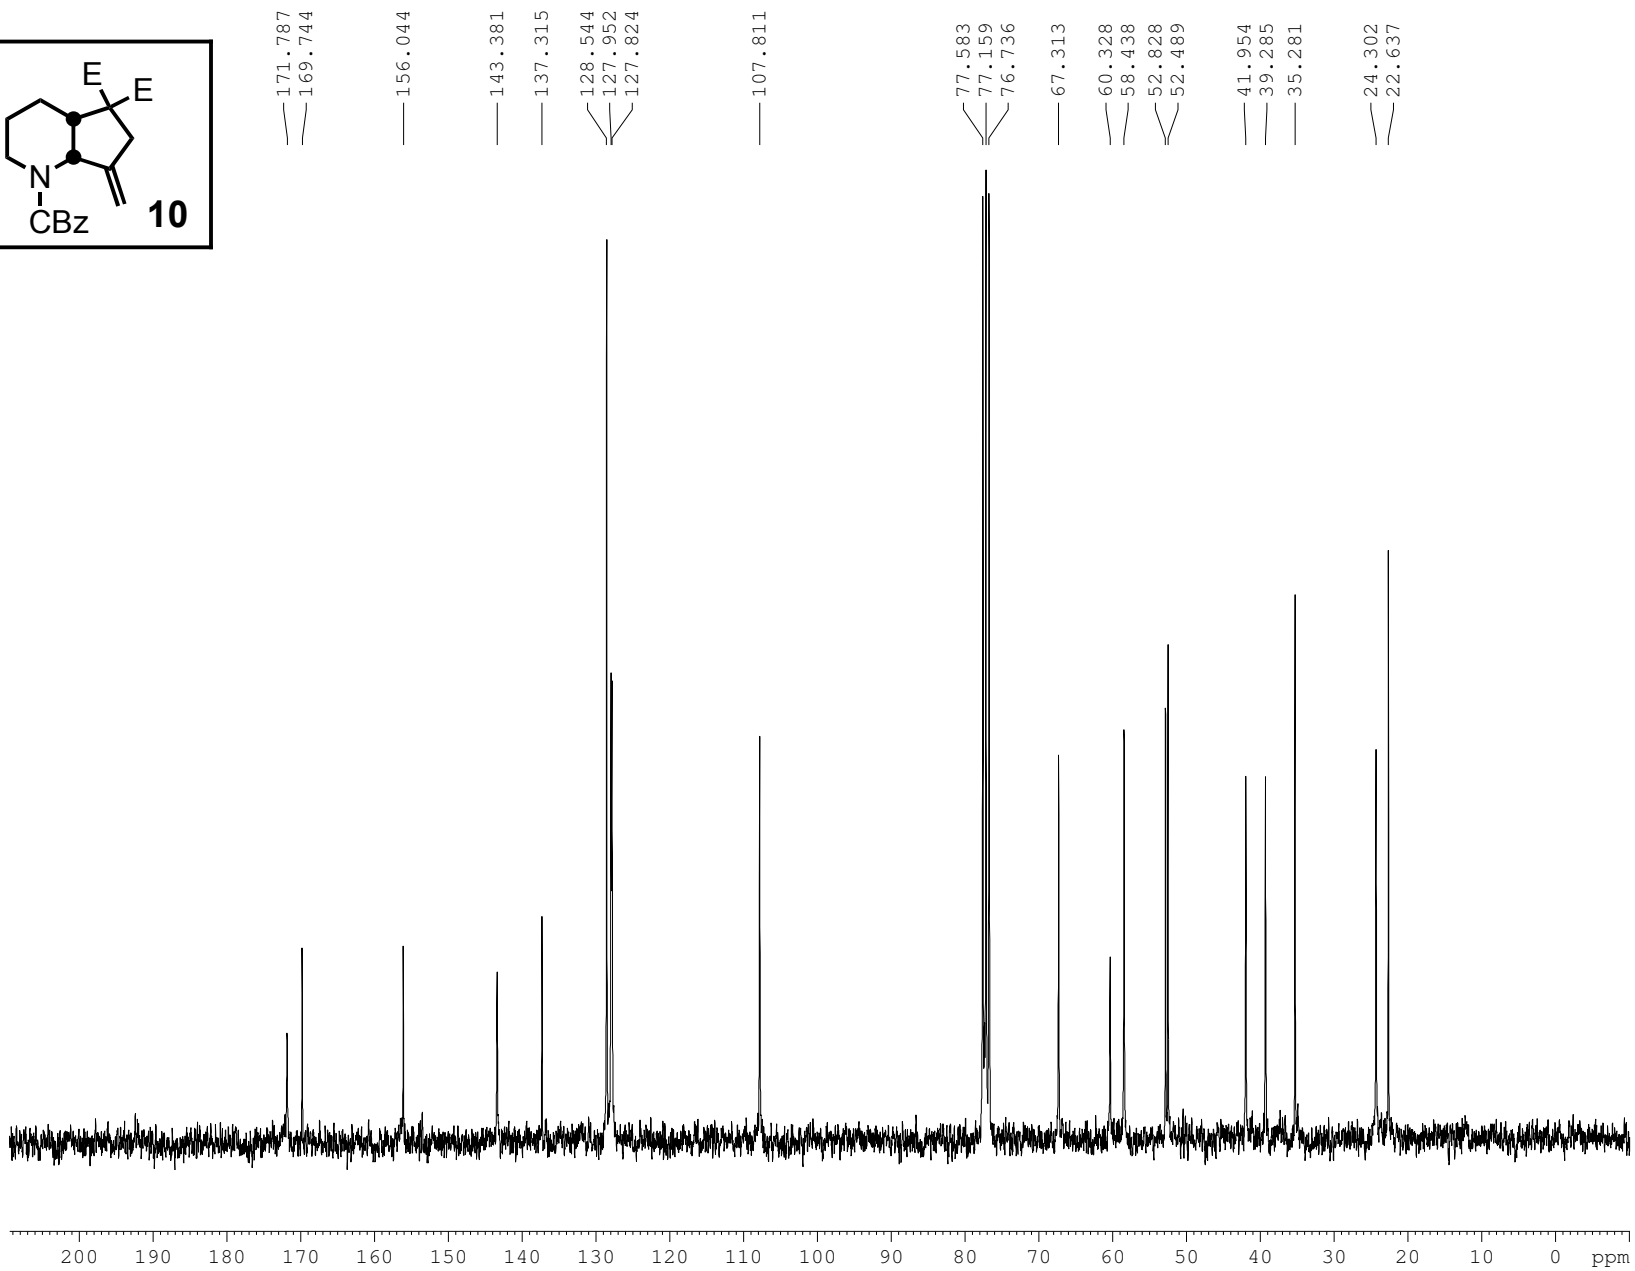

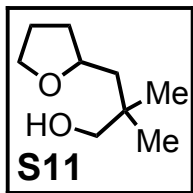

— 7.287

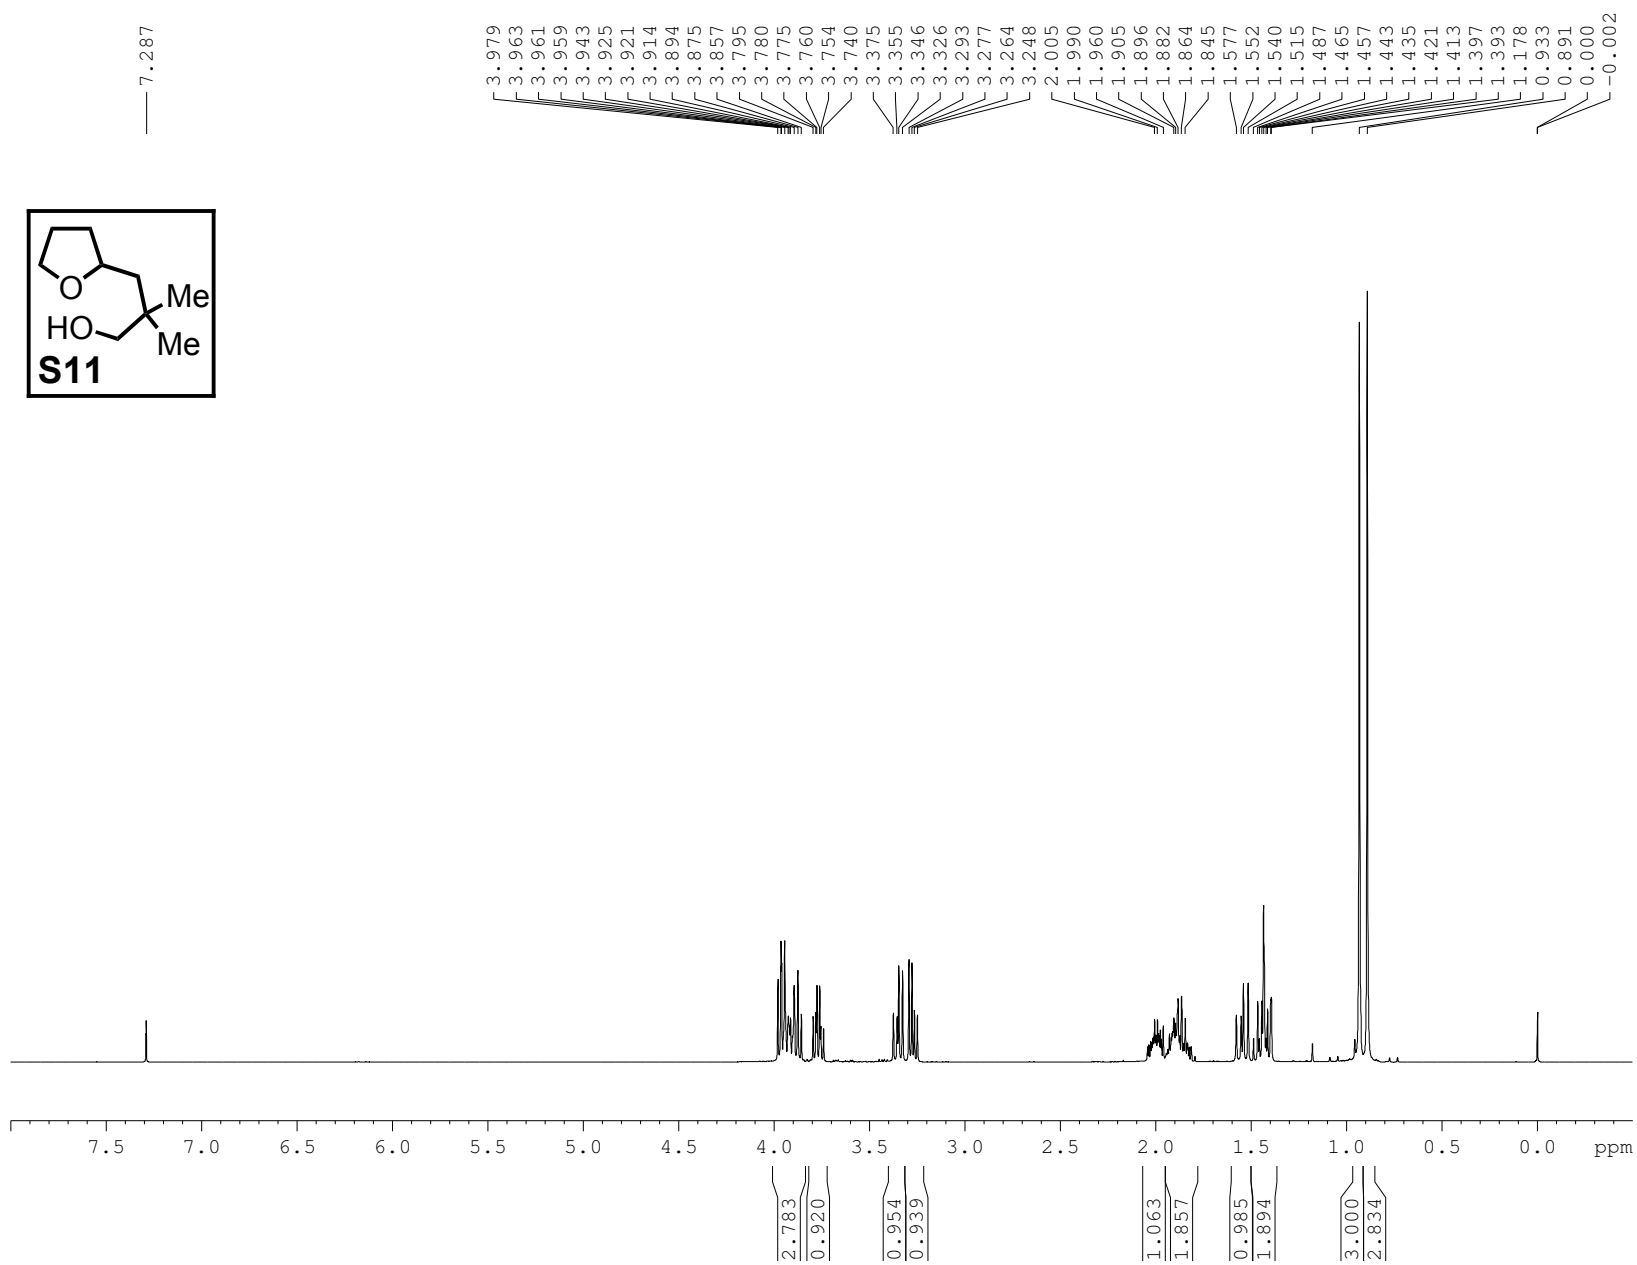

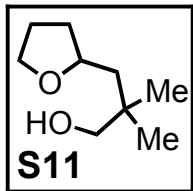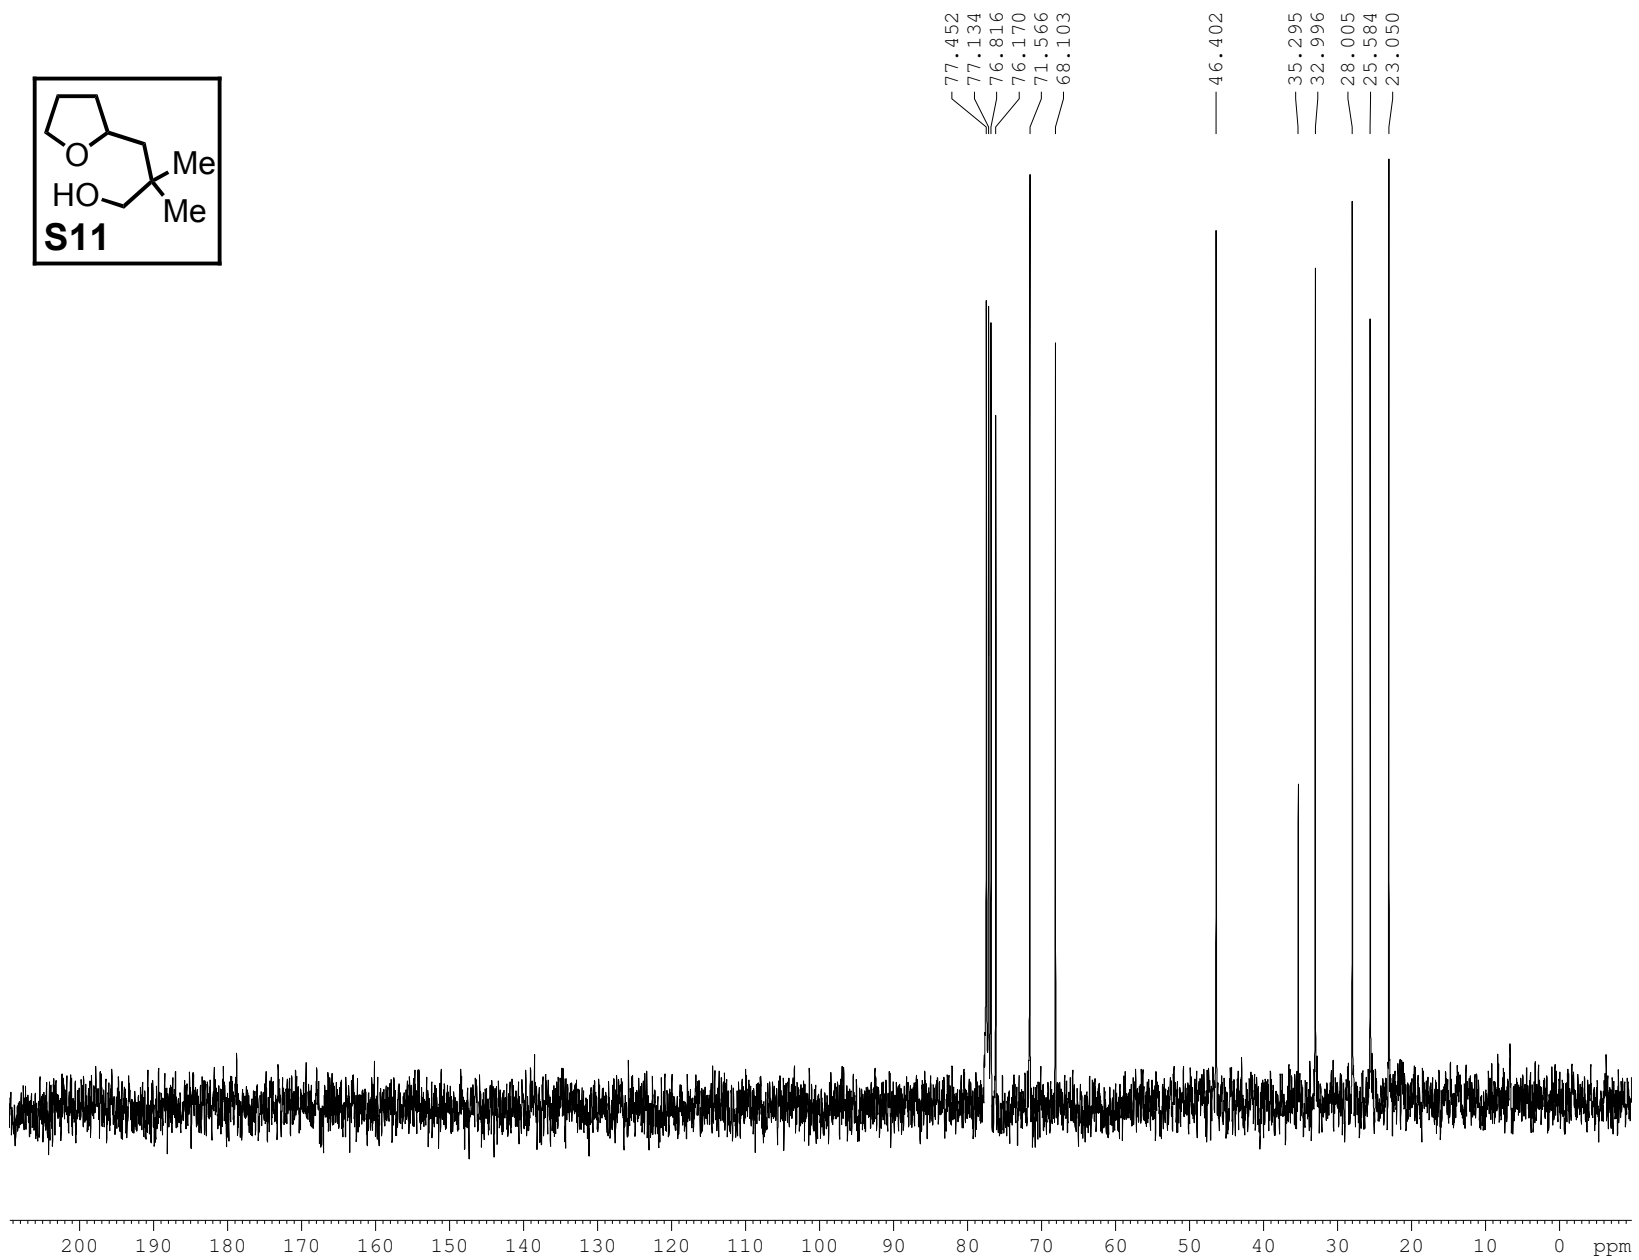

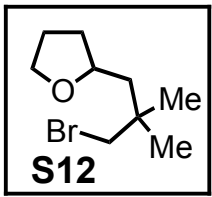

7.271

6.838

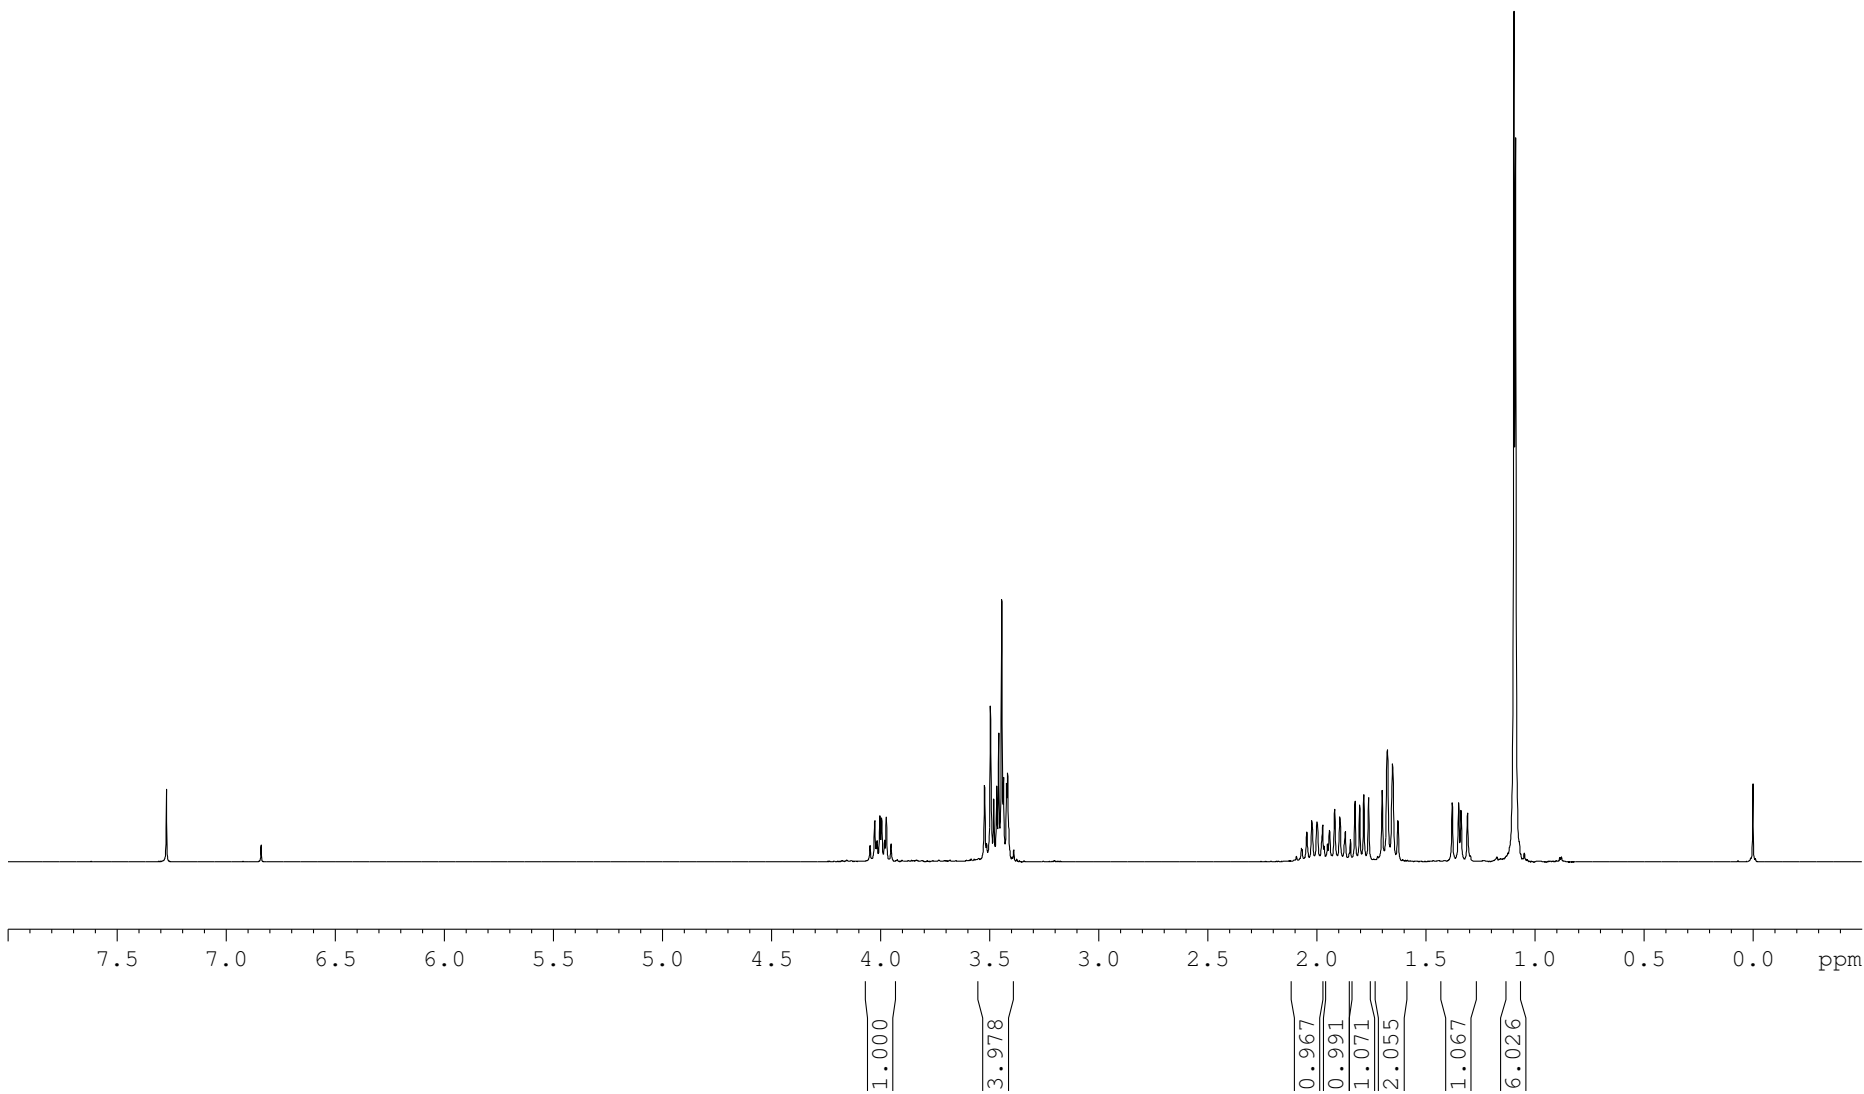

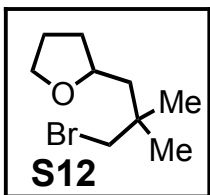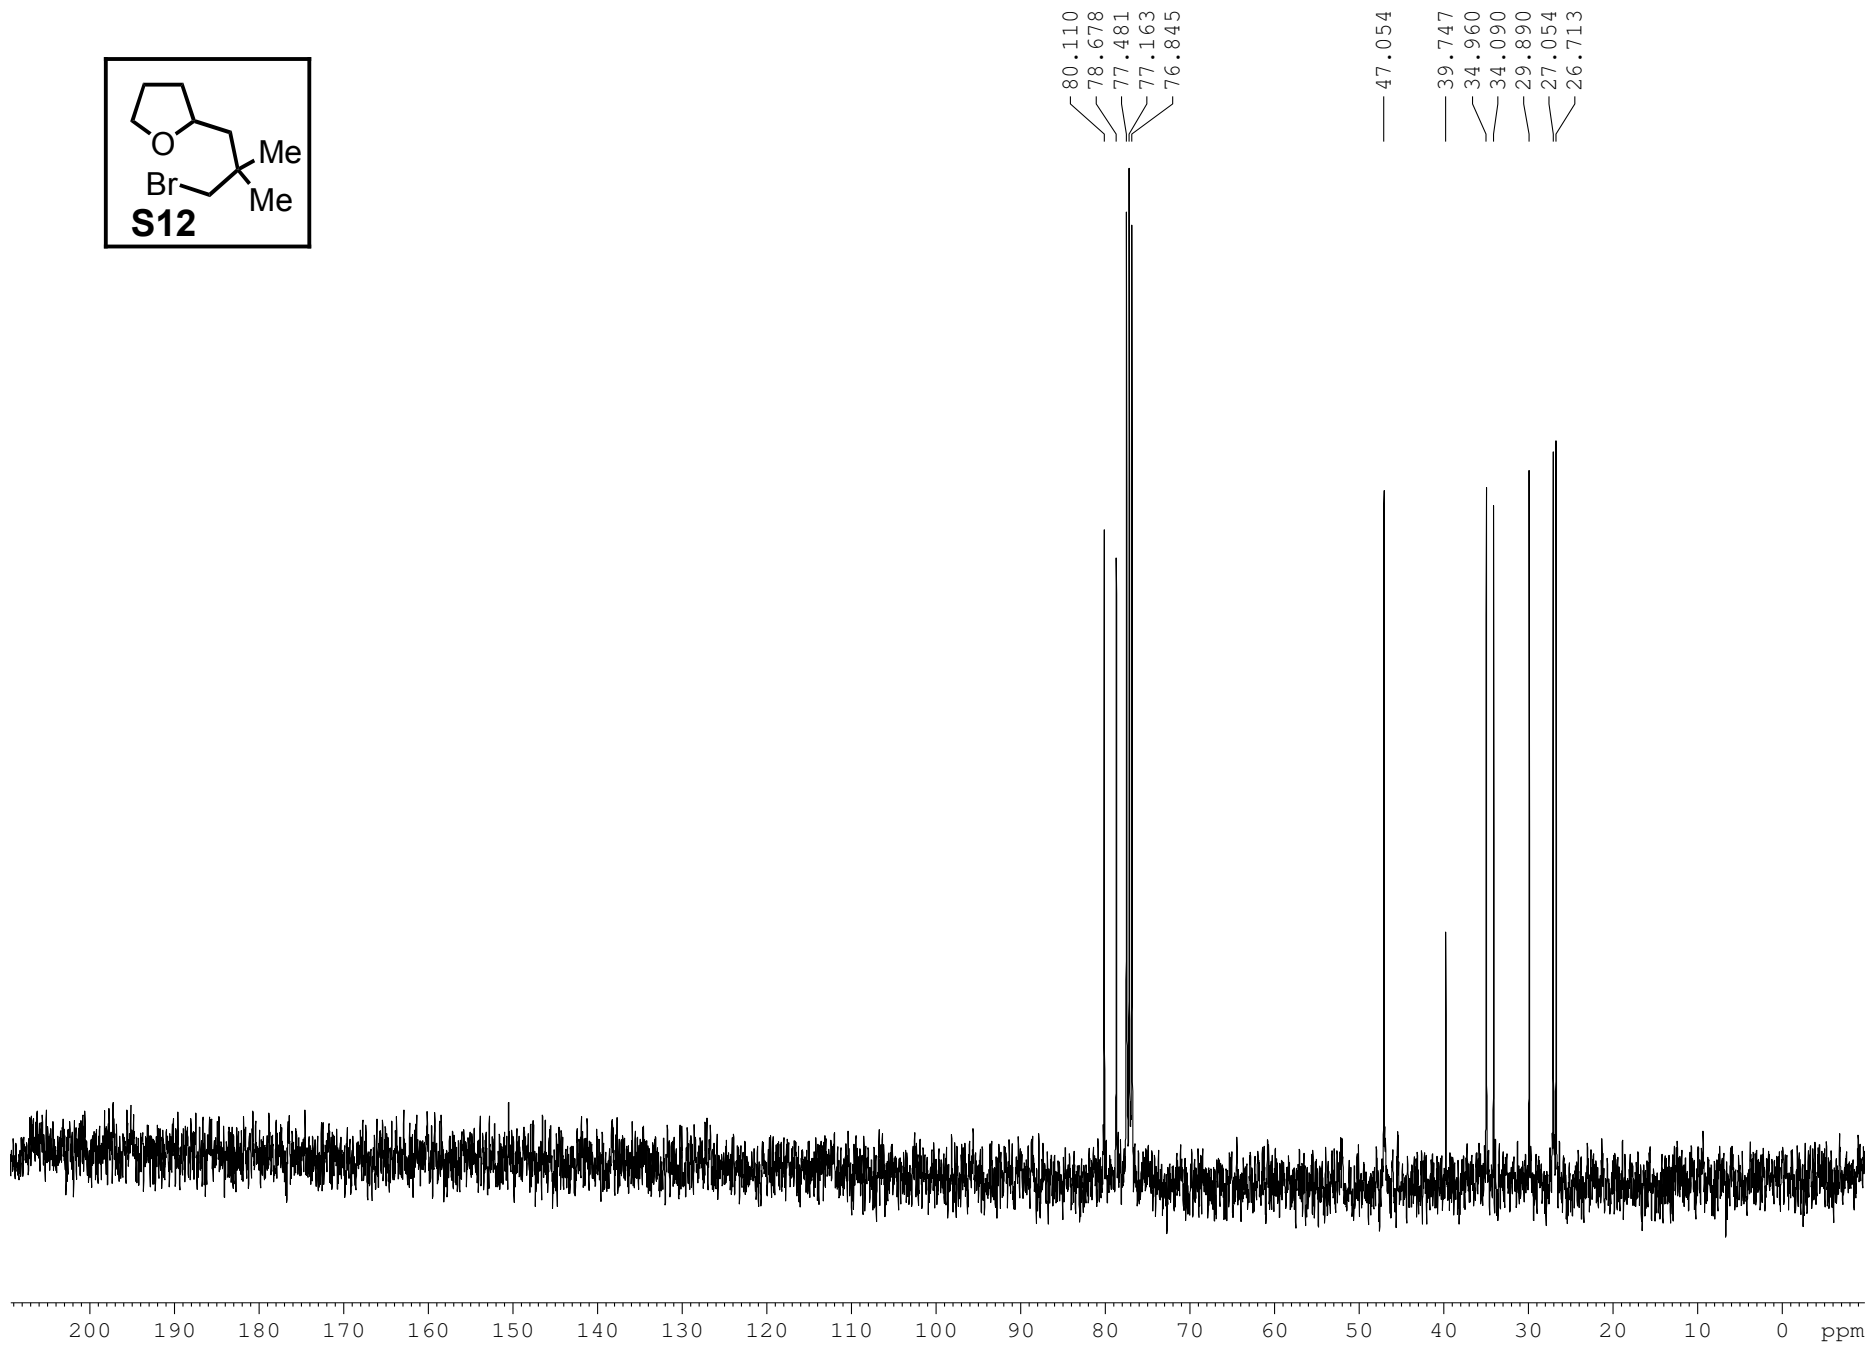



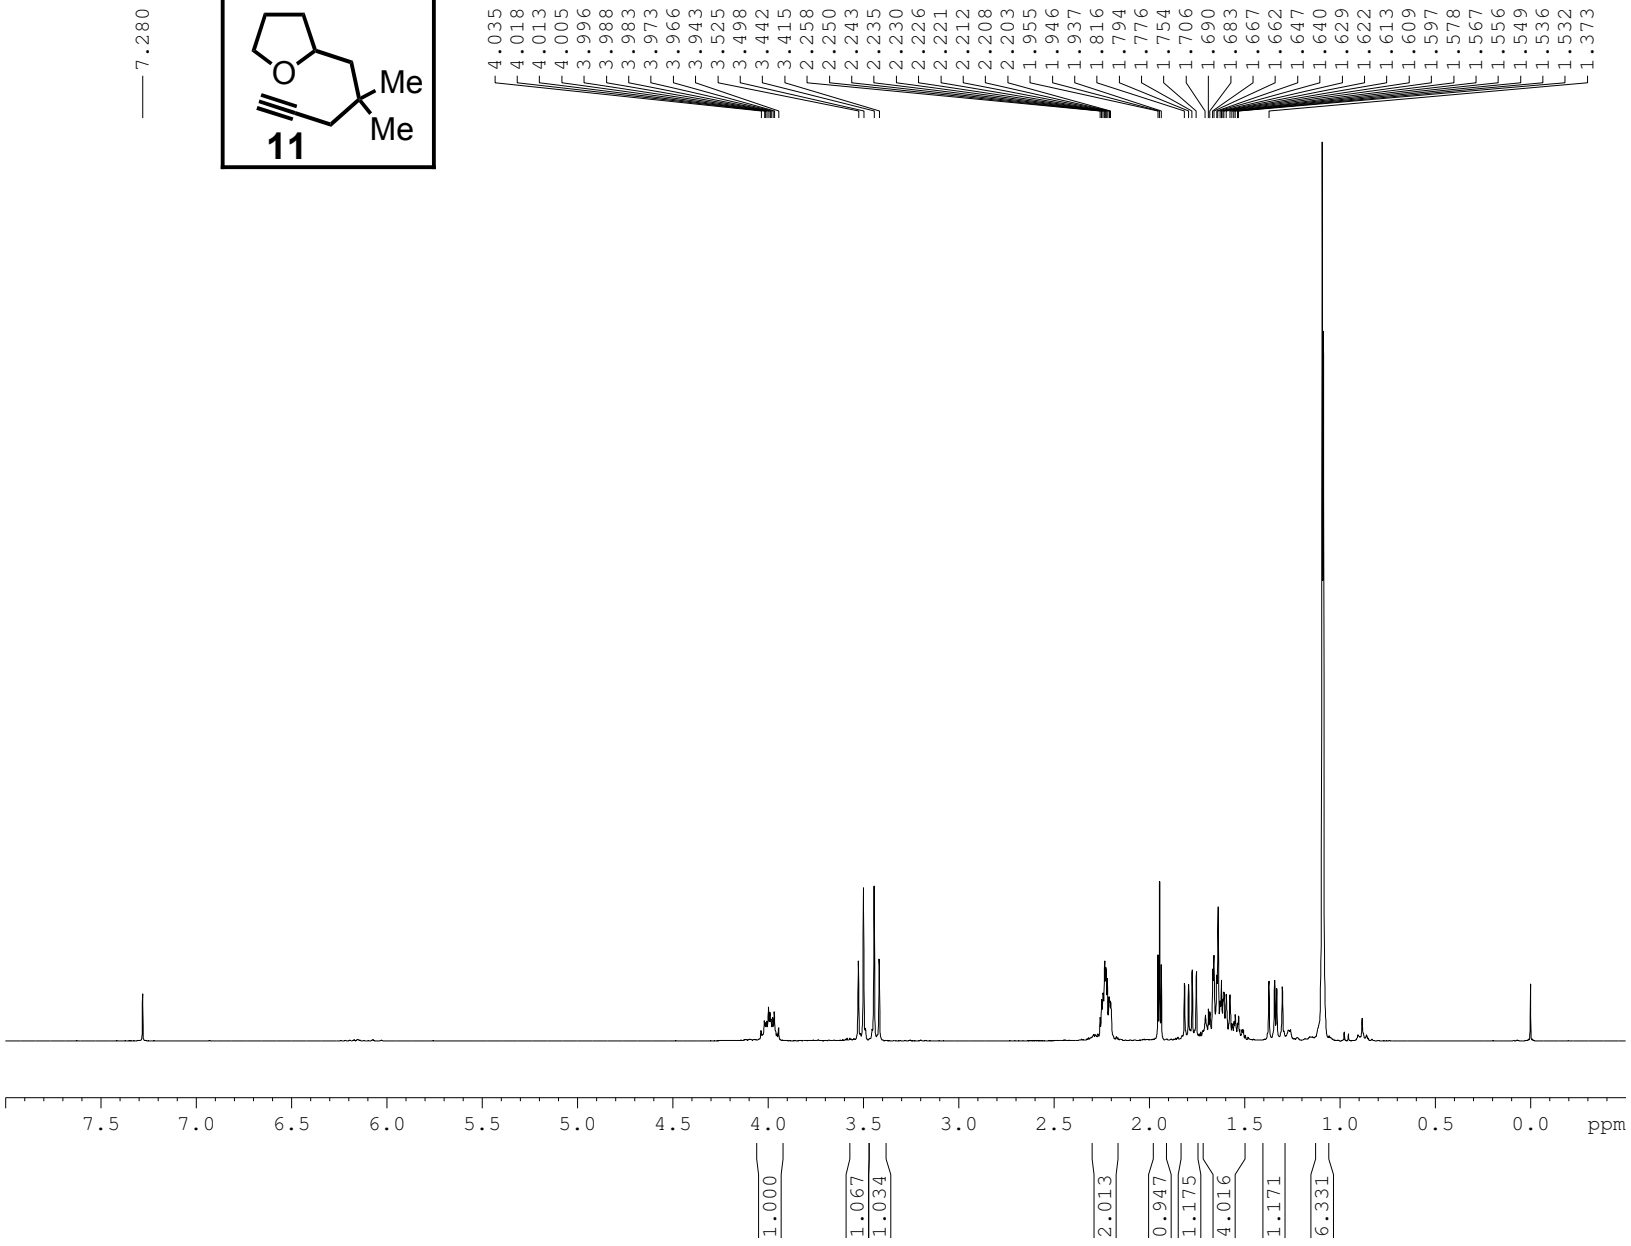

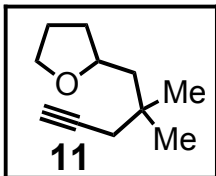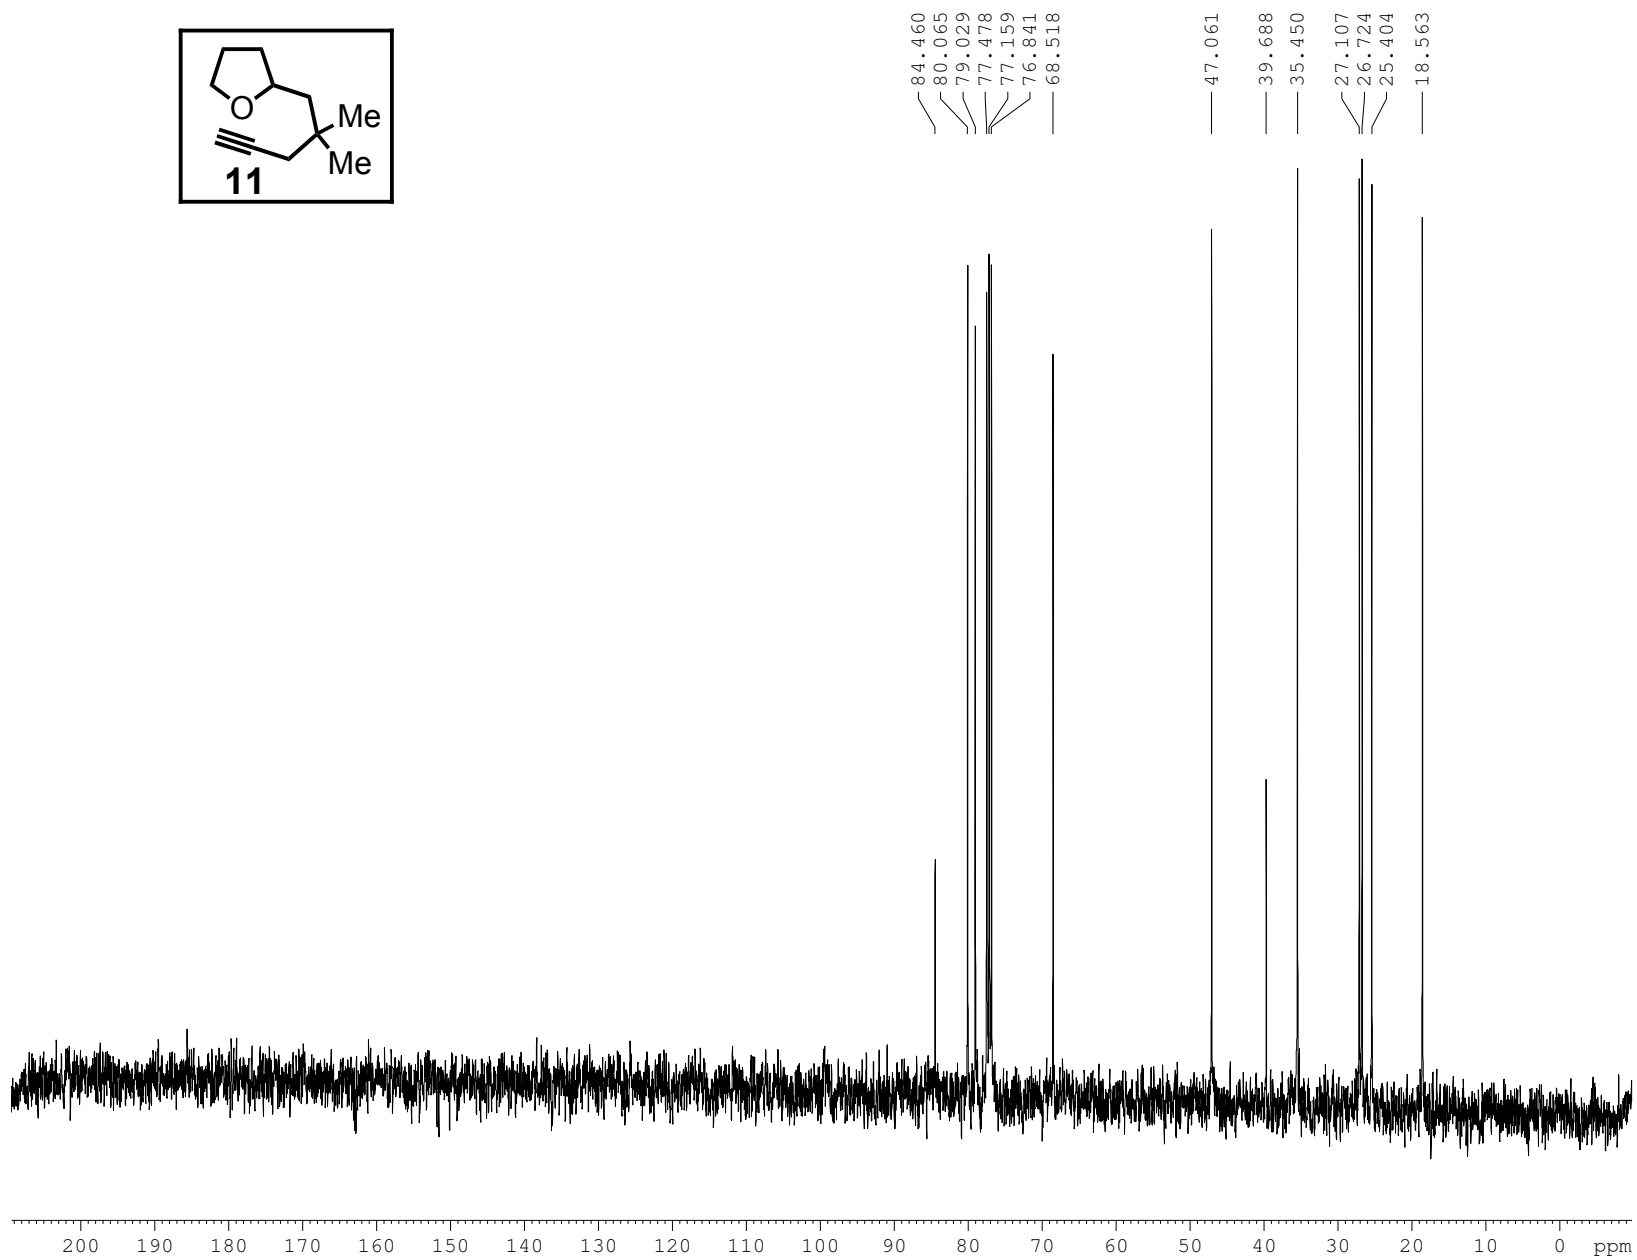

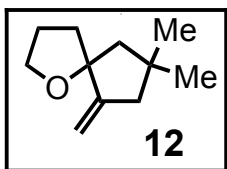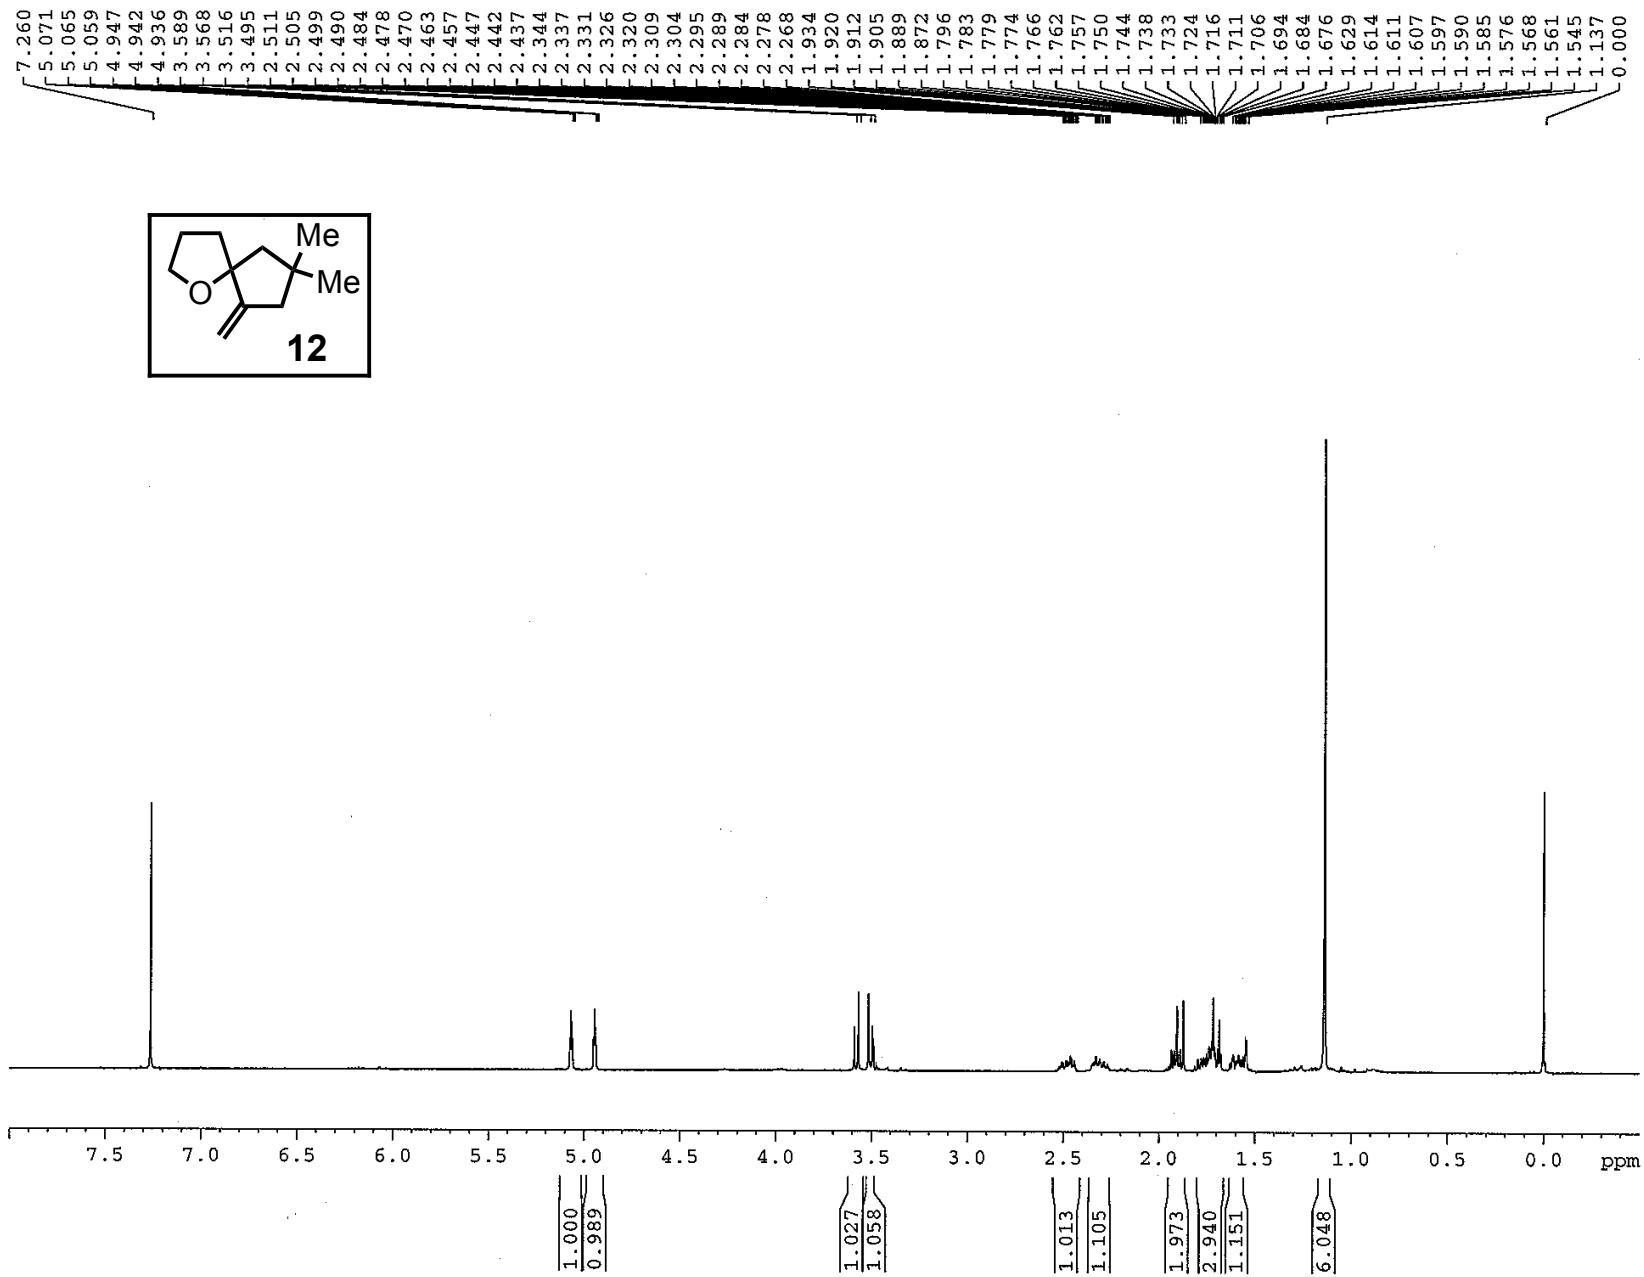

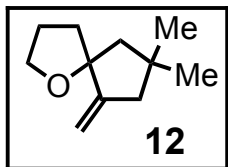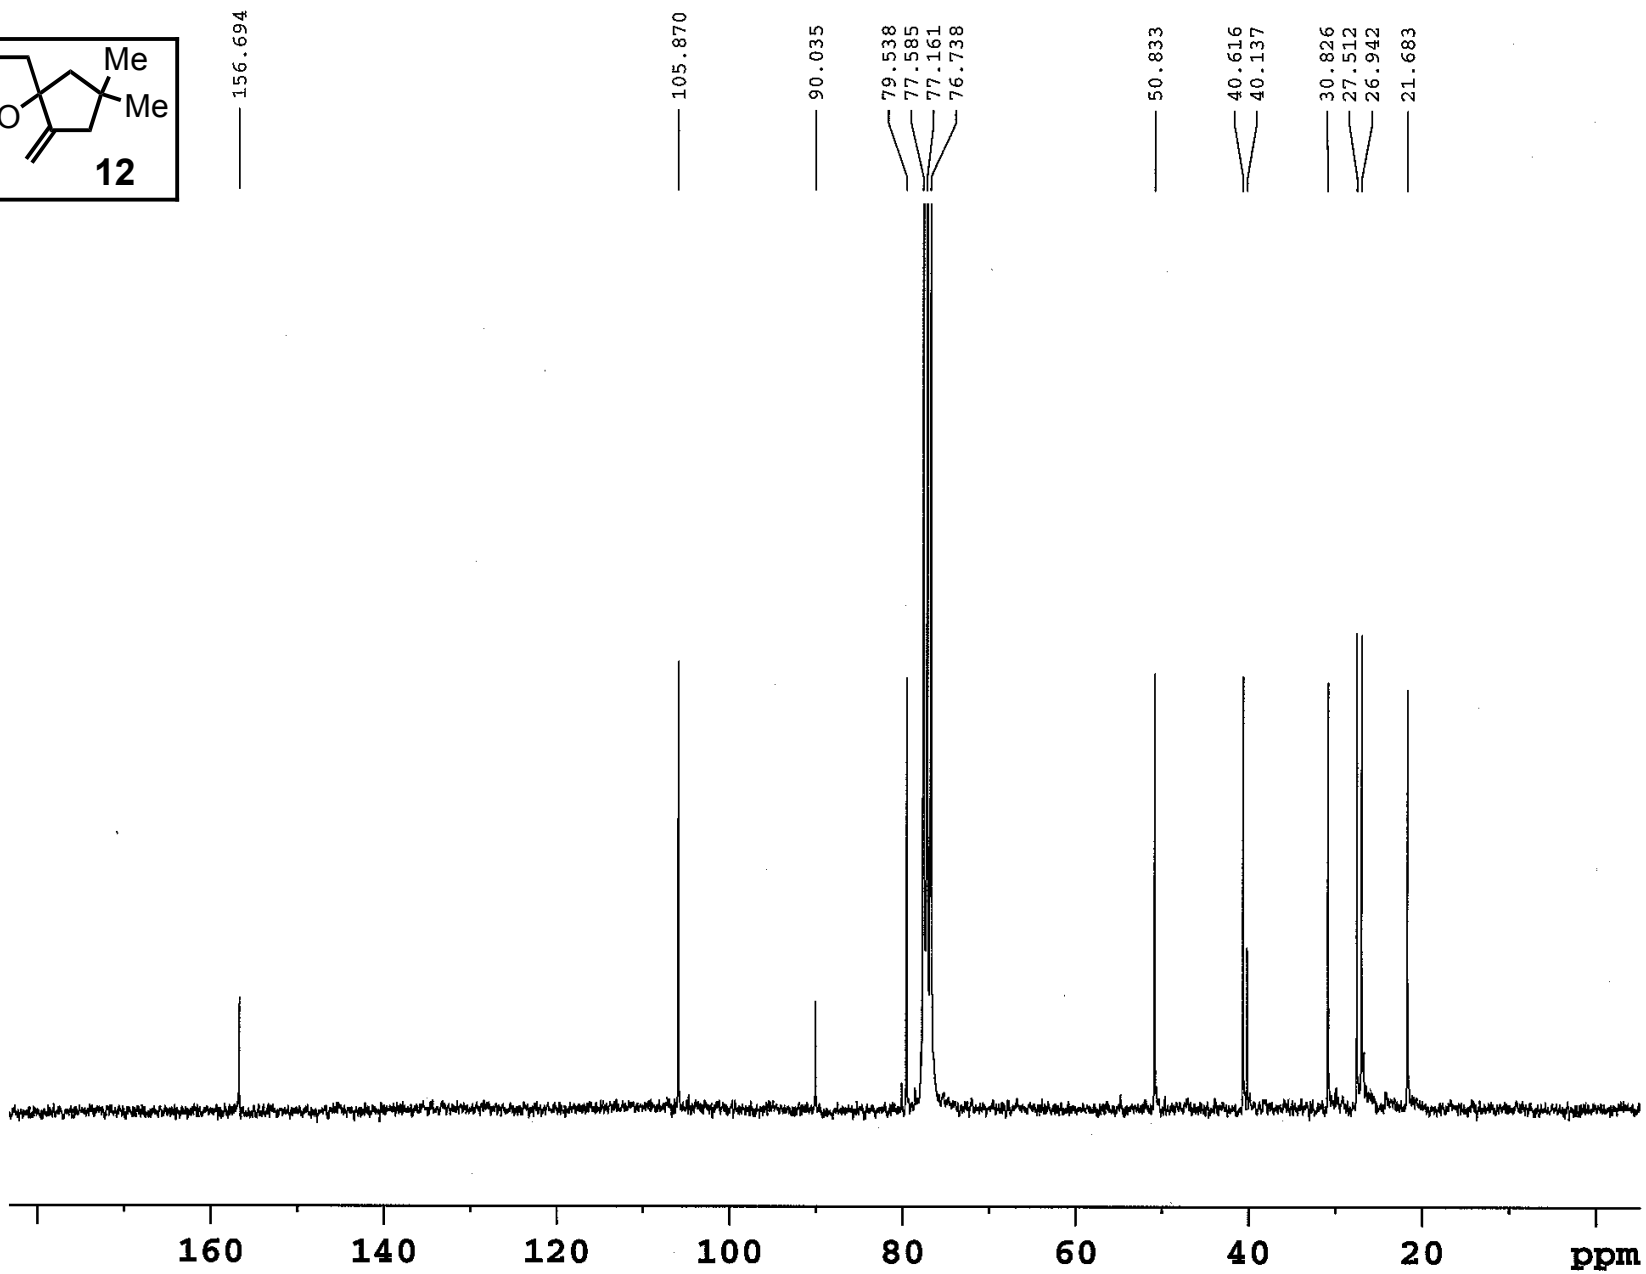

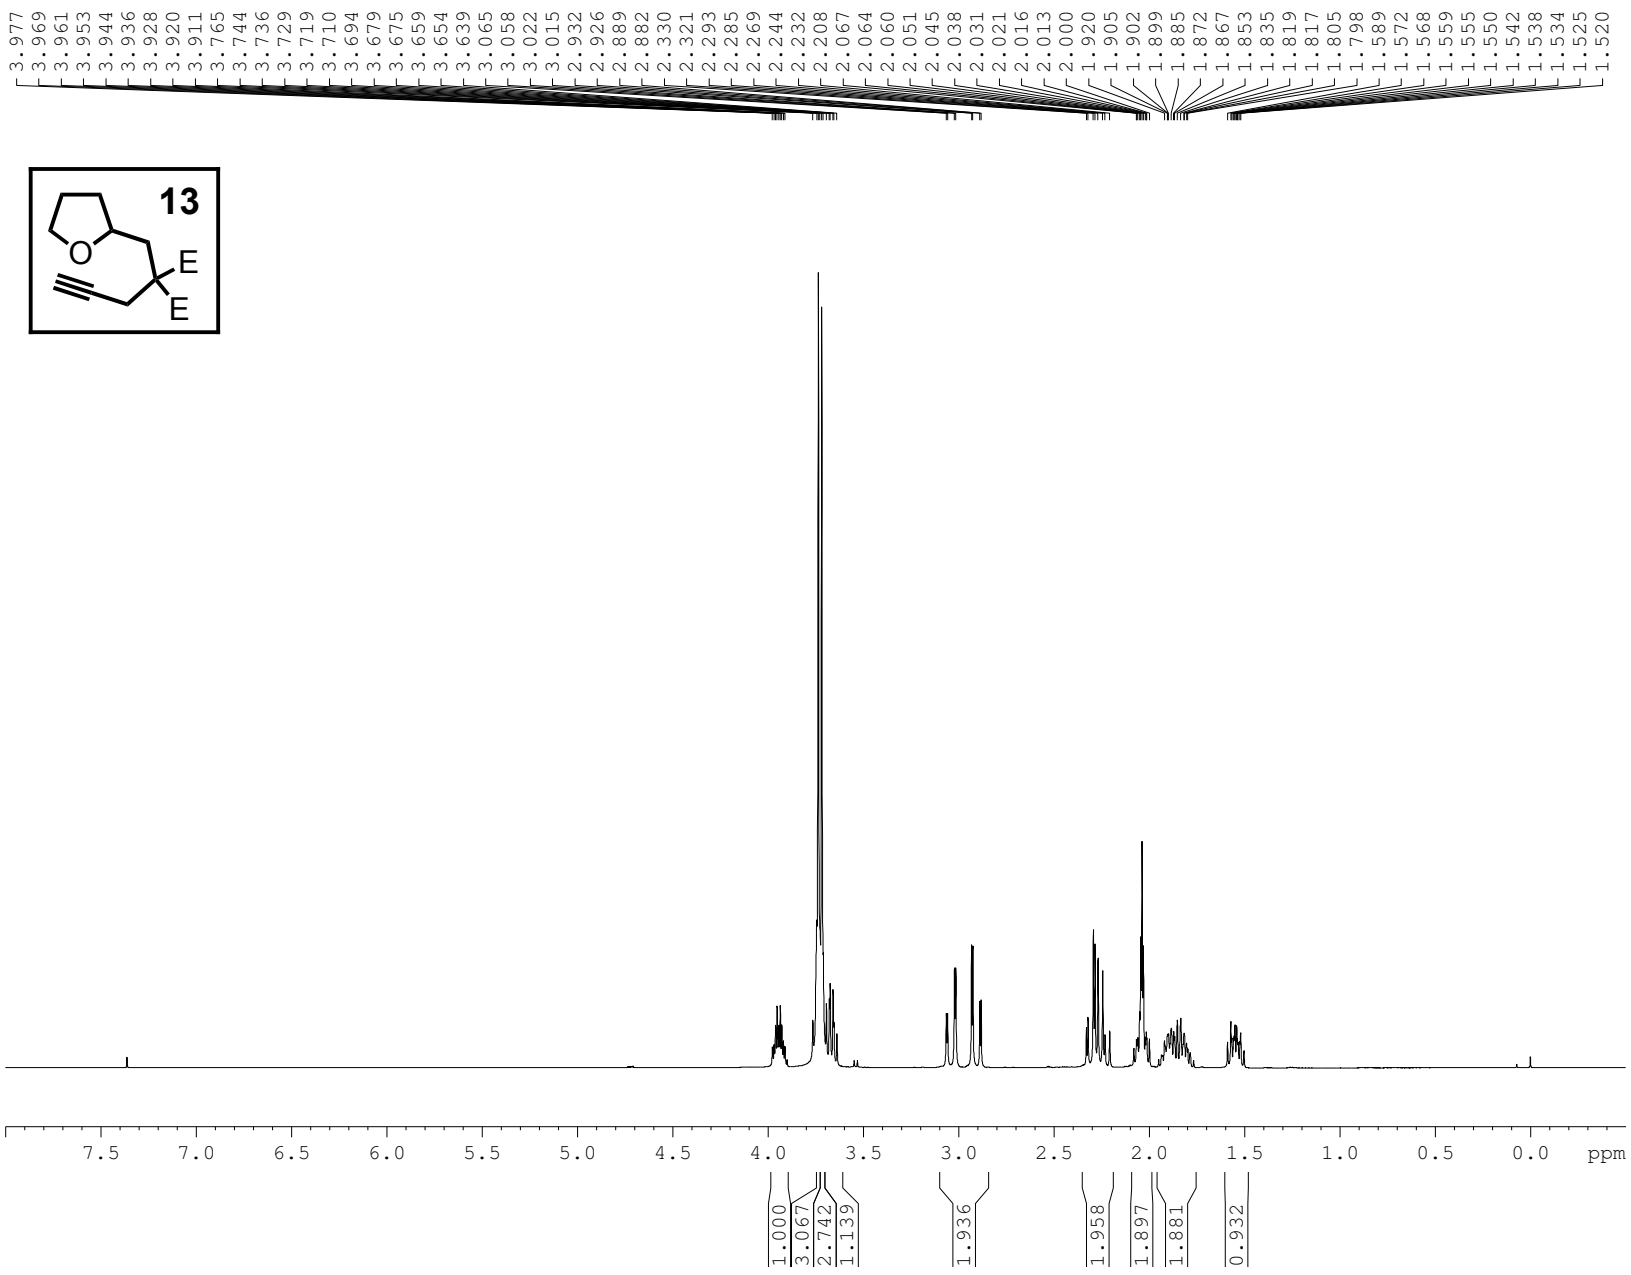

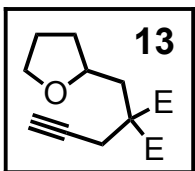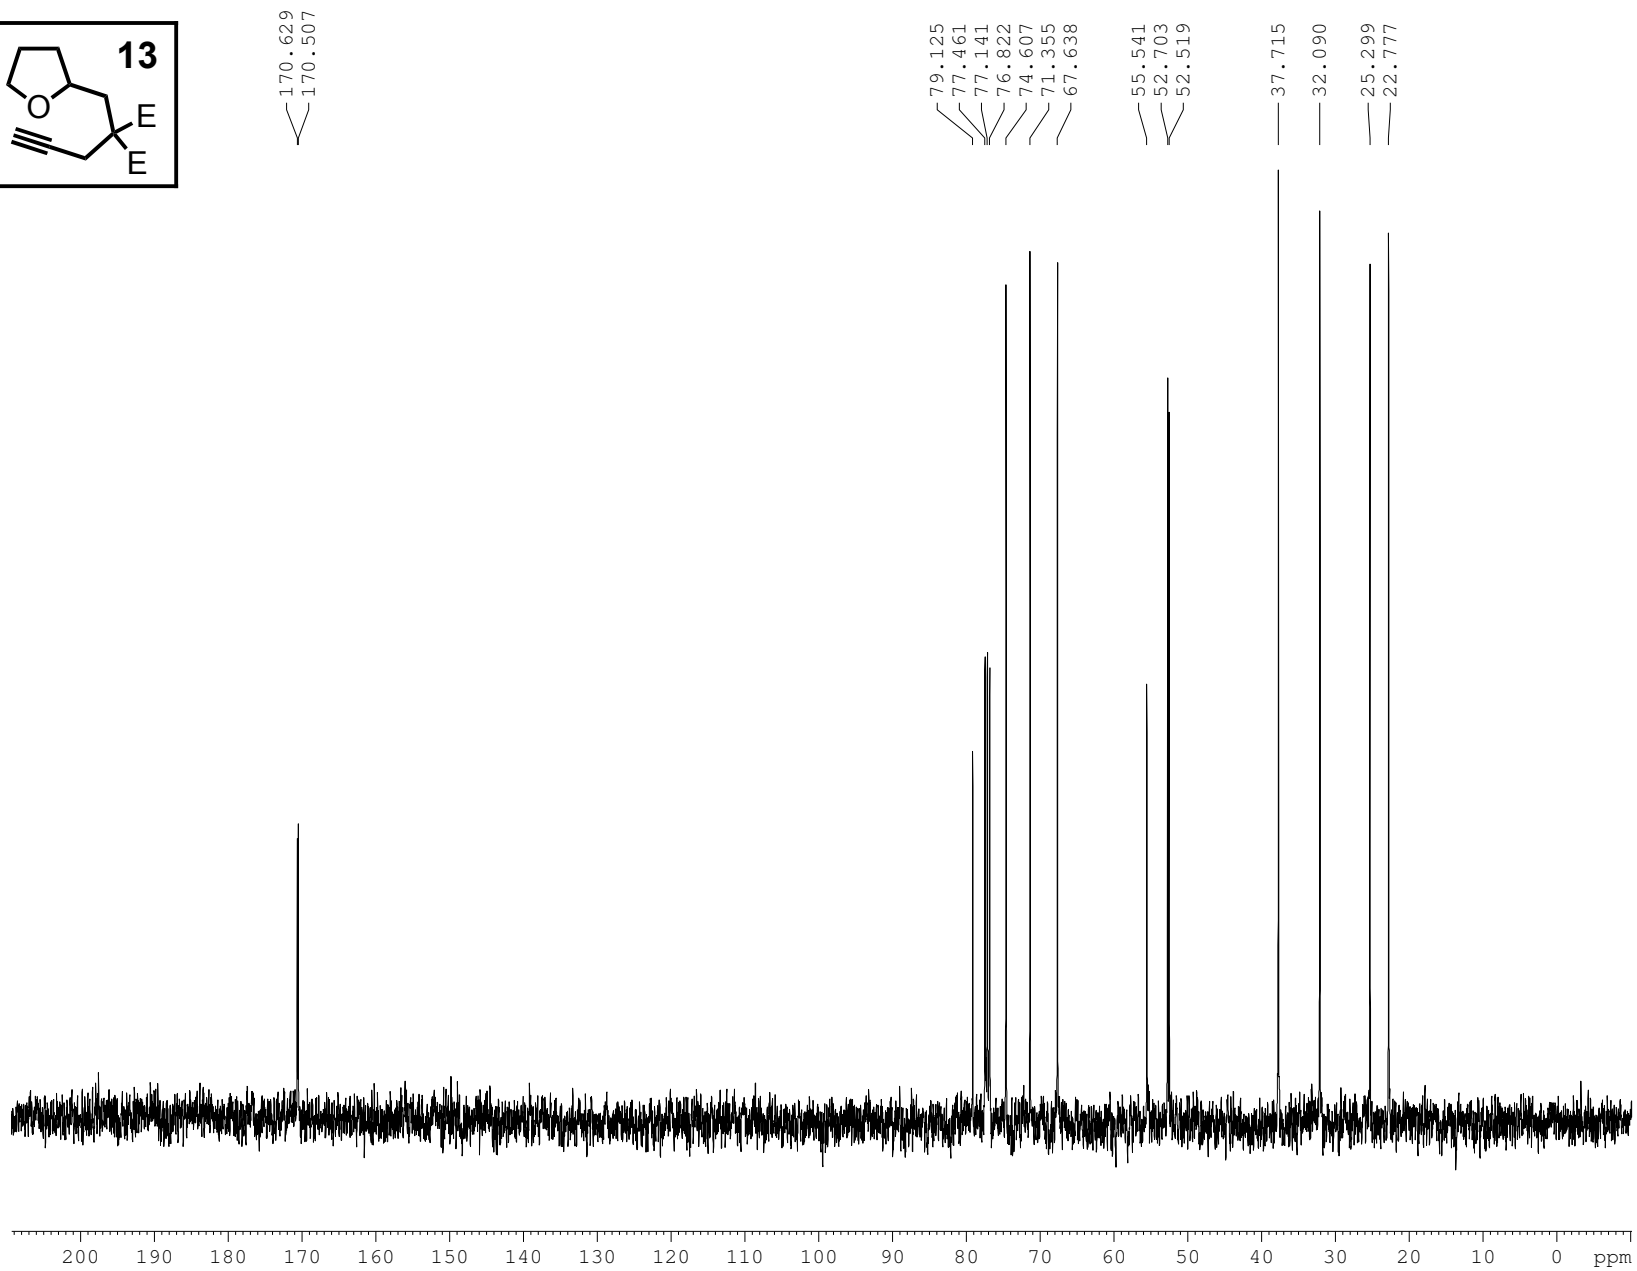

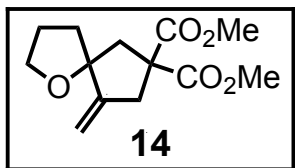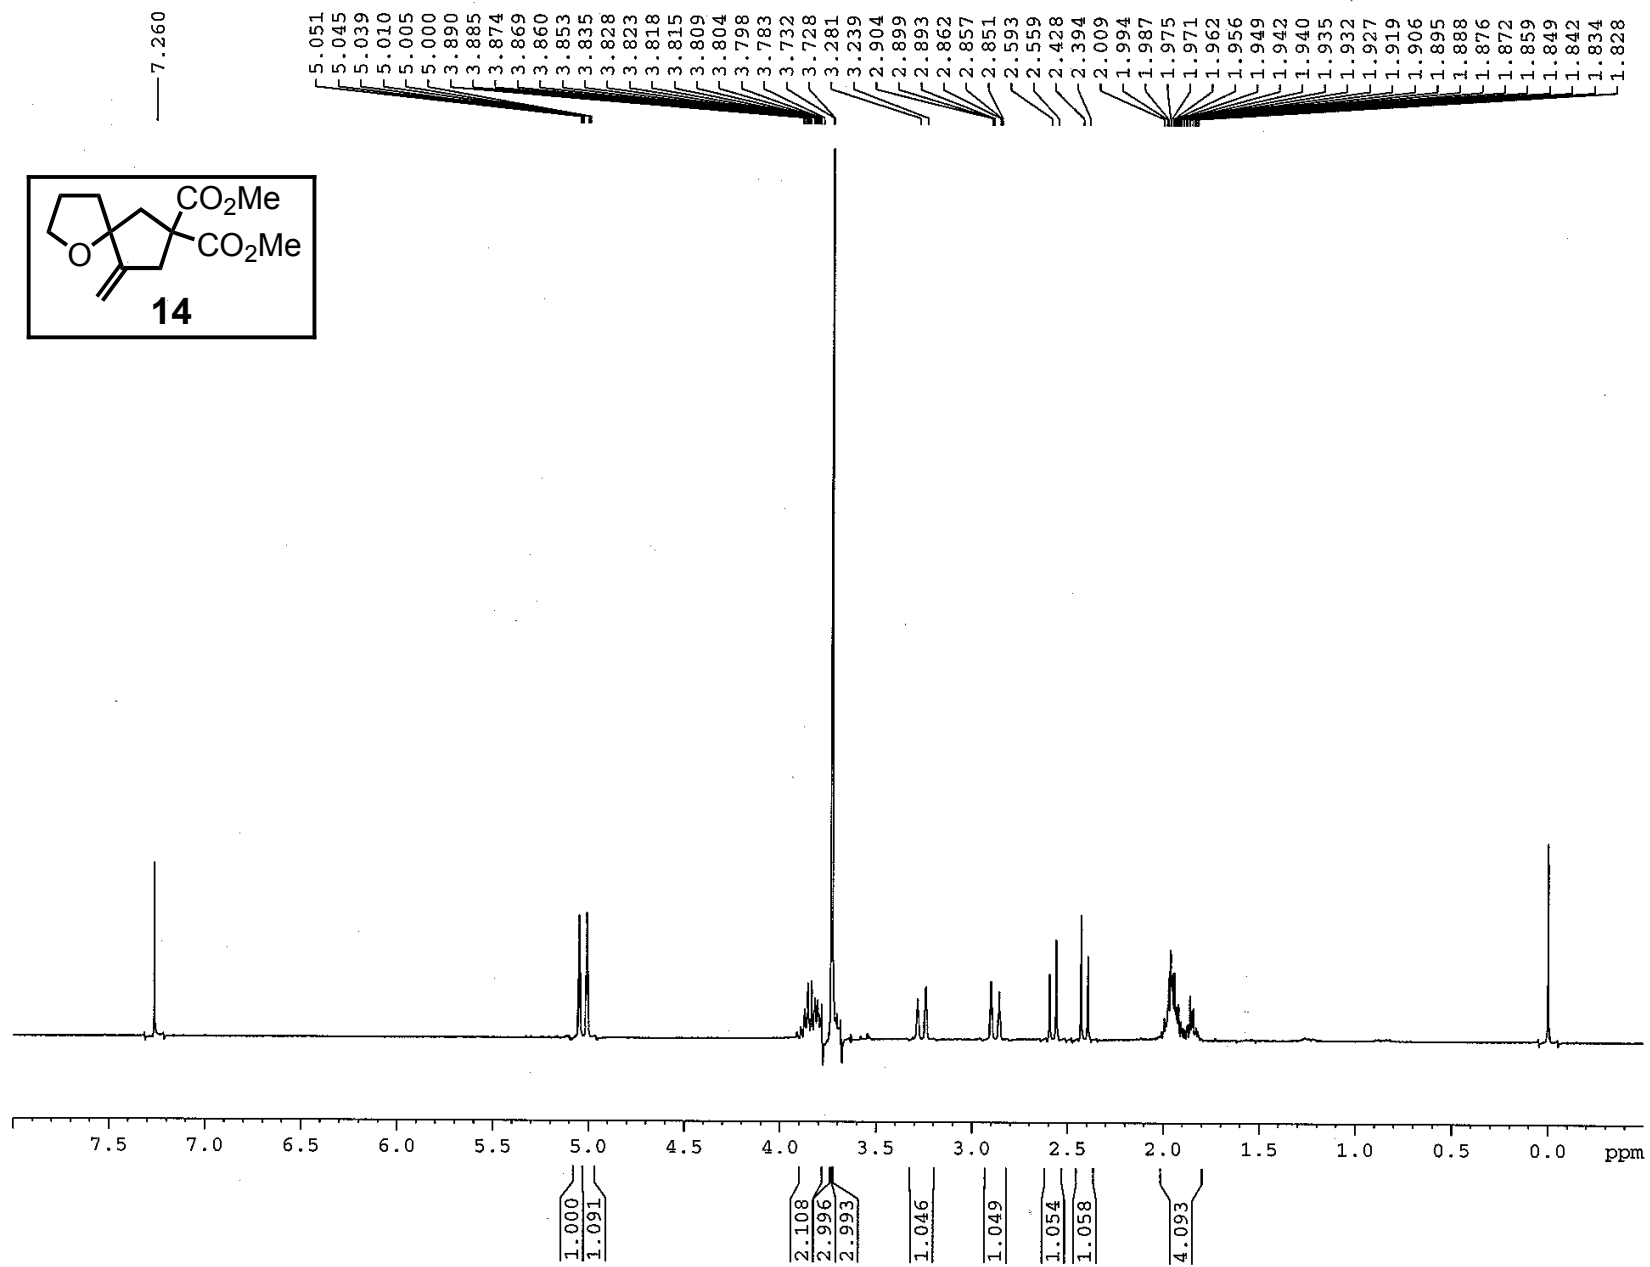

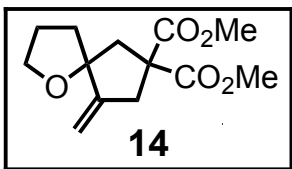

172.551  
171.912

151.803

107.615

88.247

67.568

56.747

53.010

45.867

39.170

35.591

26.053

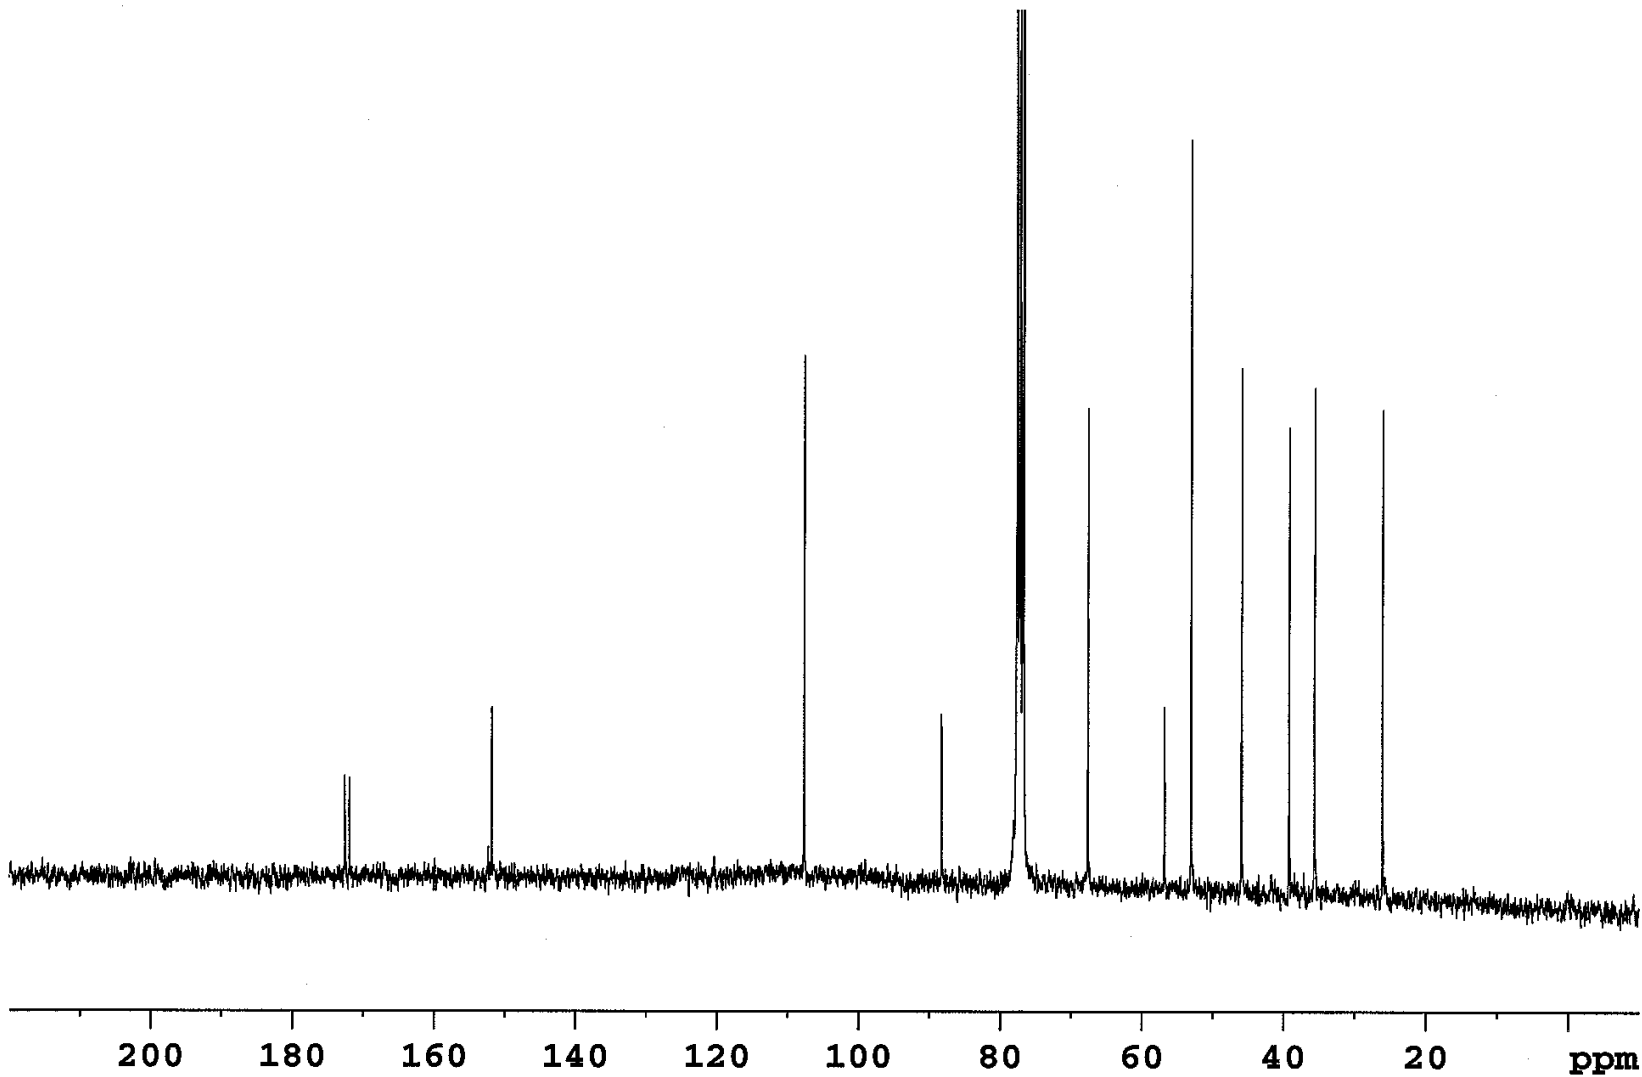



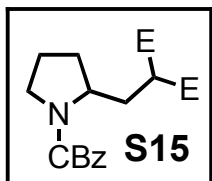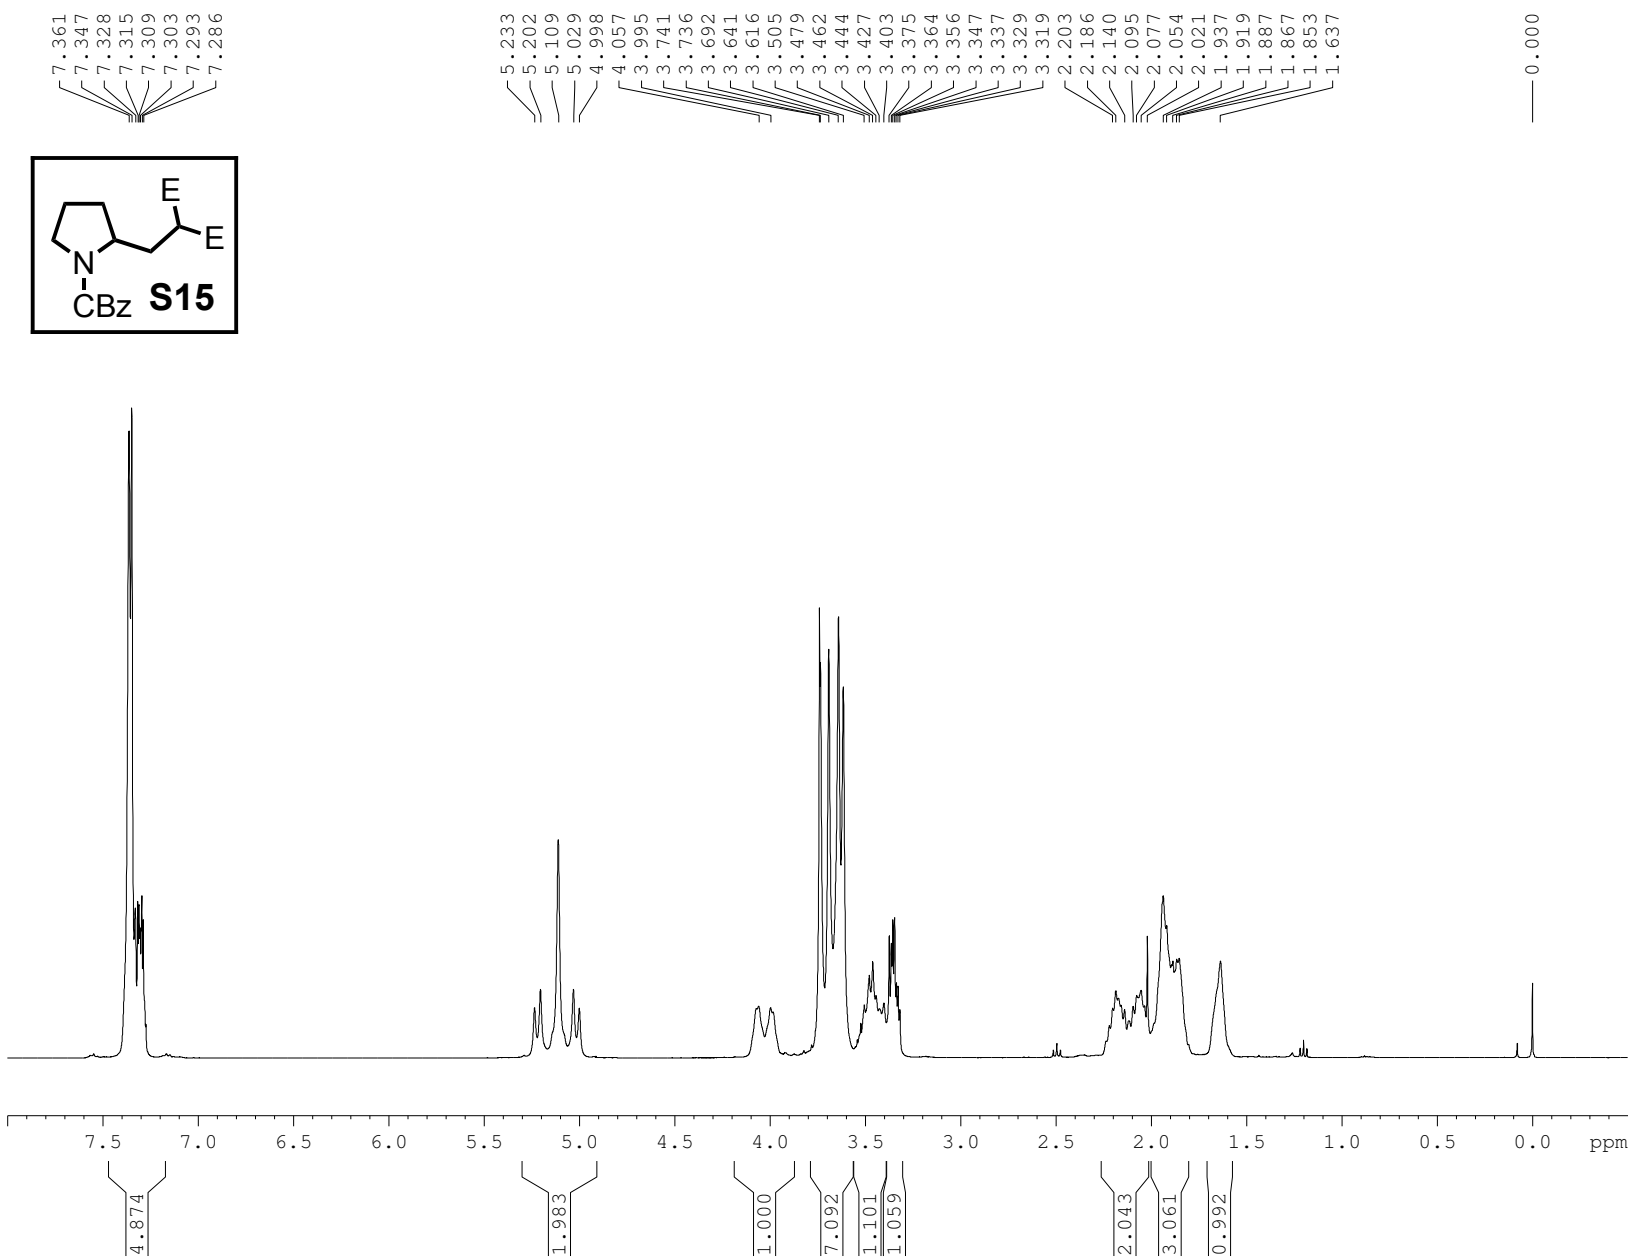

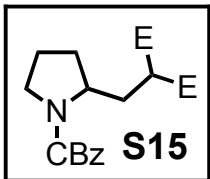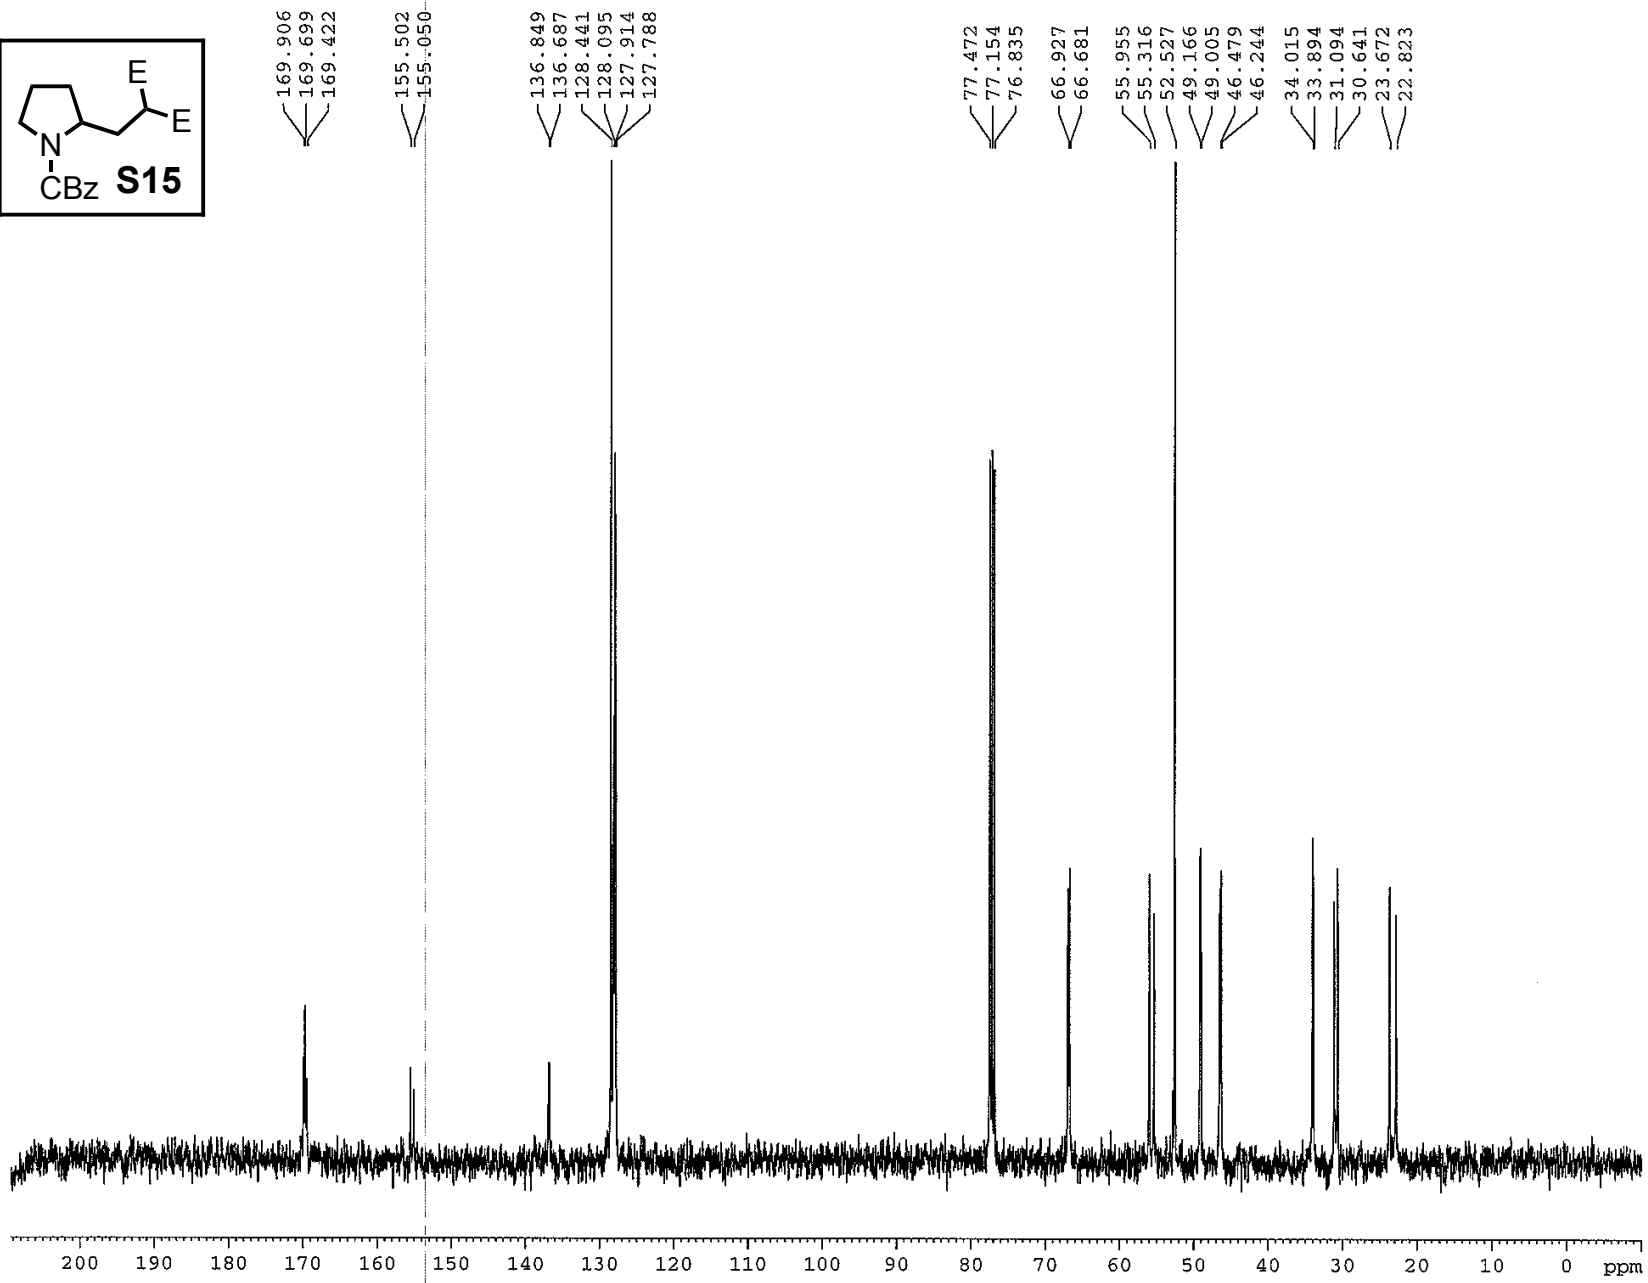

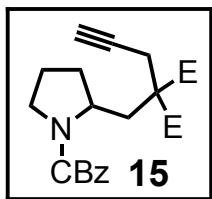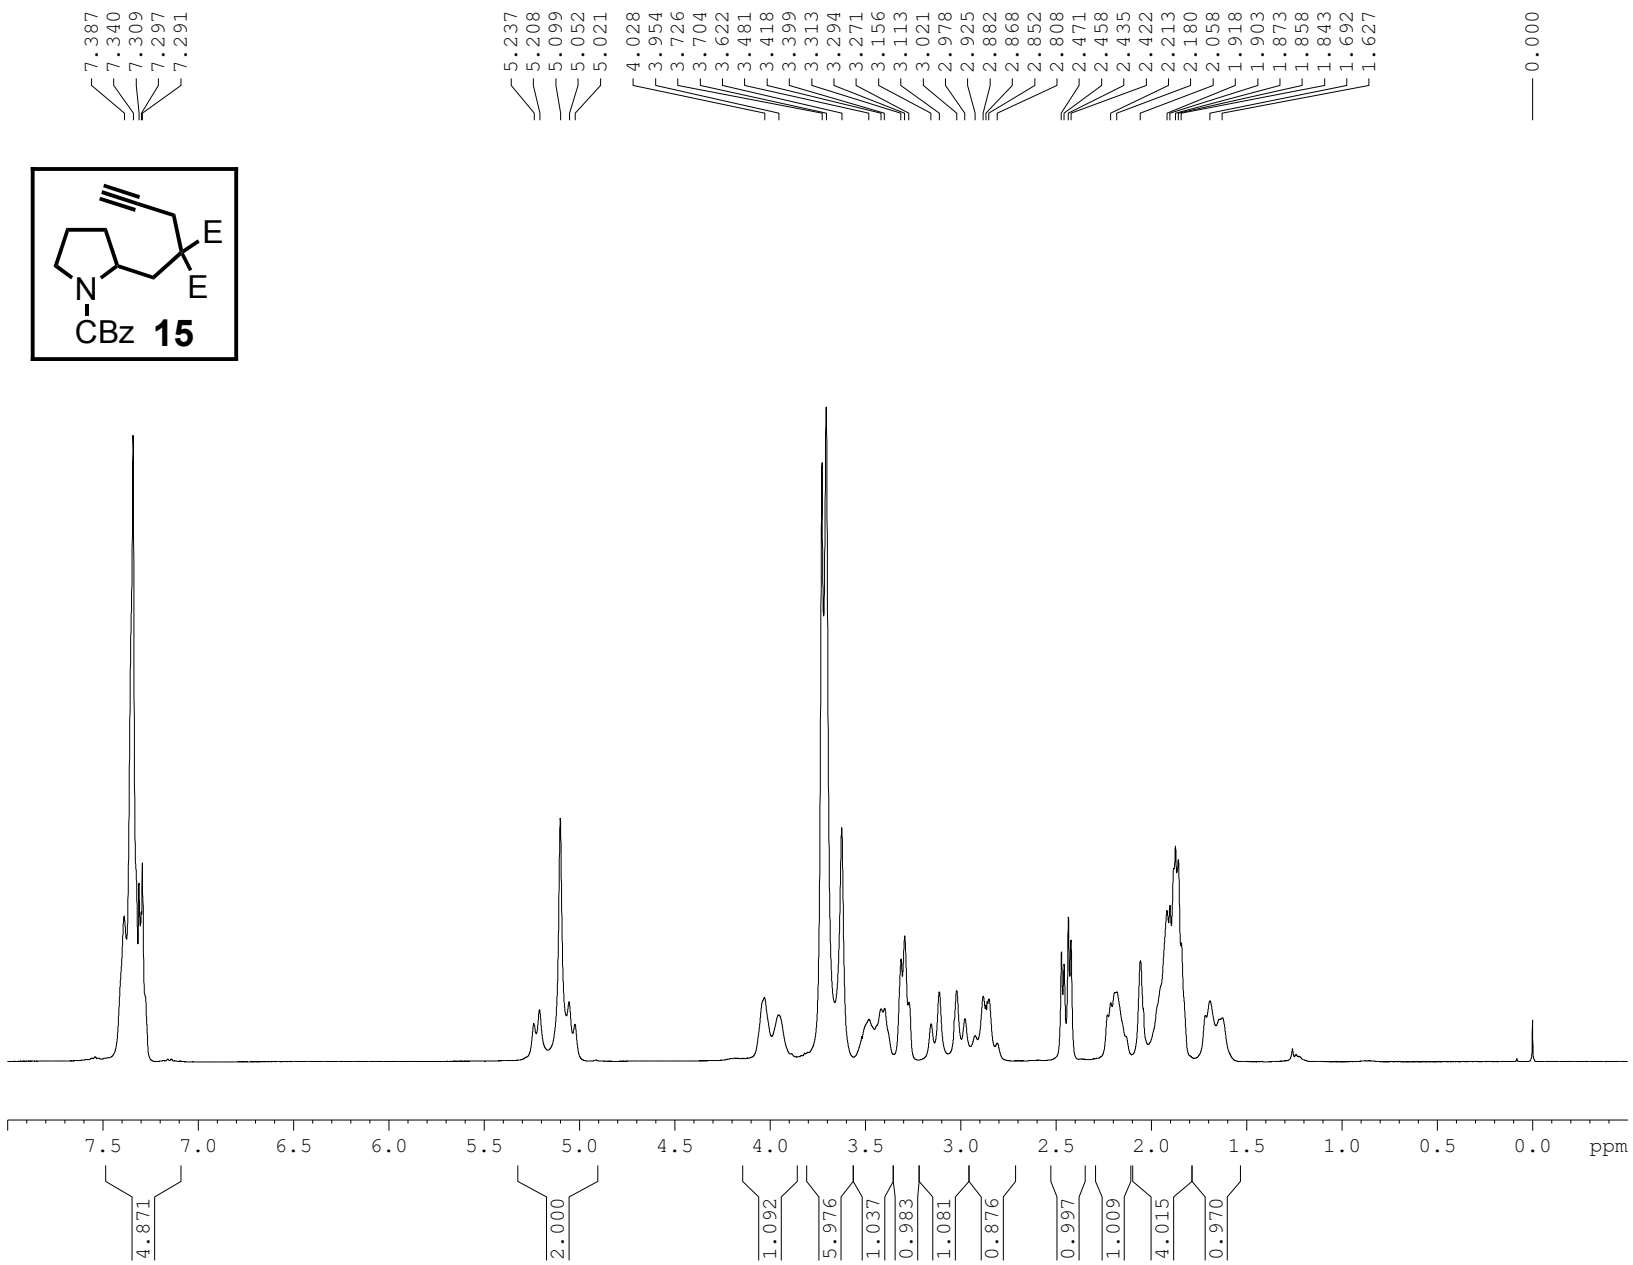

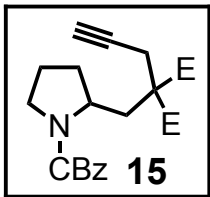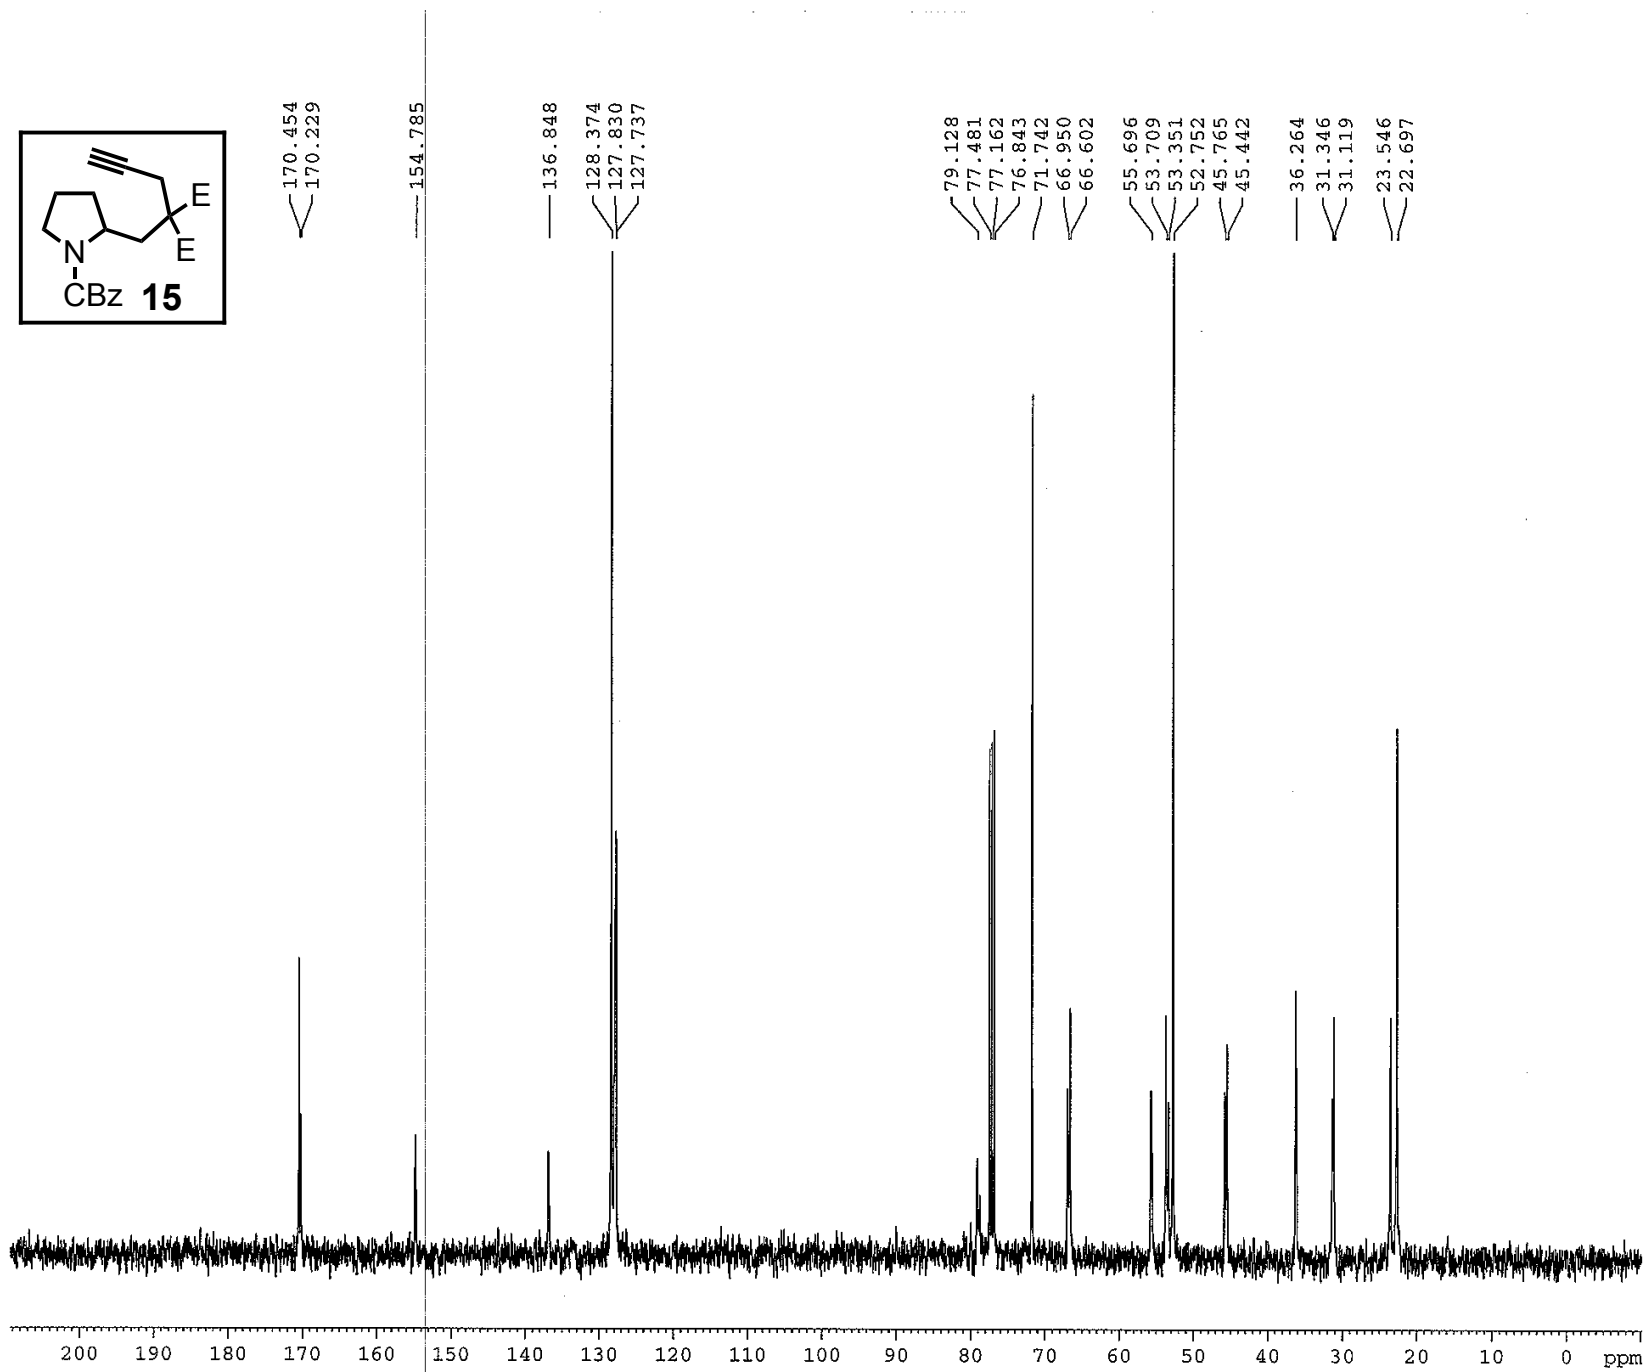

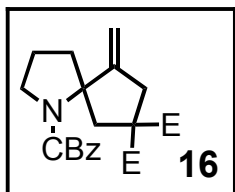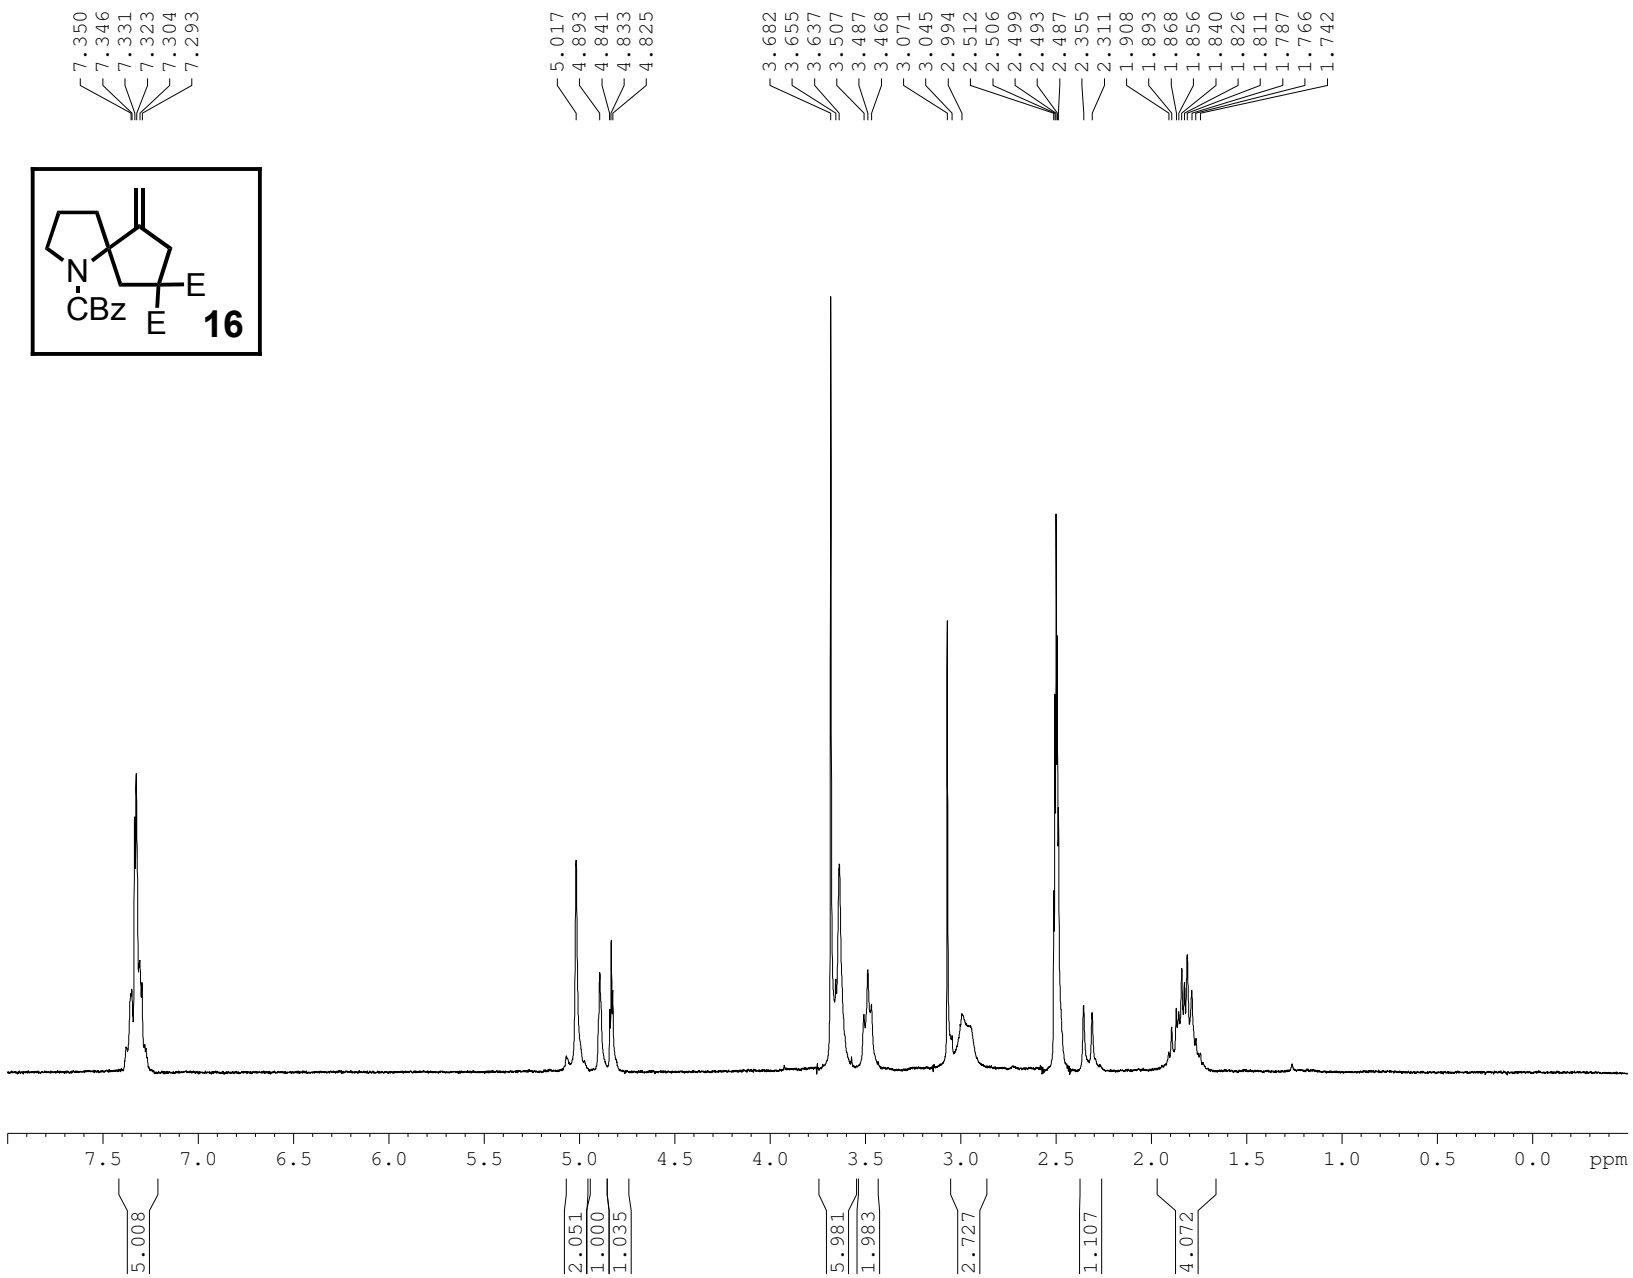

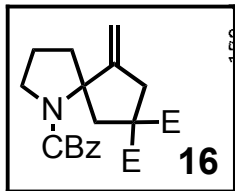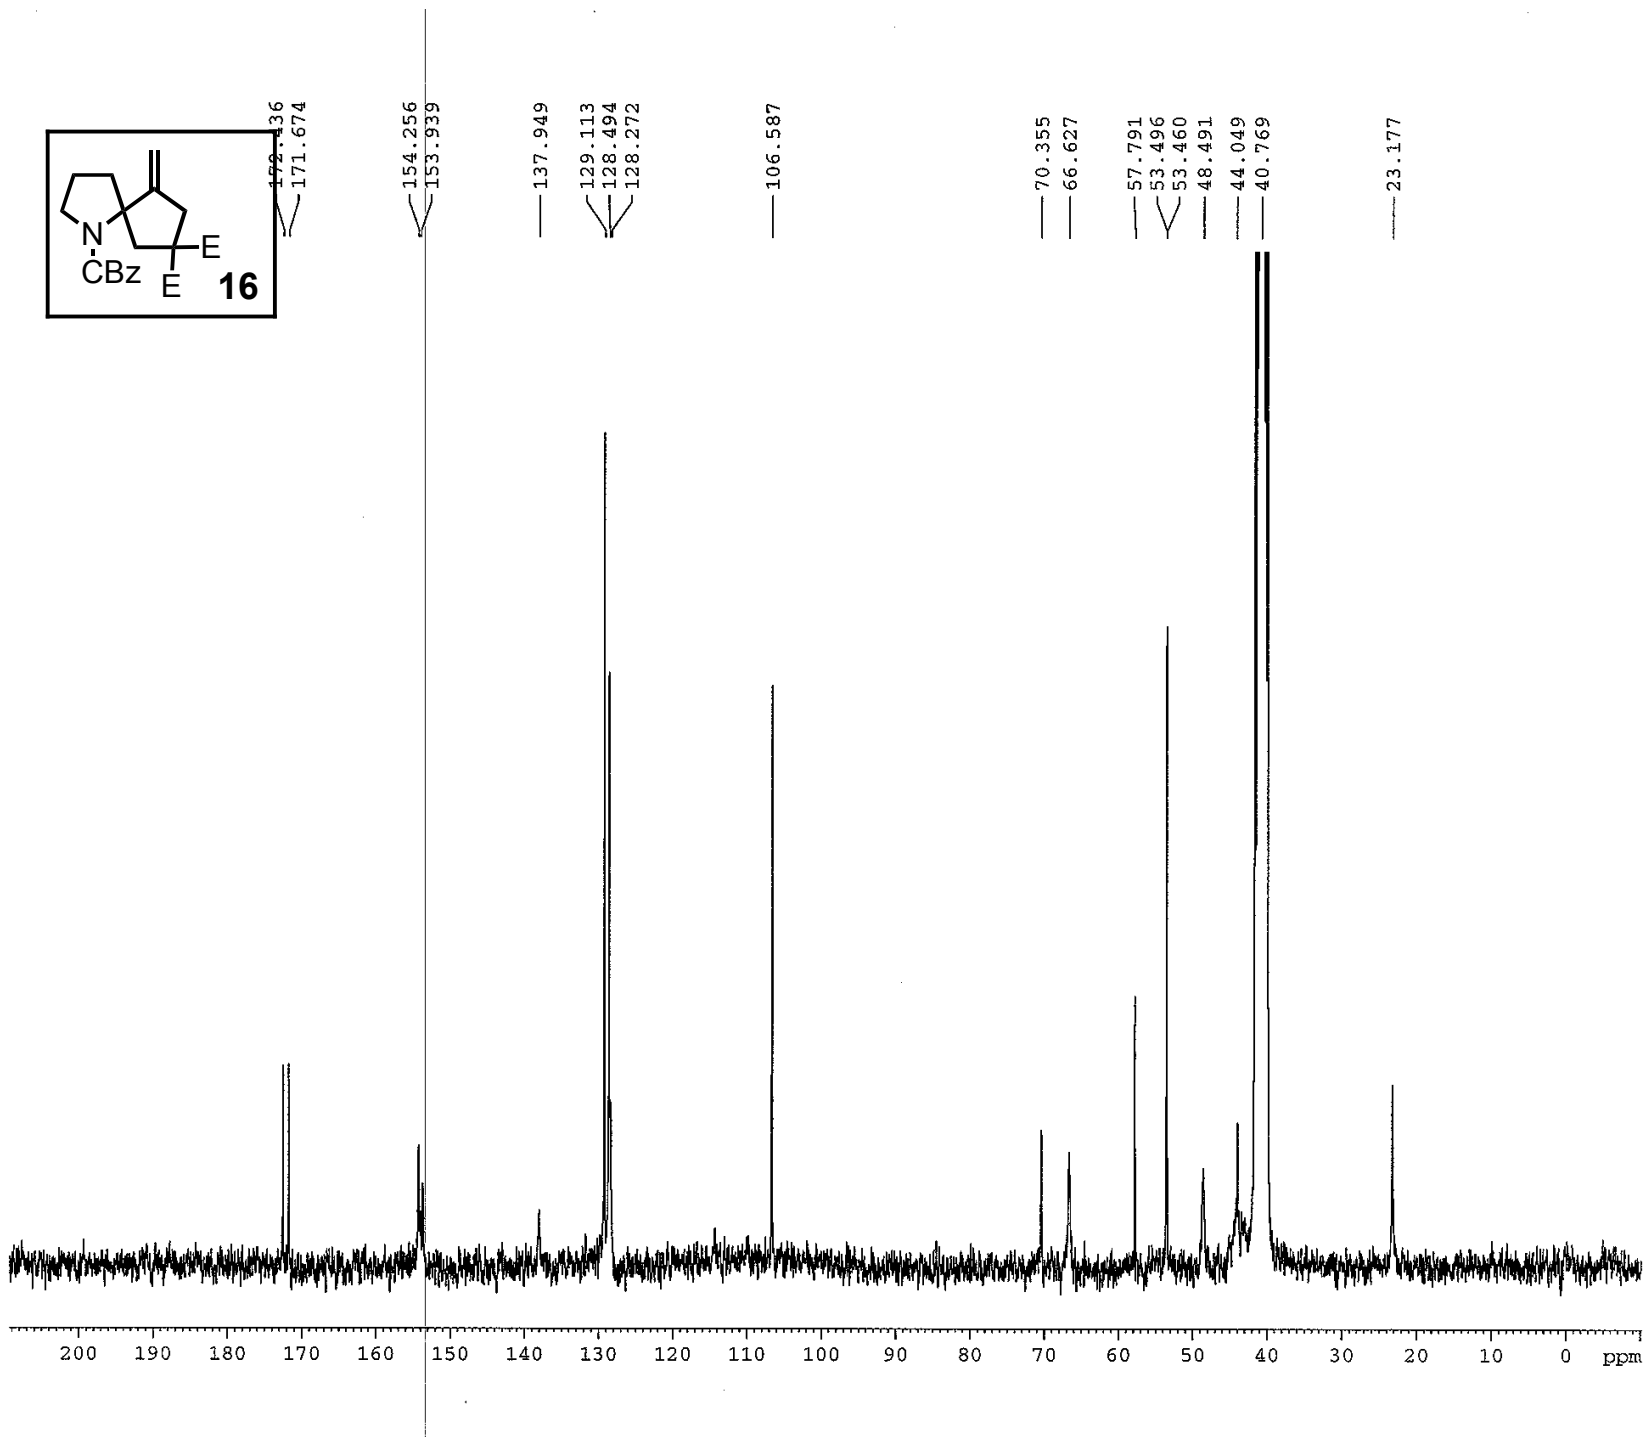

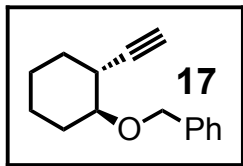

7.397  
7.378  
7.356  
7.340  
7.338  
7.320  
7.301  
7.269  
7.252  
7.233  
7.225

4.646

3.416  
3.407  
3.395  
3.387  
3.375  
3.366  
2.527  
2.524  
2.504  
2.485  
2.099  
2.093  
2.032  
2.022  
2.018  
2.009  
2.002  
1.994  
1.985  
1.721  
1.702  
1.693  
1.682  
1.674  
1.652  
1.643  
1.636  
1.625  
1.500  
1.476  
1.467  
1.451  
1.442  
1.418  
1.409  
1.402  
1.378  
1.354  
1.322  
1.288  
1.267

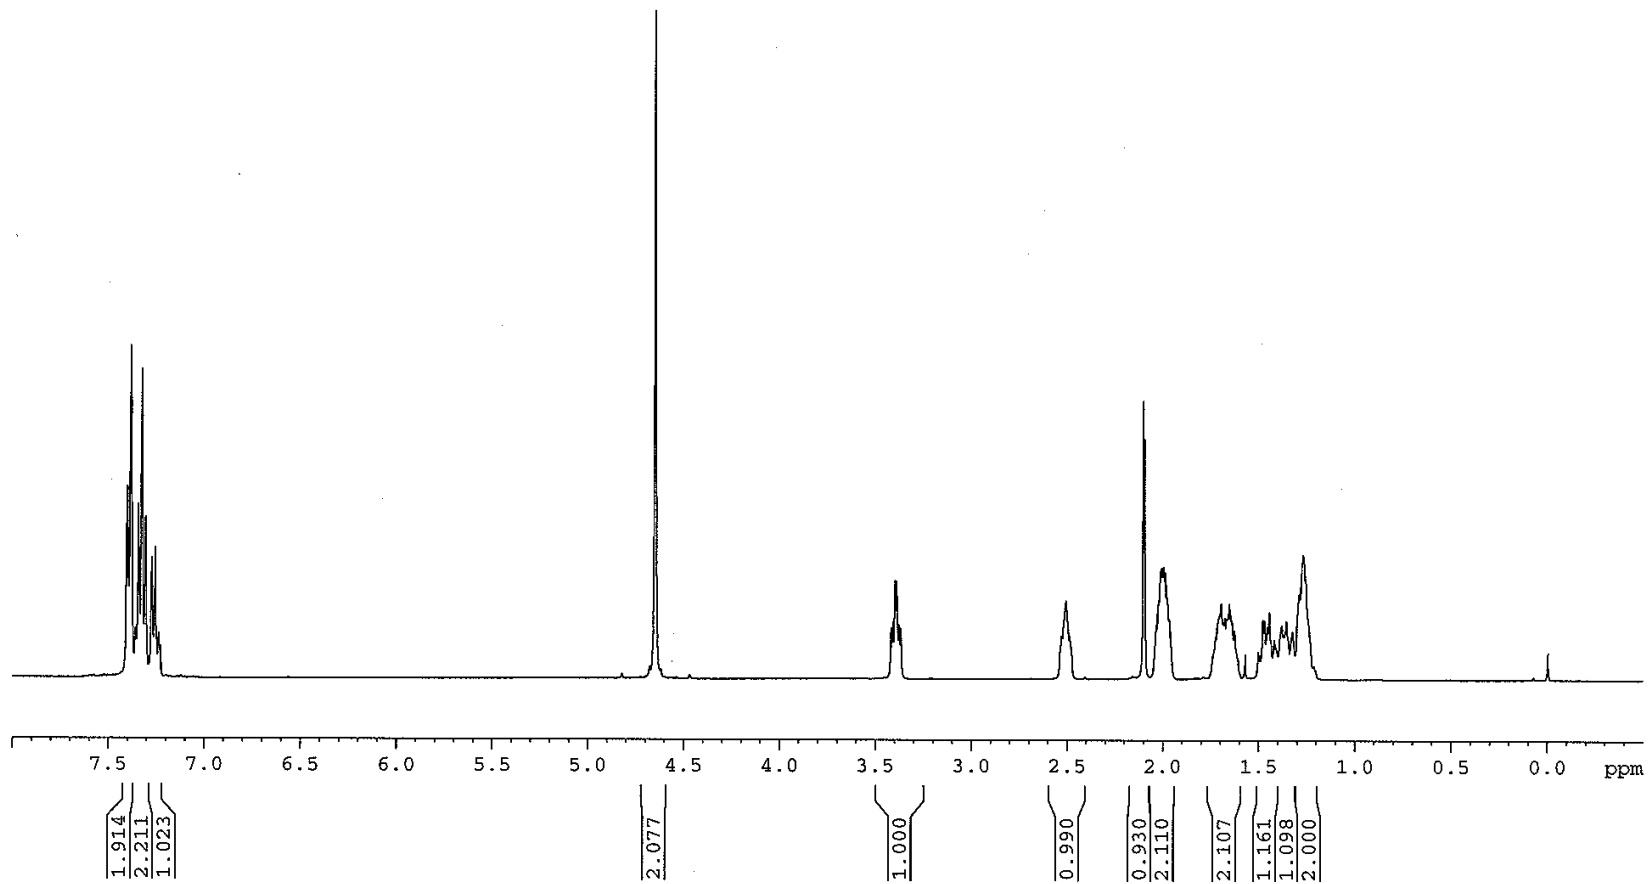

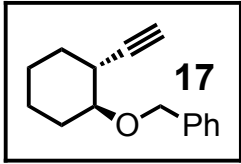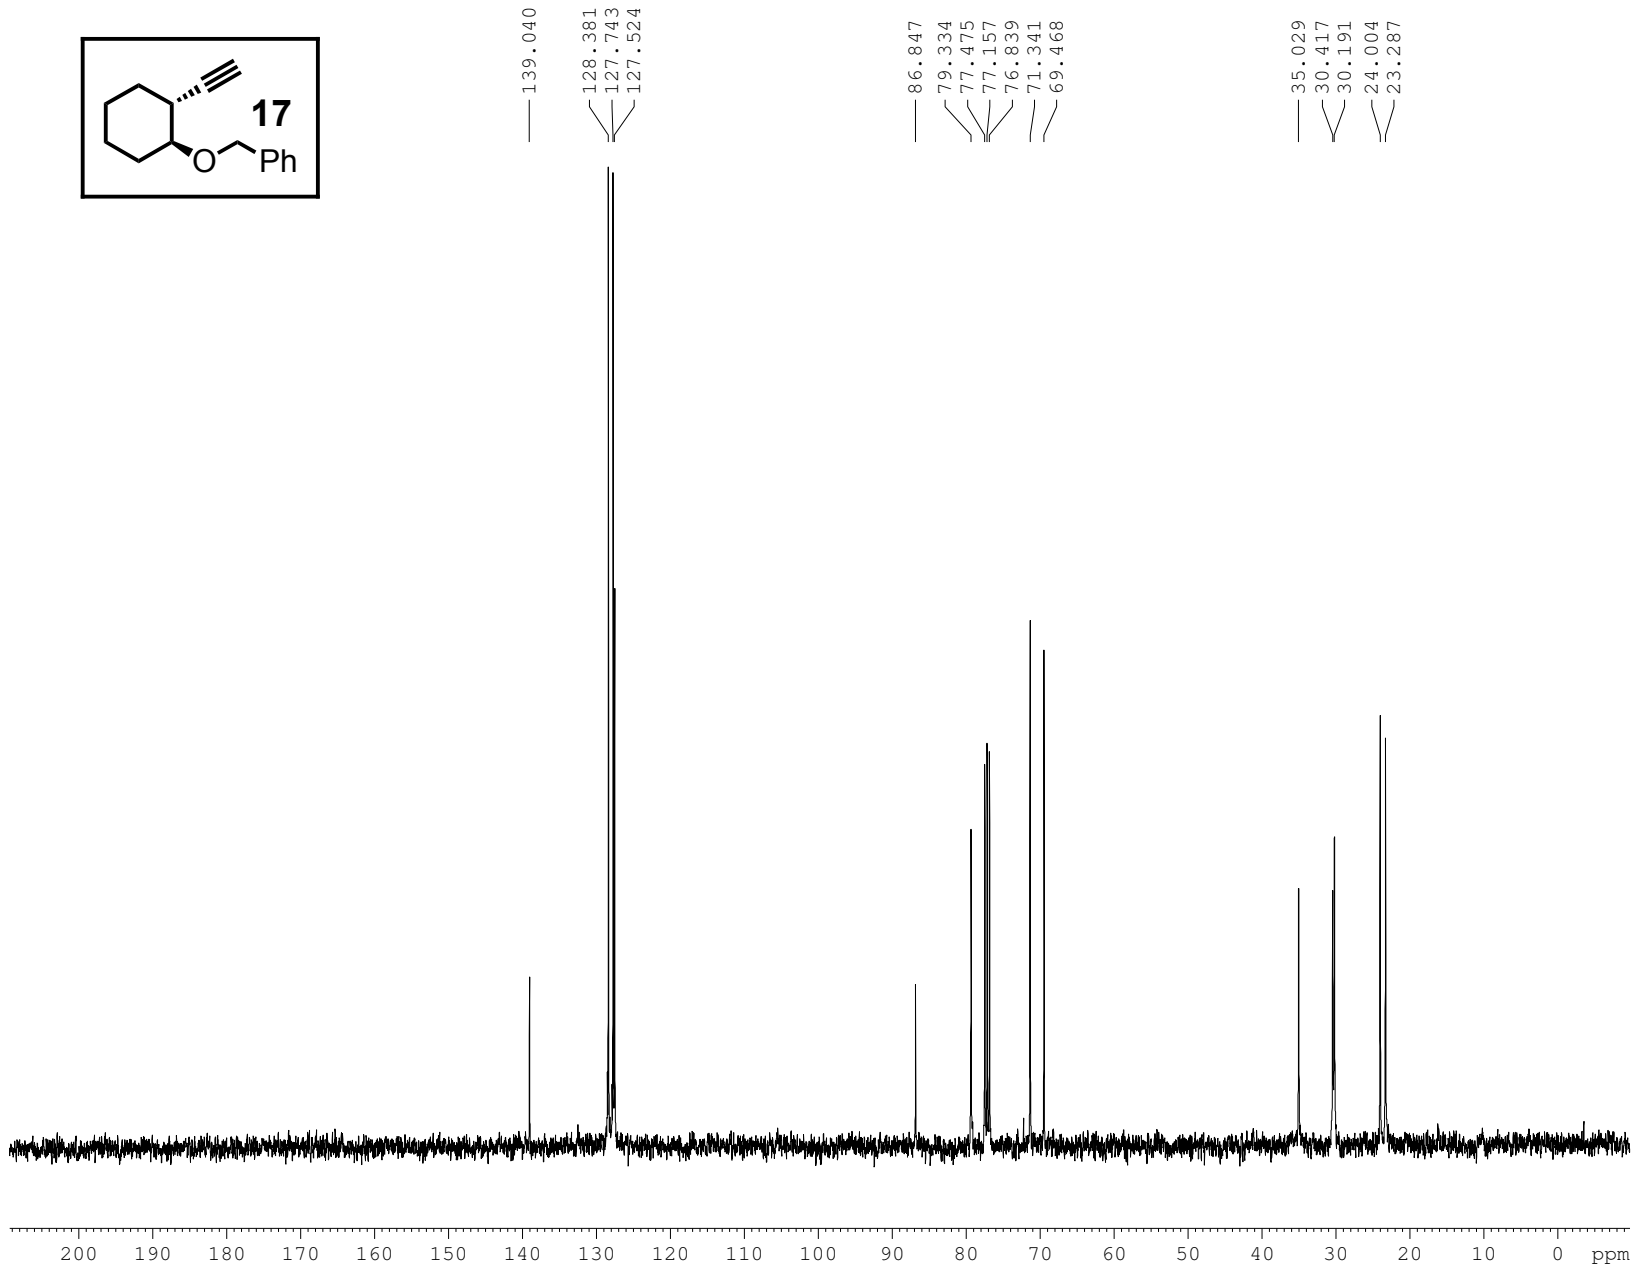



7.382  
7.367  
7.362  
7.355  
7.333  
7.327  
7.313  
7.307  
7.295  
7.289  
7.282  
7.277  
7.257

5.278  
5.271  
4.852  
4.844  
4.834  
4.824  
4.817  
3.308  
3.296  
3.272  
3.260  
3.236  
3.224  
2.254  
2.245  
2.216  
2.207  
2.196  
2.148  
2.139  
2.131  
2.122  
2.095  
2.075  
2.065  
2.051  
1.929  
1.914  
1.894  
1.834  
1.824  
1.813  
1.803  
1.635  
1.623  
1.597  
1.584  
1.550  
1.518  
1.506  
1.400  
1.358  
1.325  
1.292  
1.285  
1.252  
1.221  
1.210  
1.181

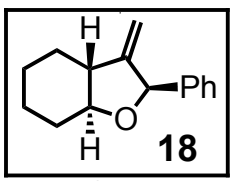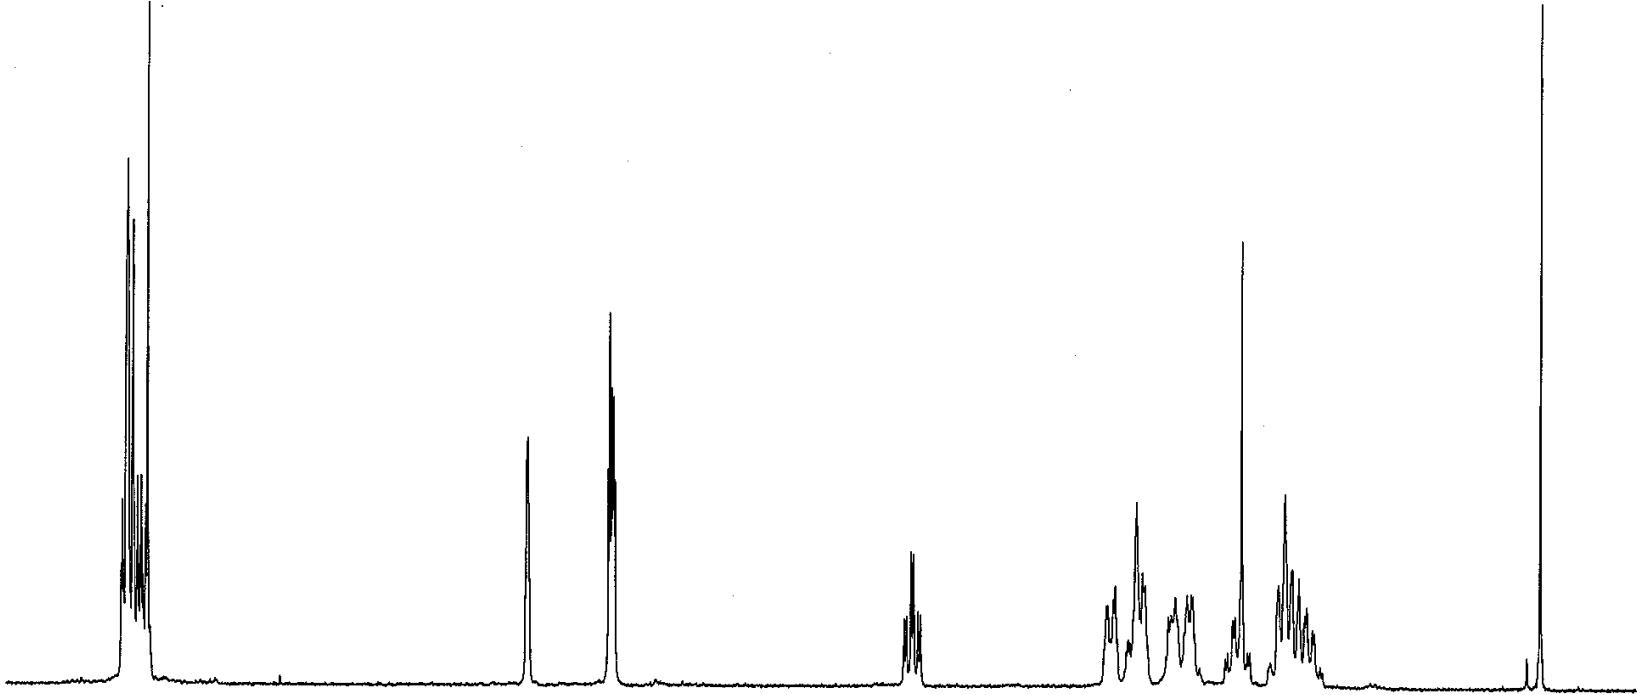

7.5 7.0 6.5 6.0 5.5 5.0 4.5 4.0 3.5 3.0 2.5 2.0 1.5 1.0 0.5 0.0 ppm

4.973

0.978

1.956

1.000

1.077

2.039

1.029

1.090

1.522

3.170

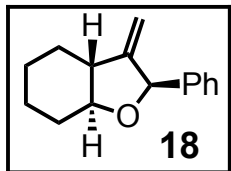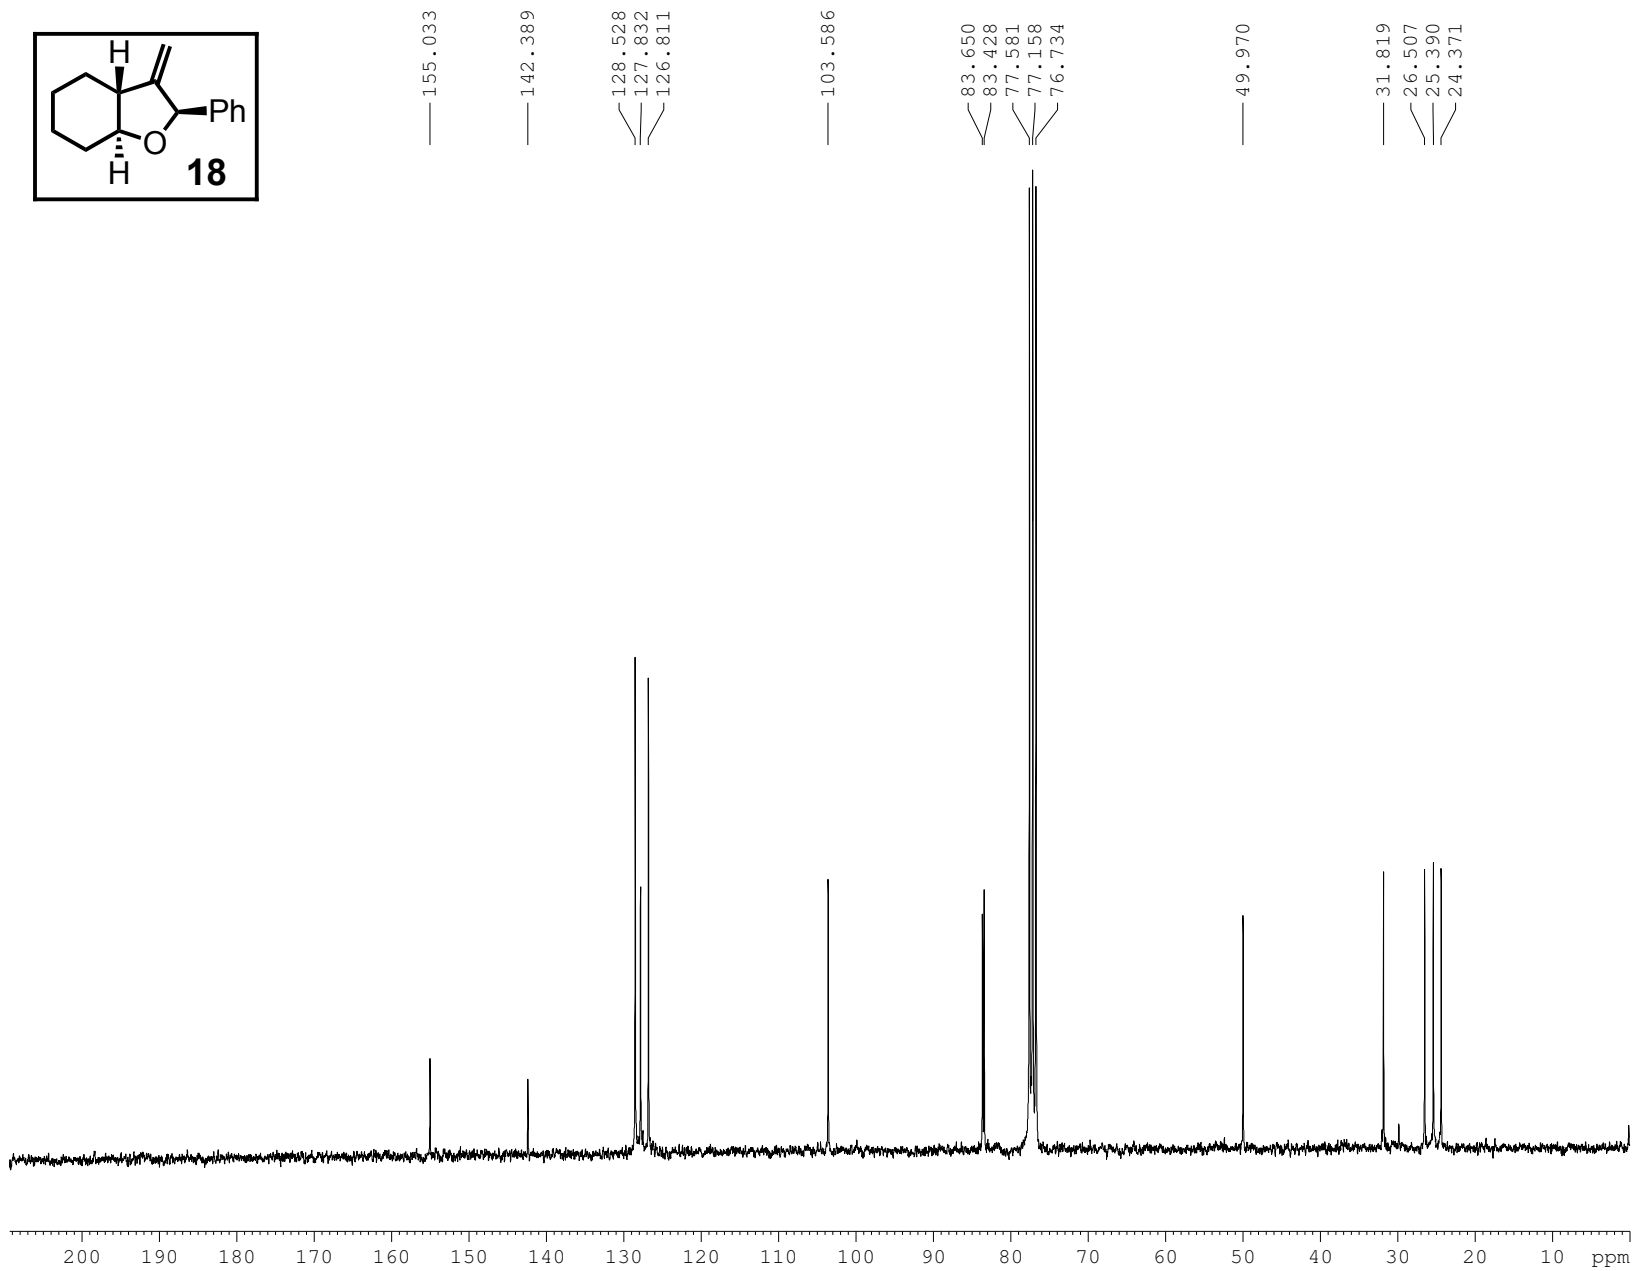

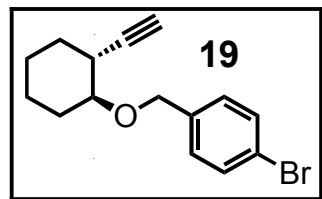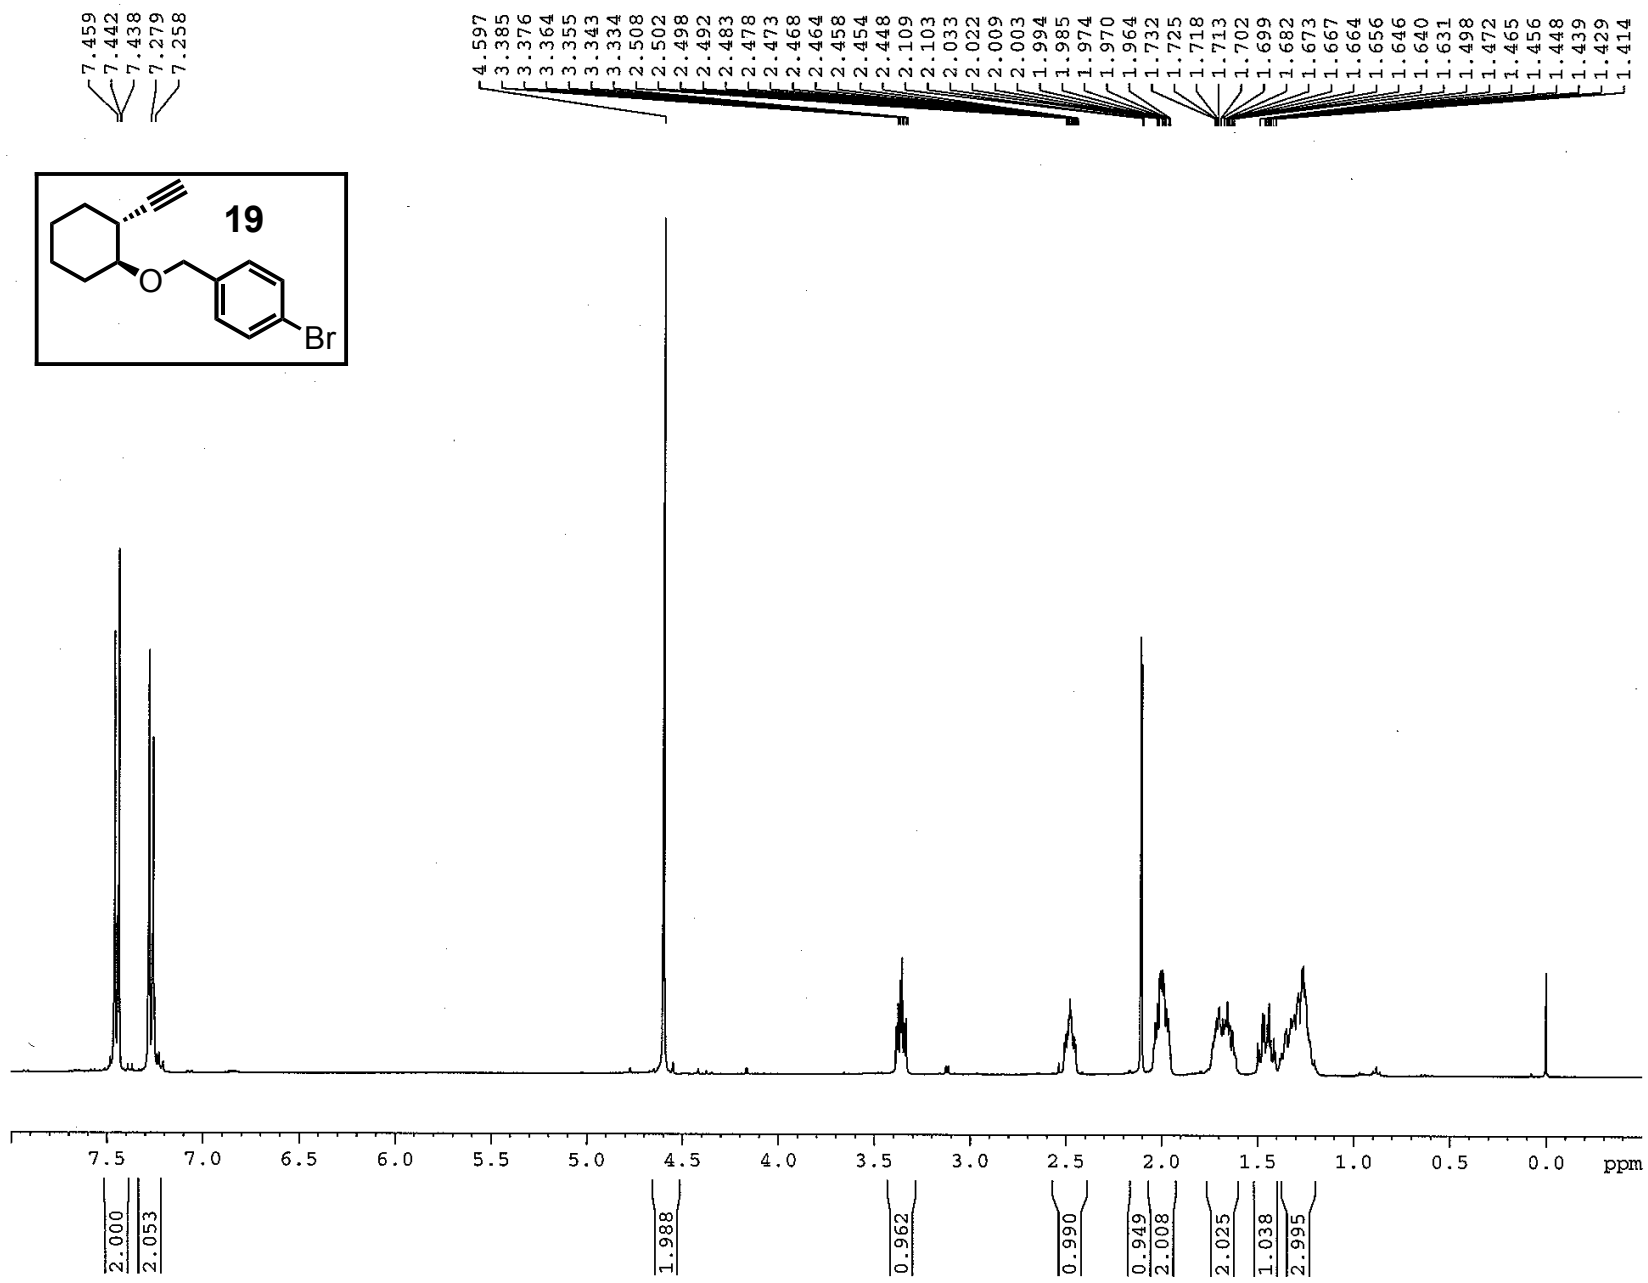

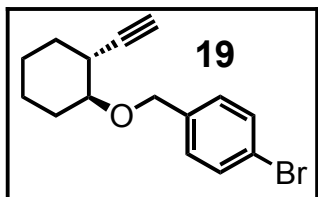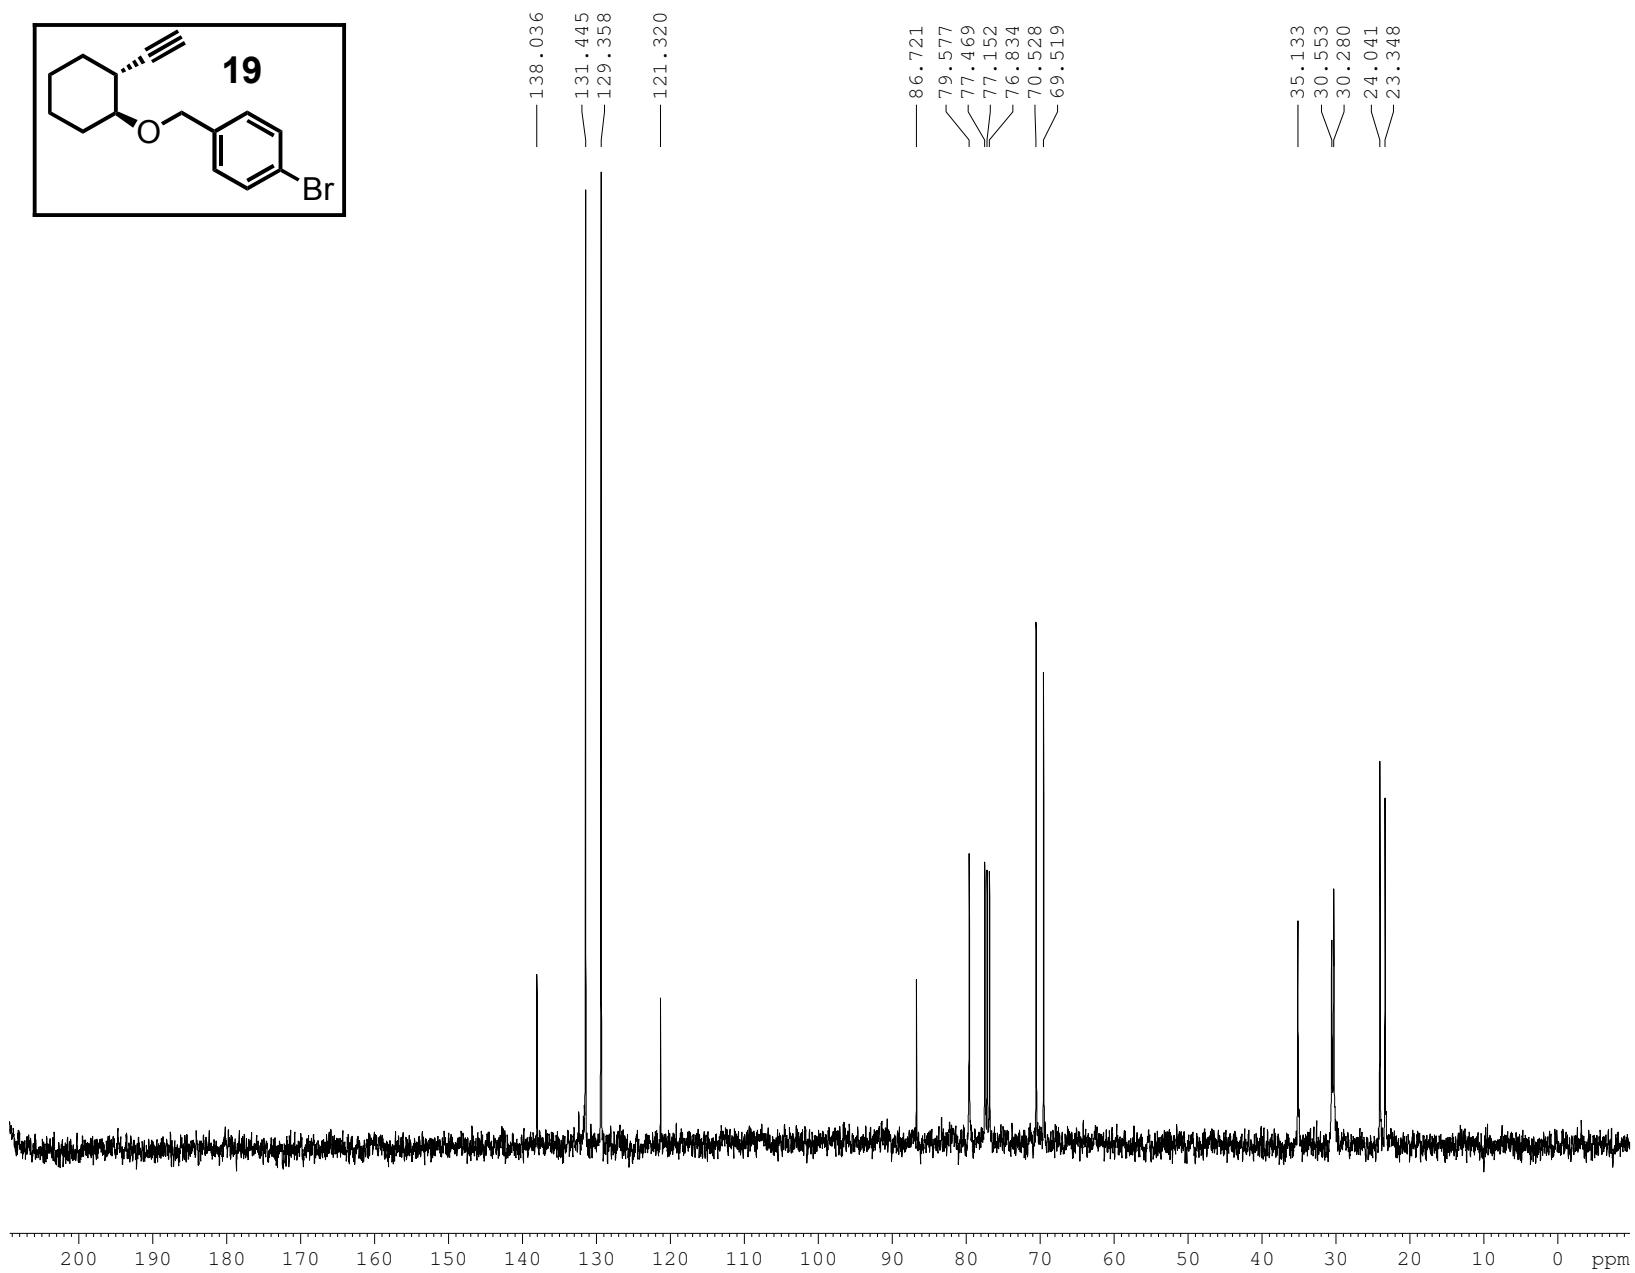

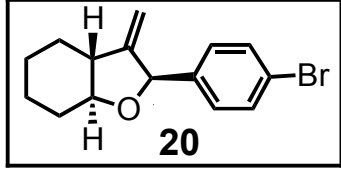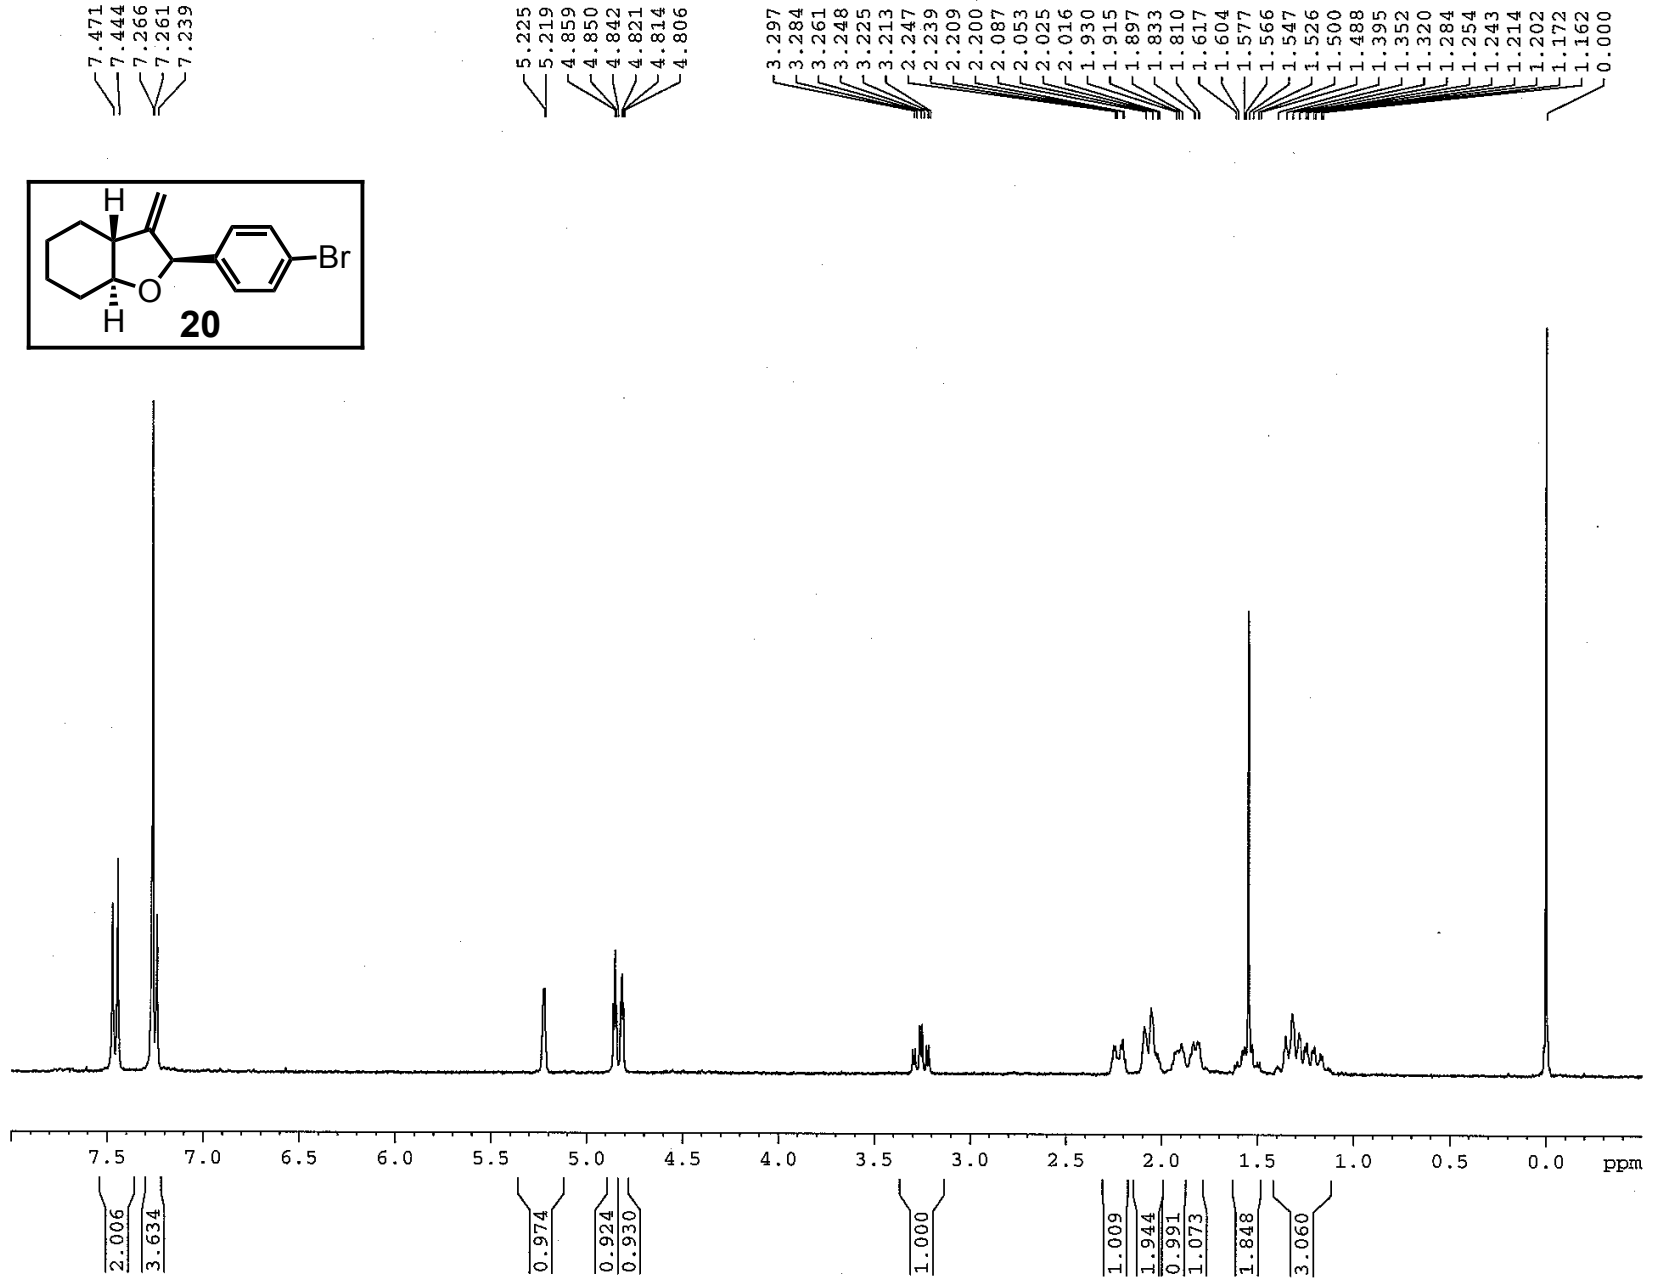

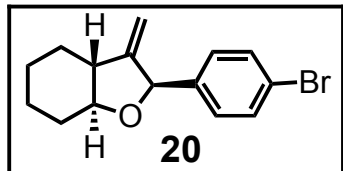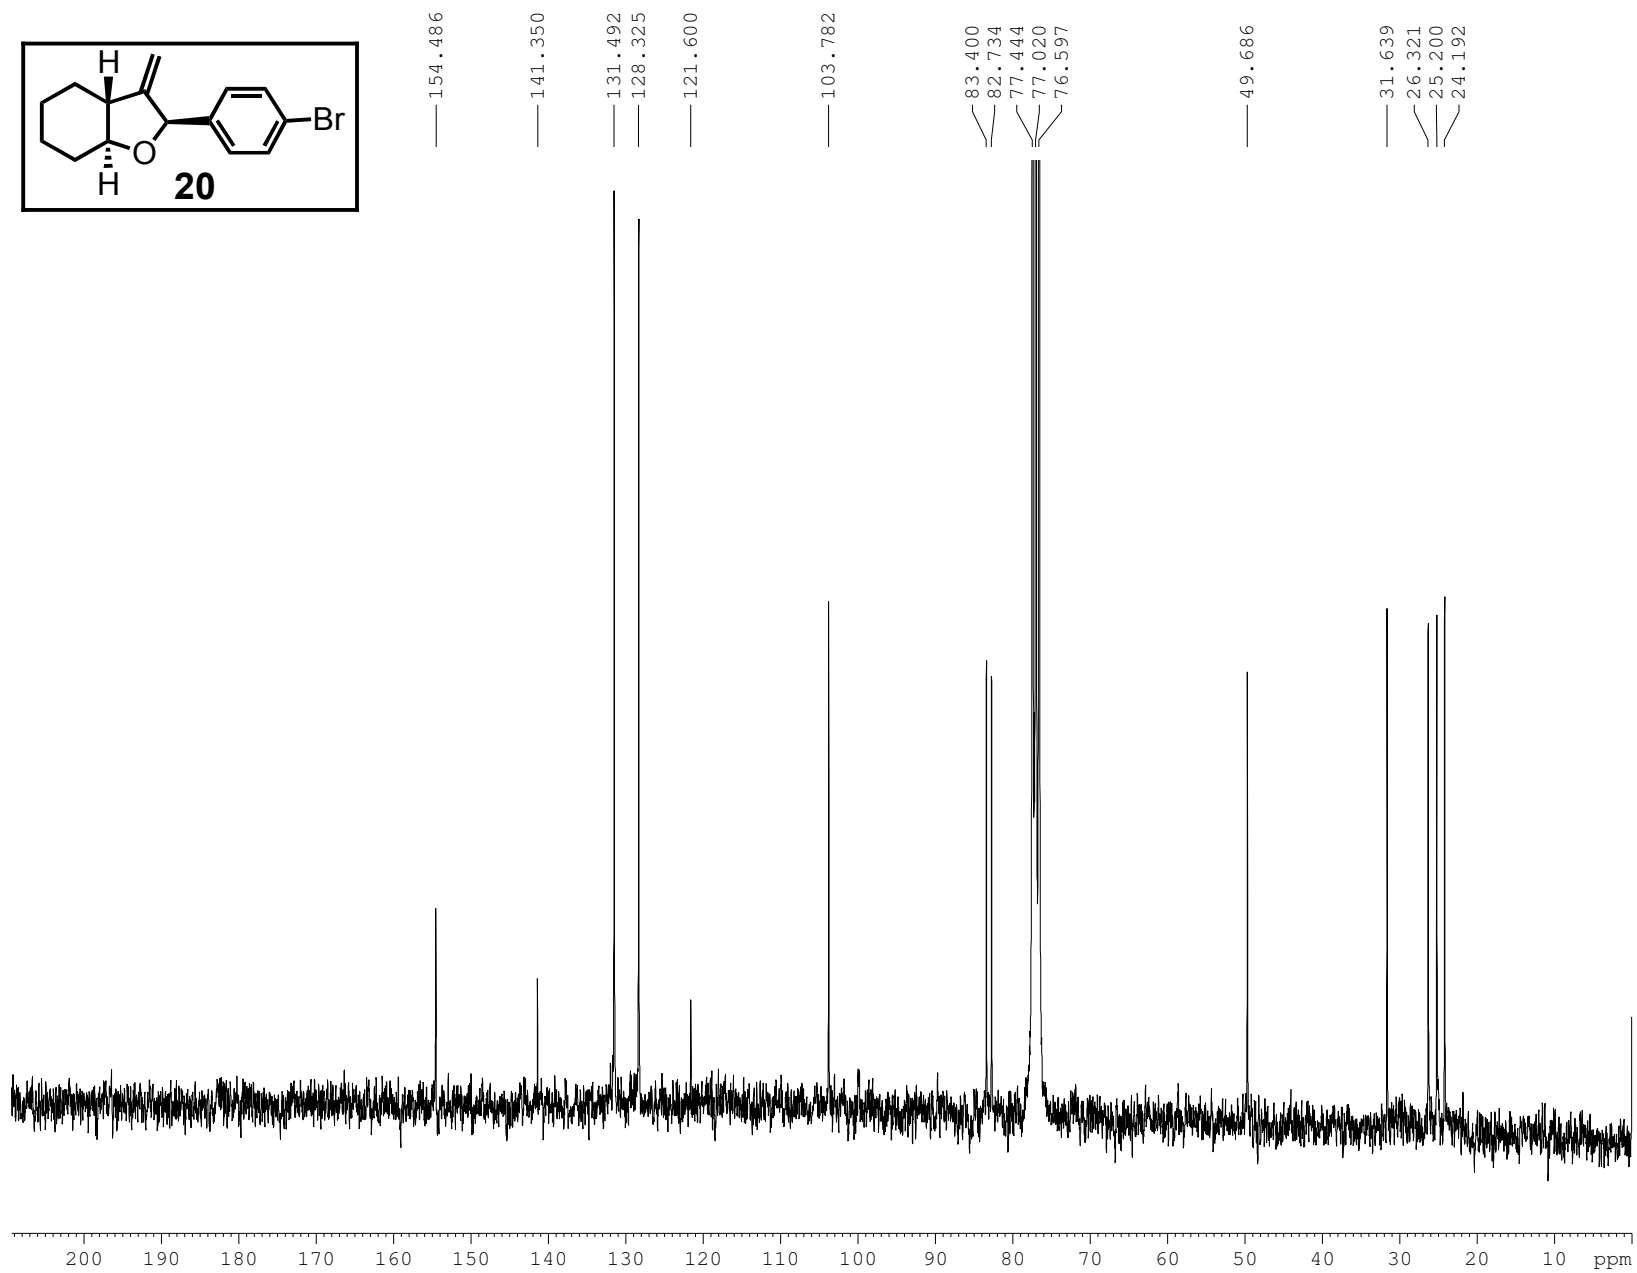

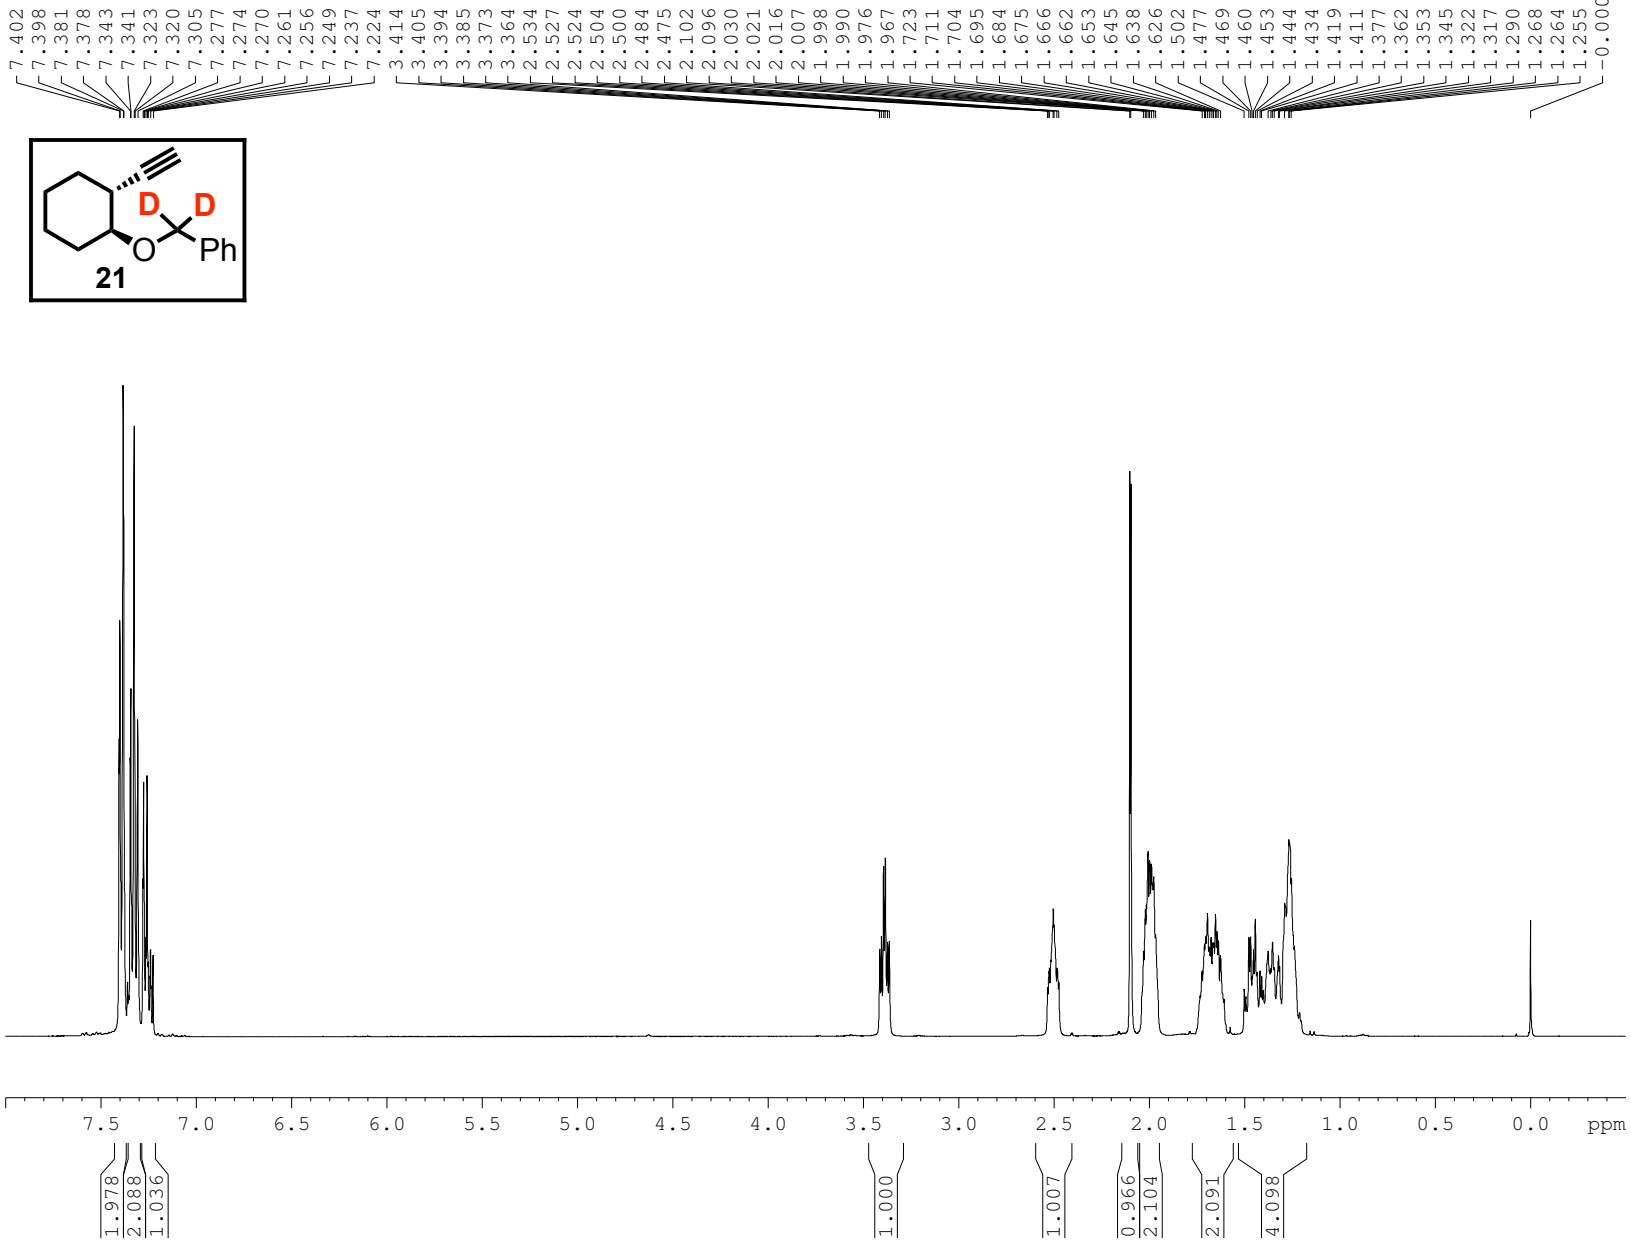

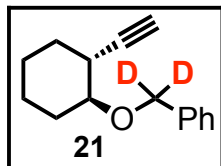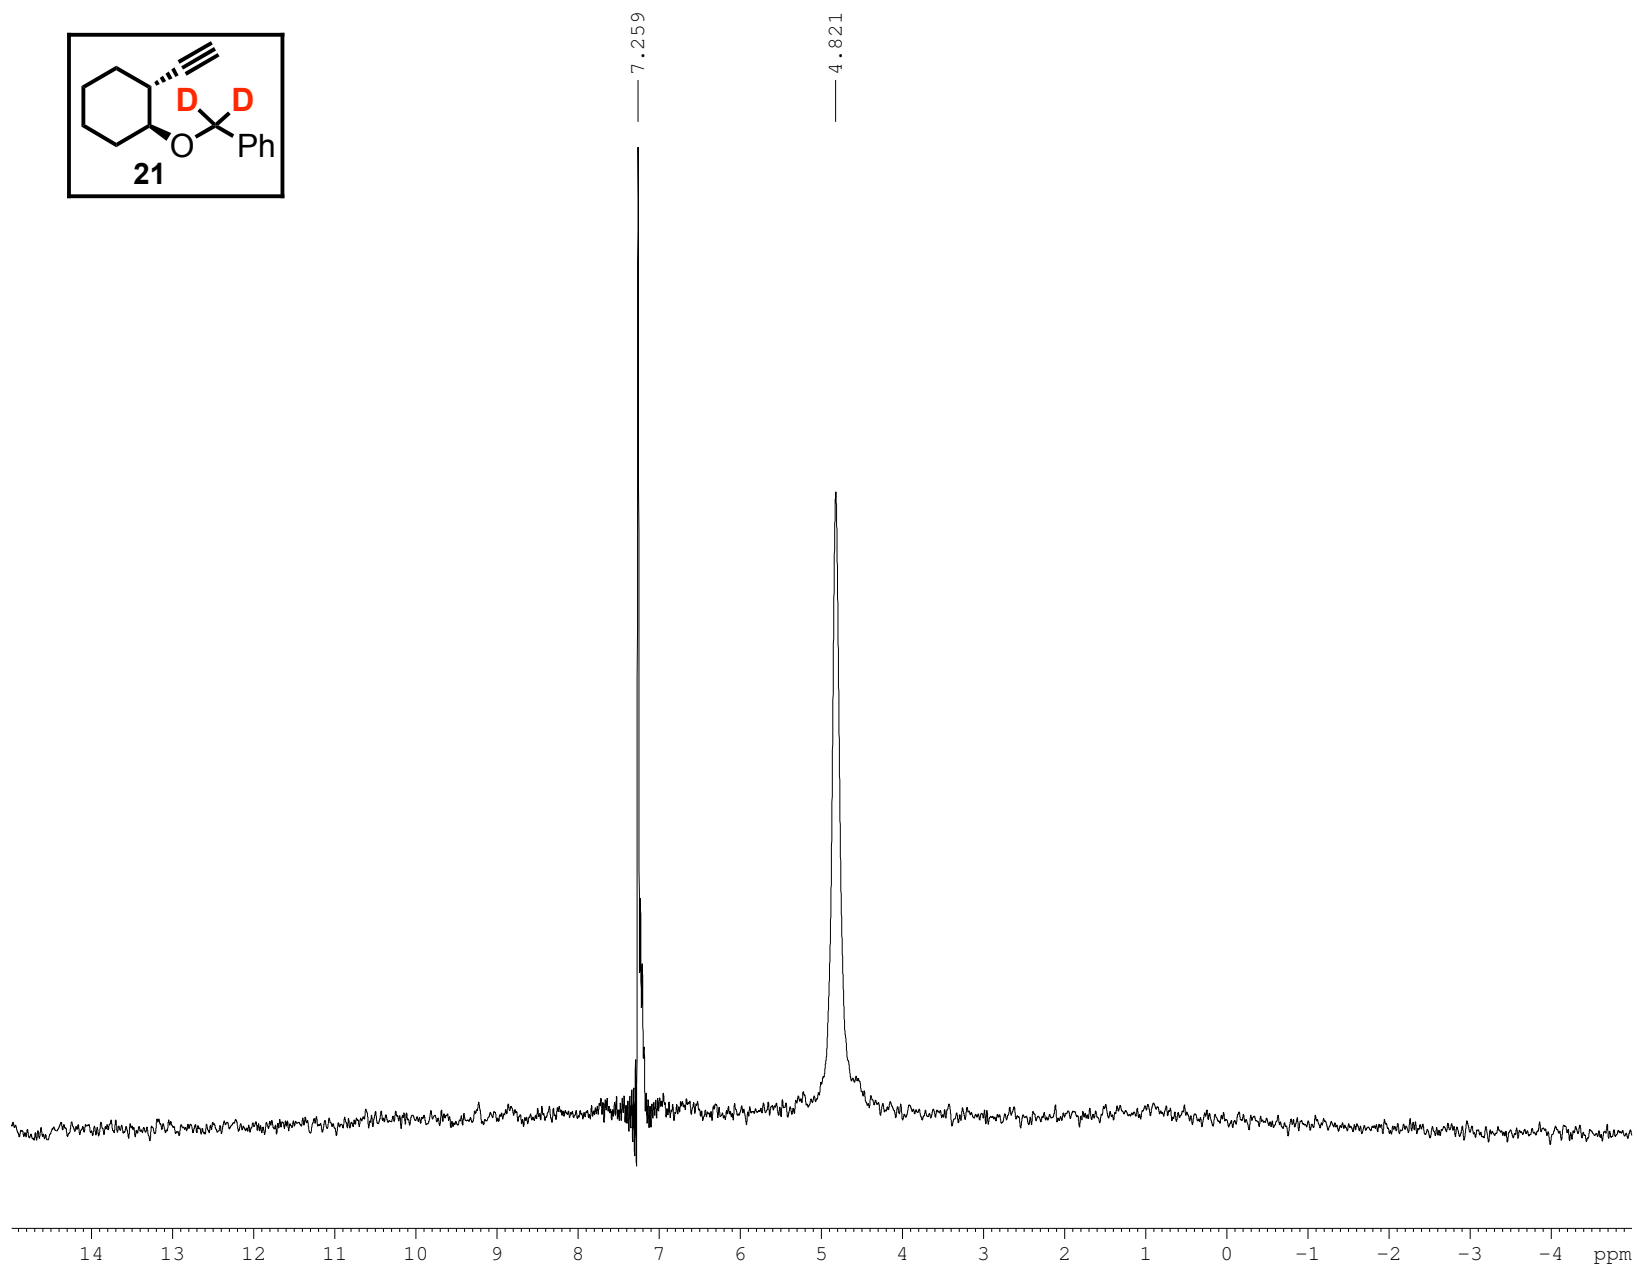



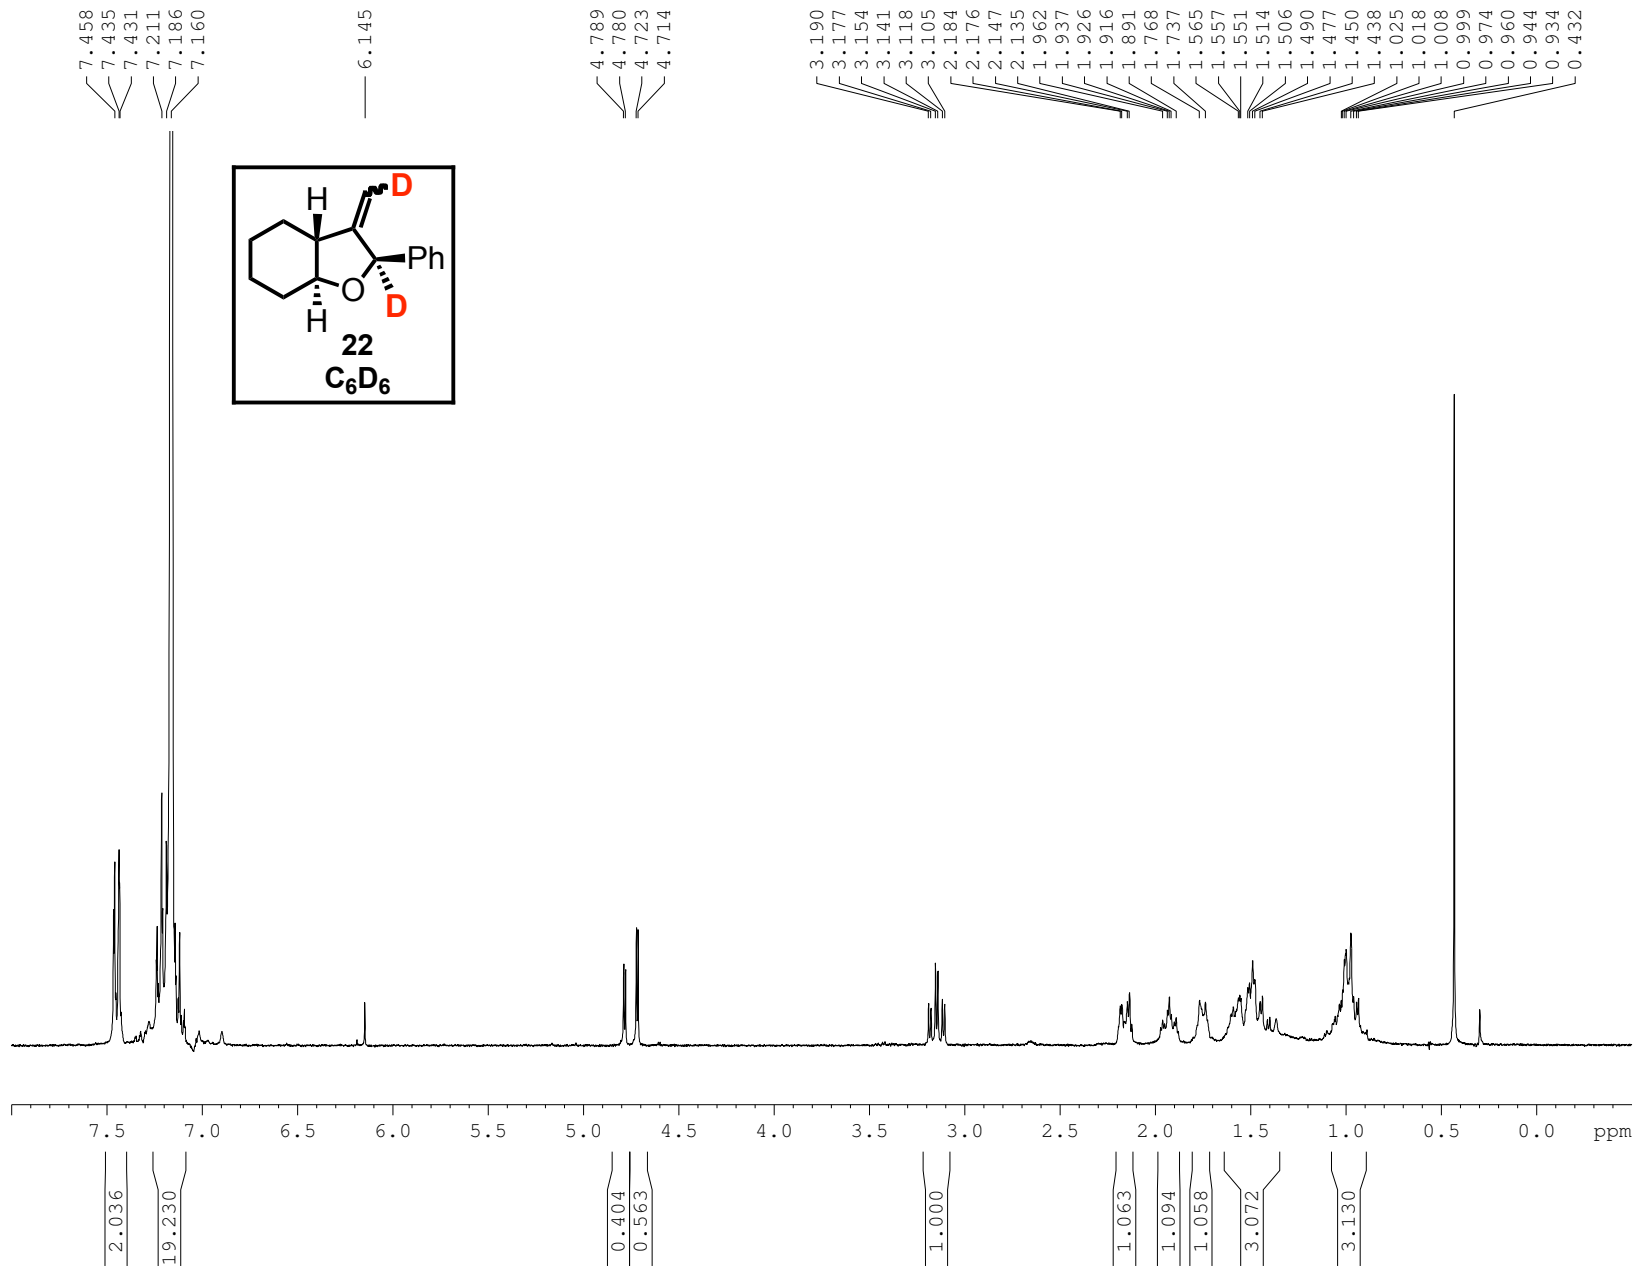

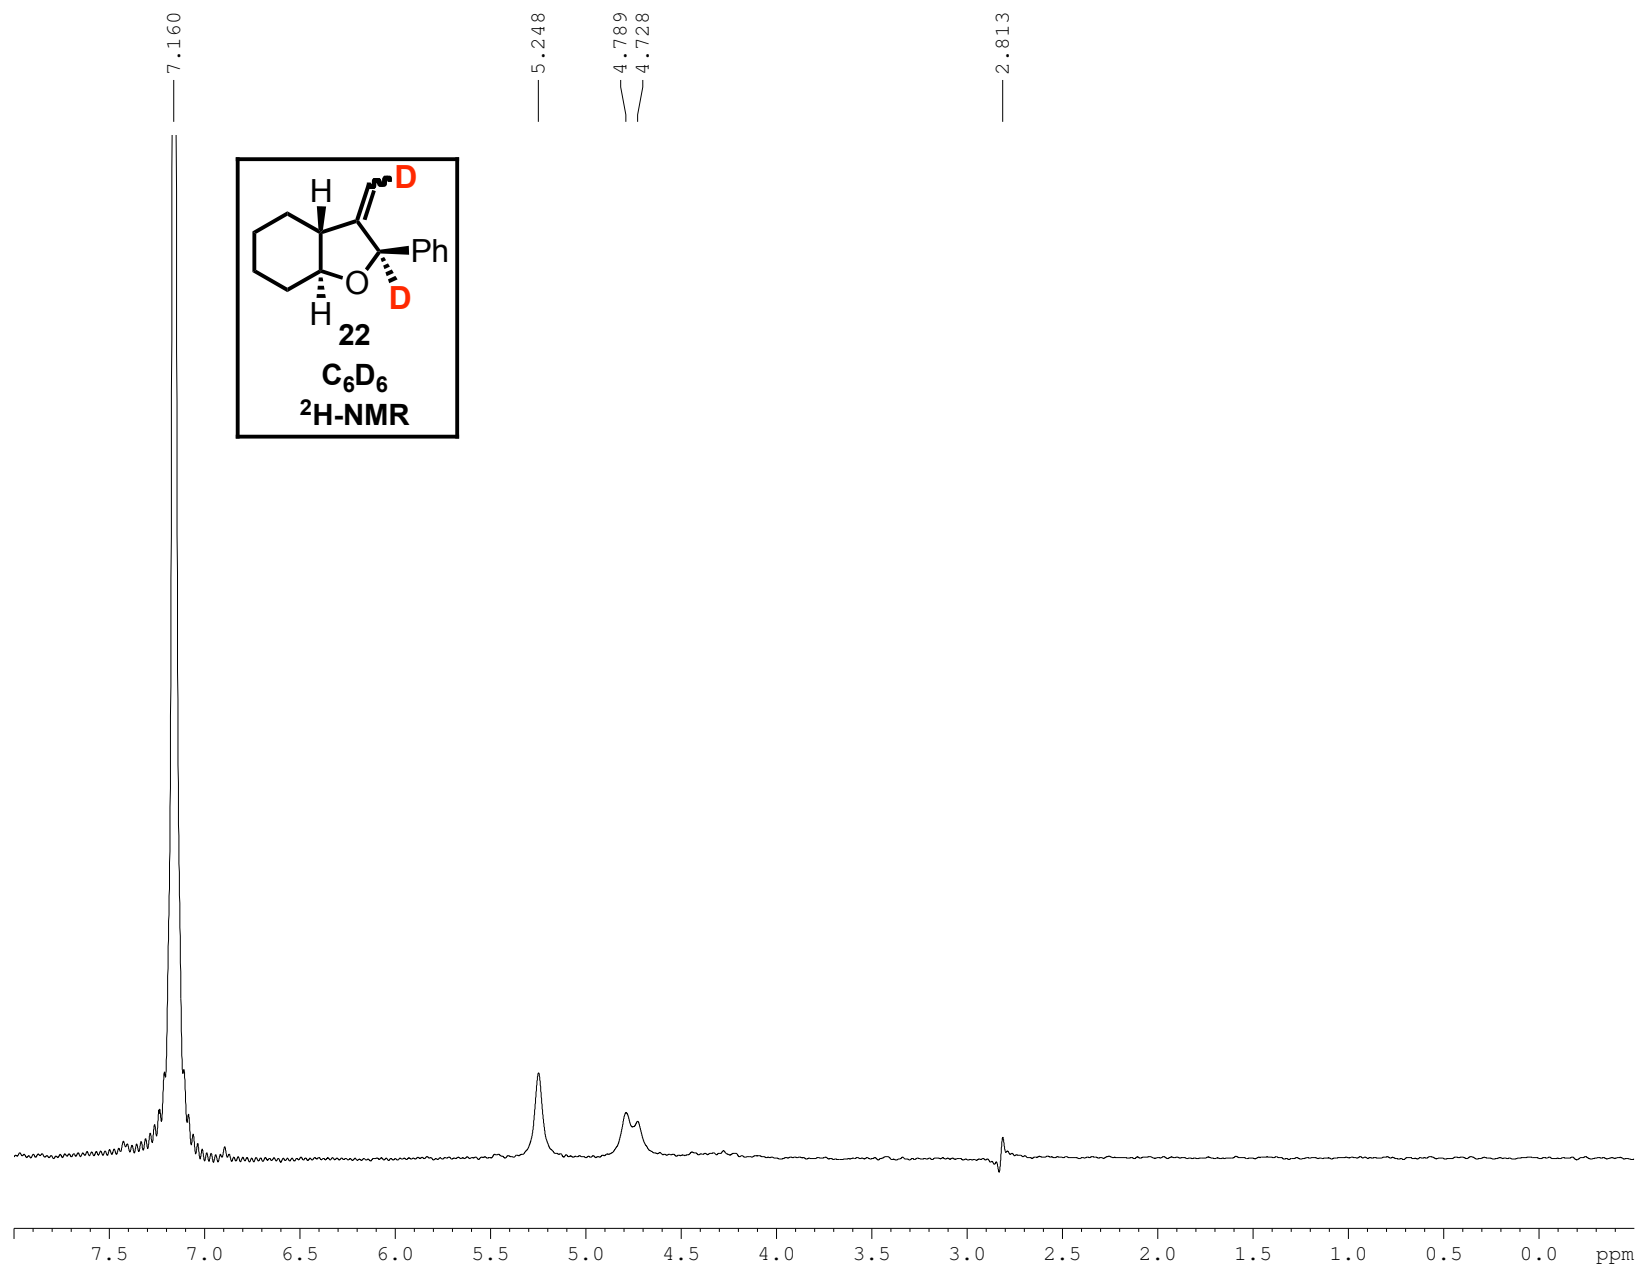

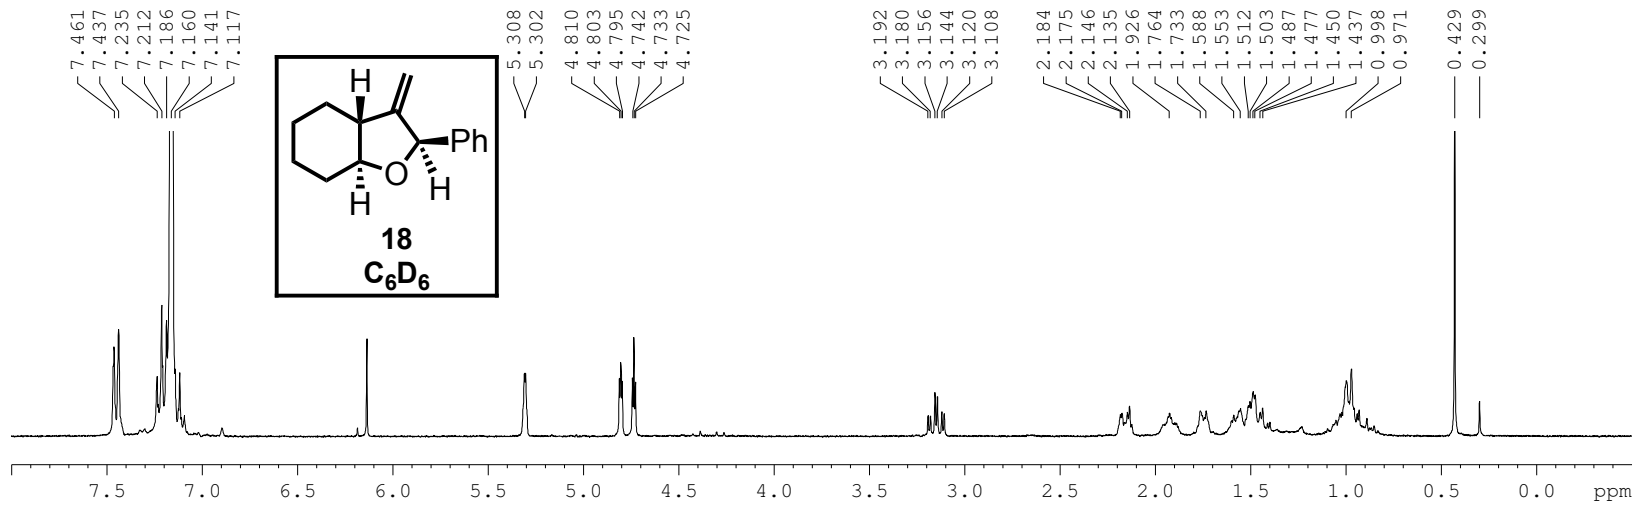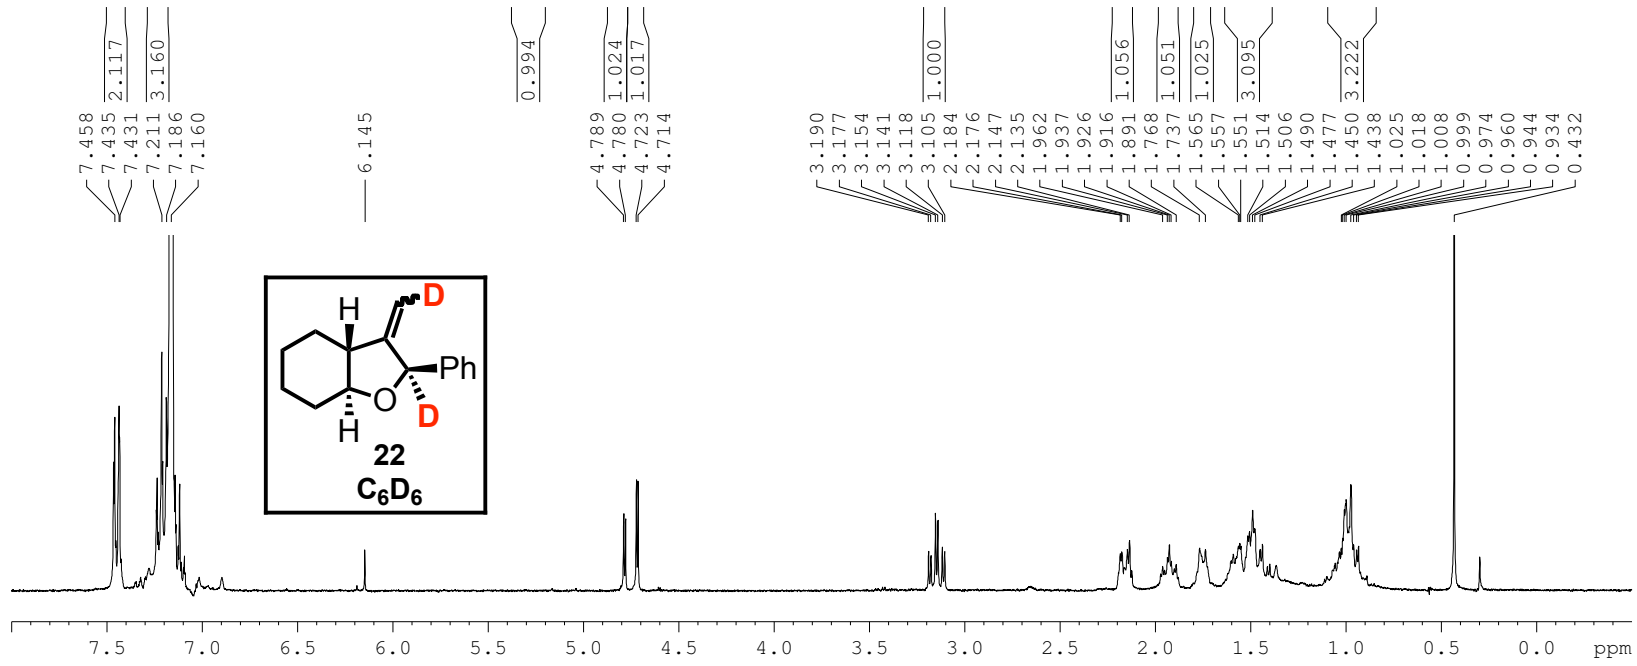

7.418  
7.413  
7.391  
7.363  
7.359  
7.336  
7.330  
7.311  
7.289  
7.266  
7.255

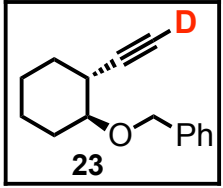

4.661

3.421  
3.405  
3.393  
3.378  
3.366  
2.545  
2.531  
2.514  
2.504  
2.487  
2.473  
2.115  
2.108  
2.026  
2.022  
2.013  
2.001  
1.706  
1.680  
1.675  
1.665  
1.491  
1.480  
1.459  
1.447  
1.306  
1.276  
1.267

0.000

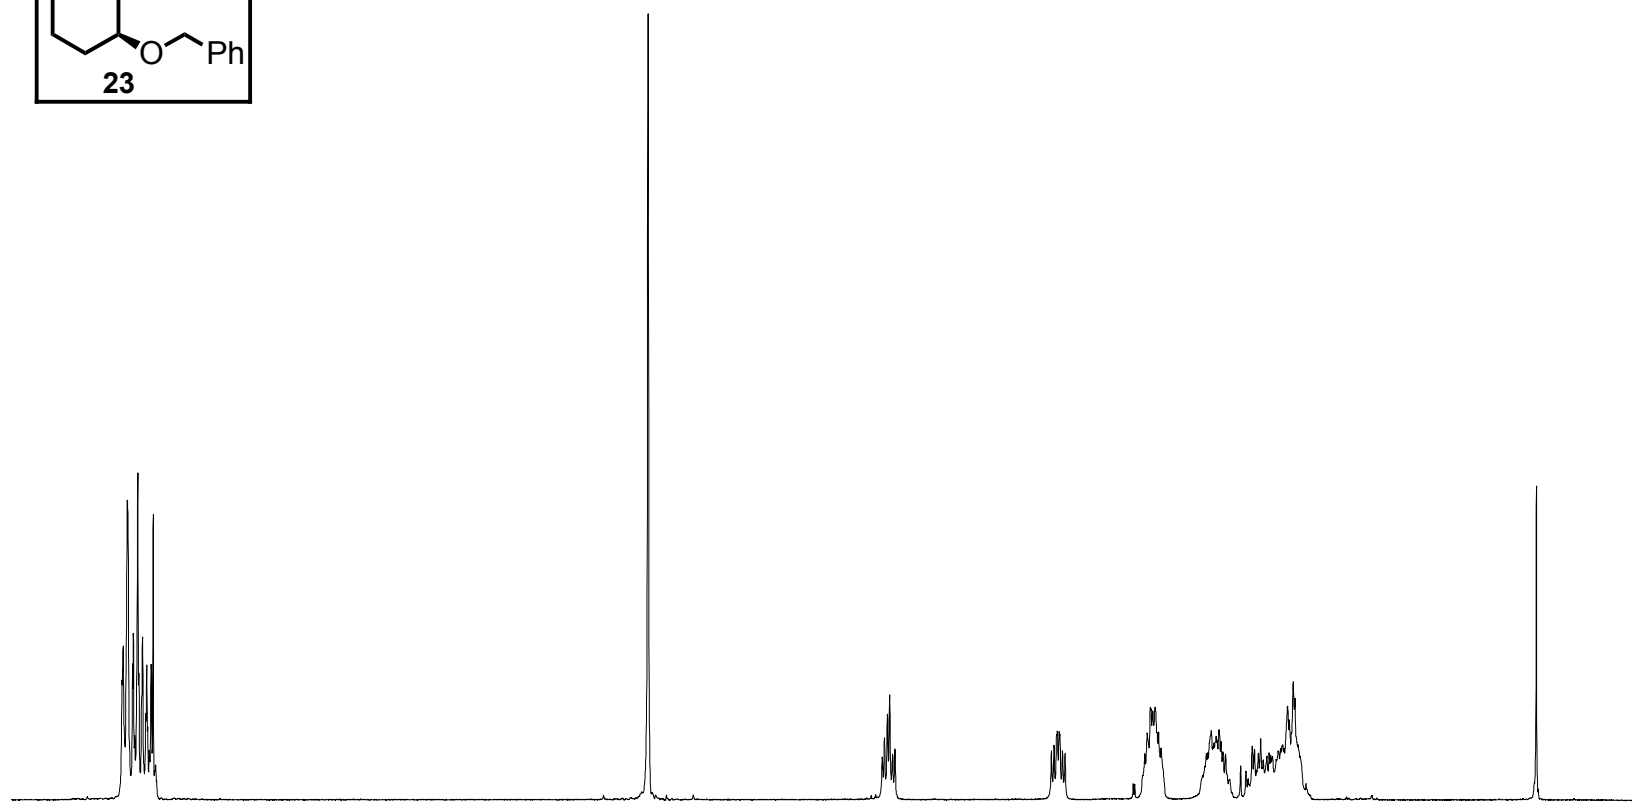

5.270

2.046

1.025

1.000

0.049

2.071

2.081

4.206

ppm

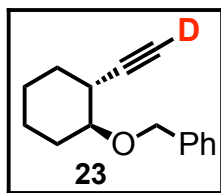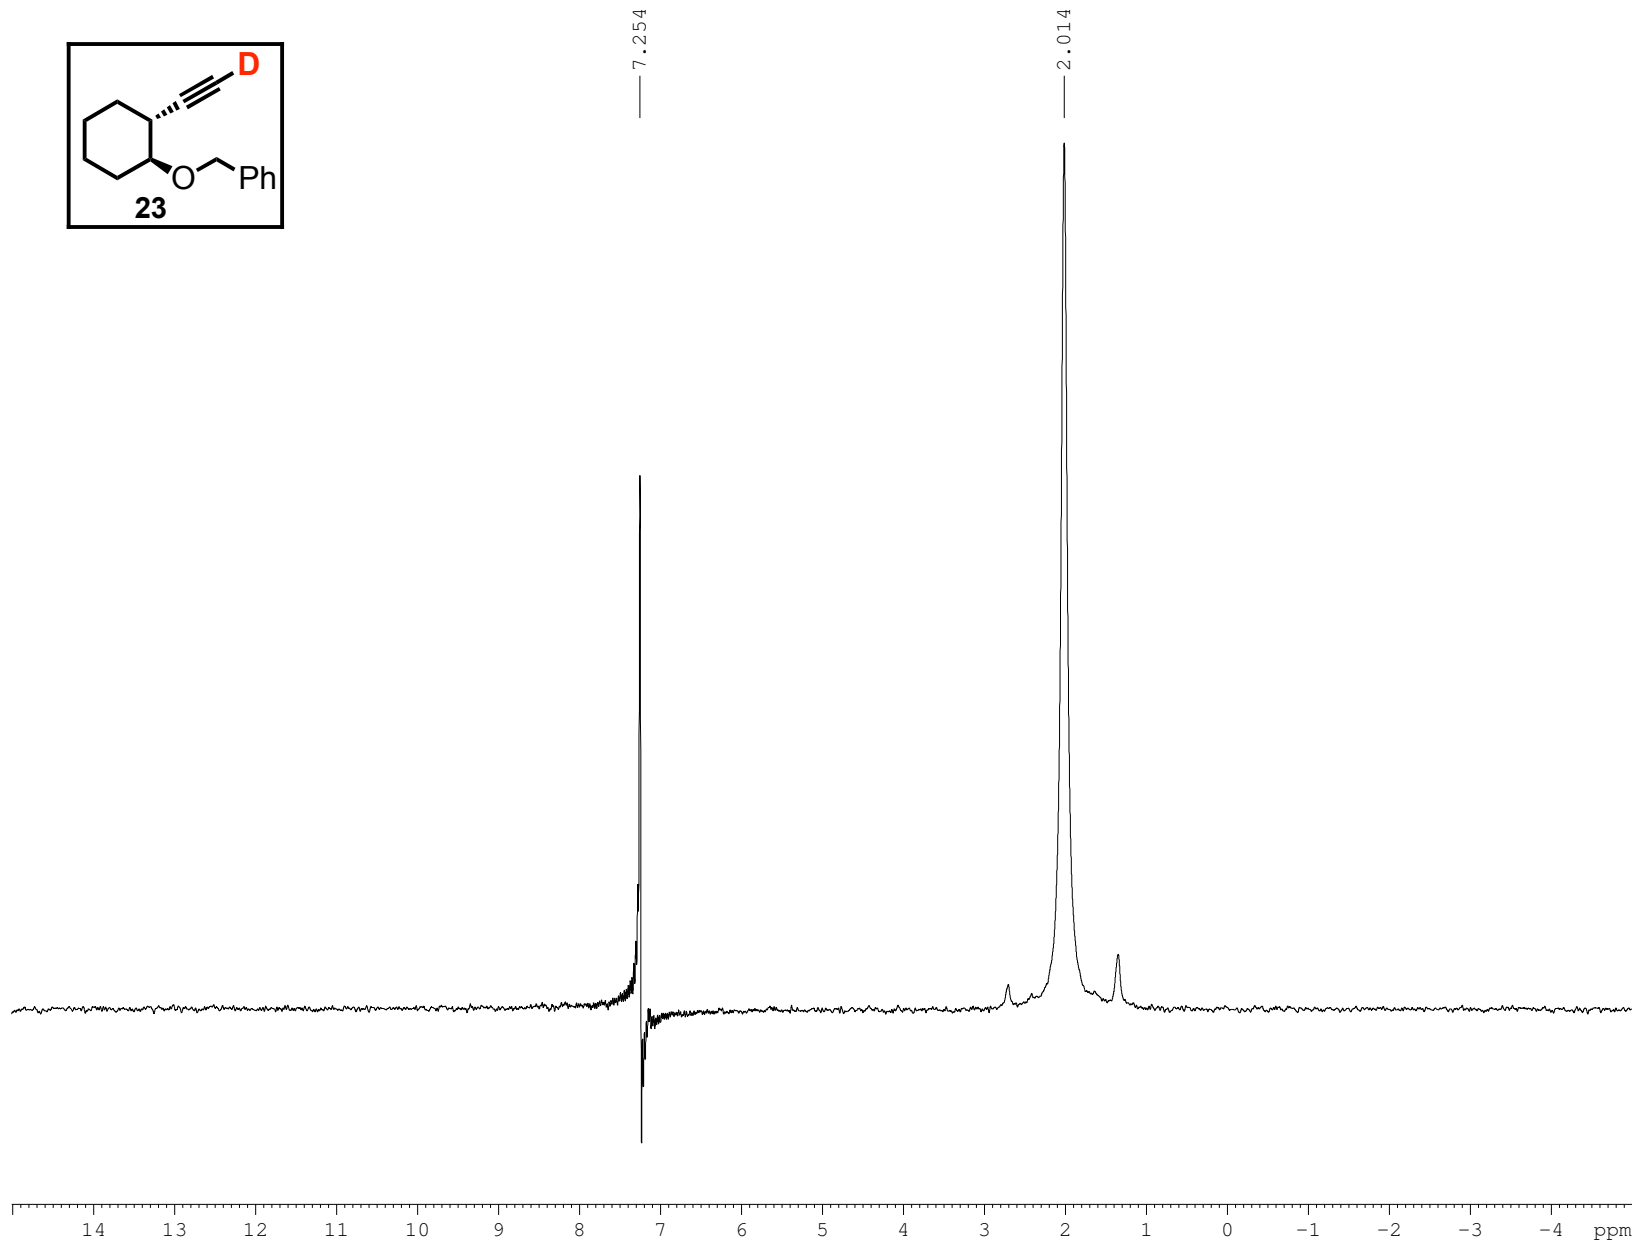

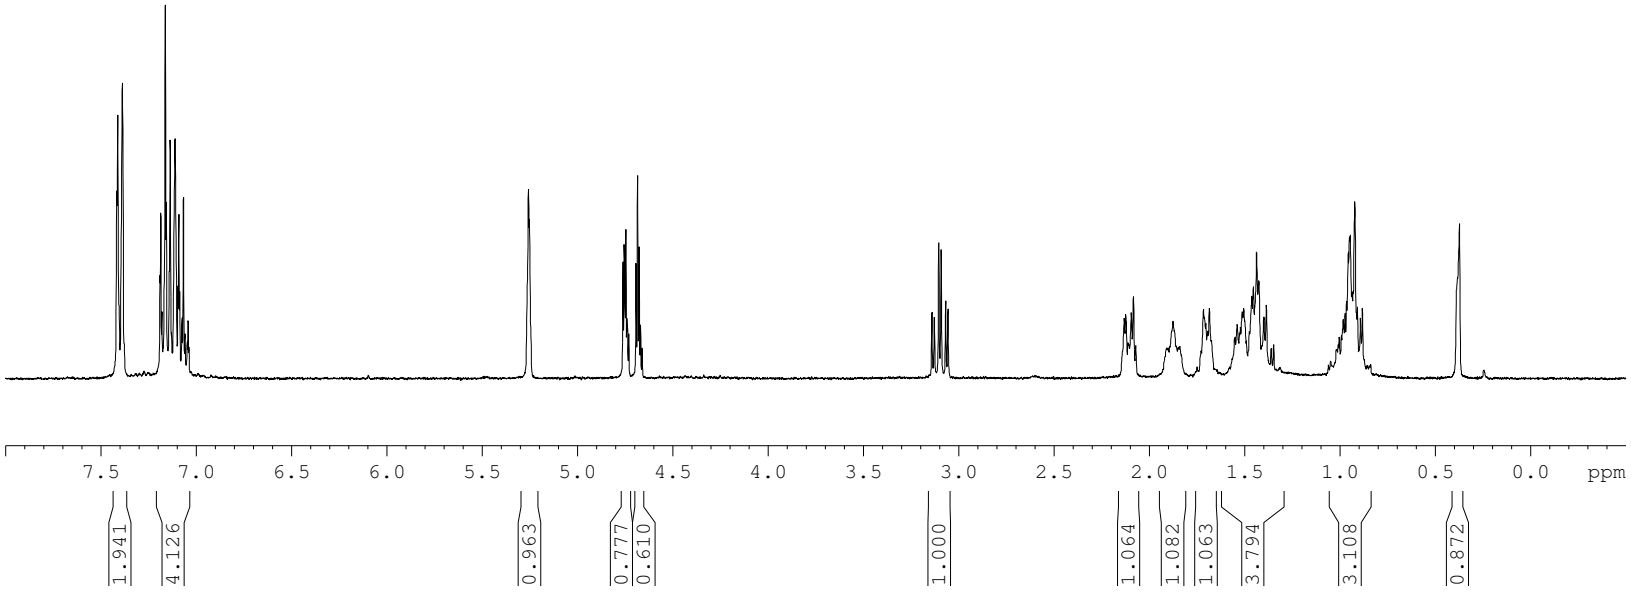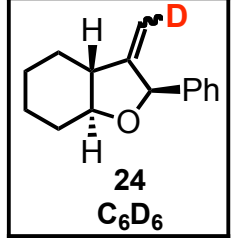

7.386  
7.188  
7.184  
7.178  
7.161  
7.156  
7.139  
7.135  
7.110  
7.094  
7.090  
7.085  
7.073  
7.066  
7.041

5.256  
5.250  
4.759  
4.753  
4.750  
4.744  
4.691  
4.683  
4.675

3.141  
3.129  
3.105  
3.093  
3.069  
3.057  
2.132  
2.124  
2.112  
2.095  
2.084  
2.072  
1.902  
1.877  
1.841  
1.716  
1.704  
1.693  
1.685  
1.540  
1.523  
1.513  
1.505  
1.463  
1.454  
1.438  
1.425  
1.399  
1.387  
0.983  
0.973  
0.966  
0.957  
0.951  
0.947  
0.937  
0.922  
0.909  
0.893

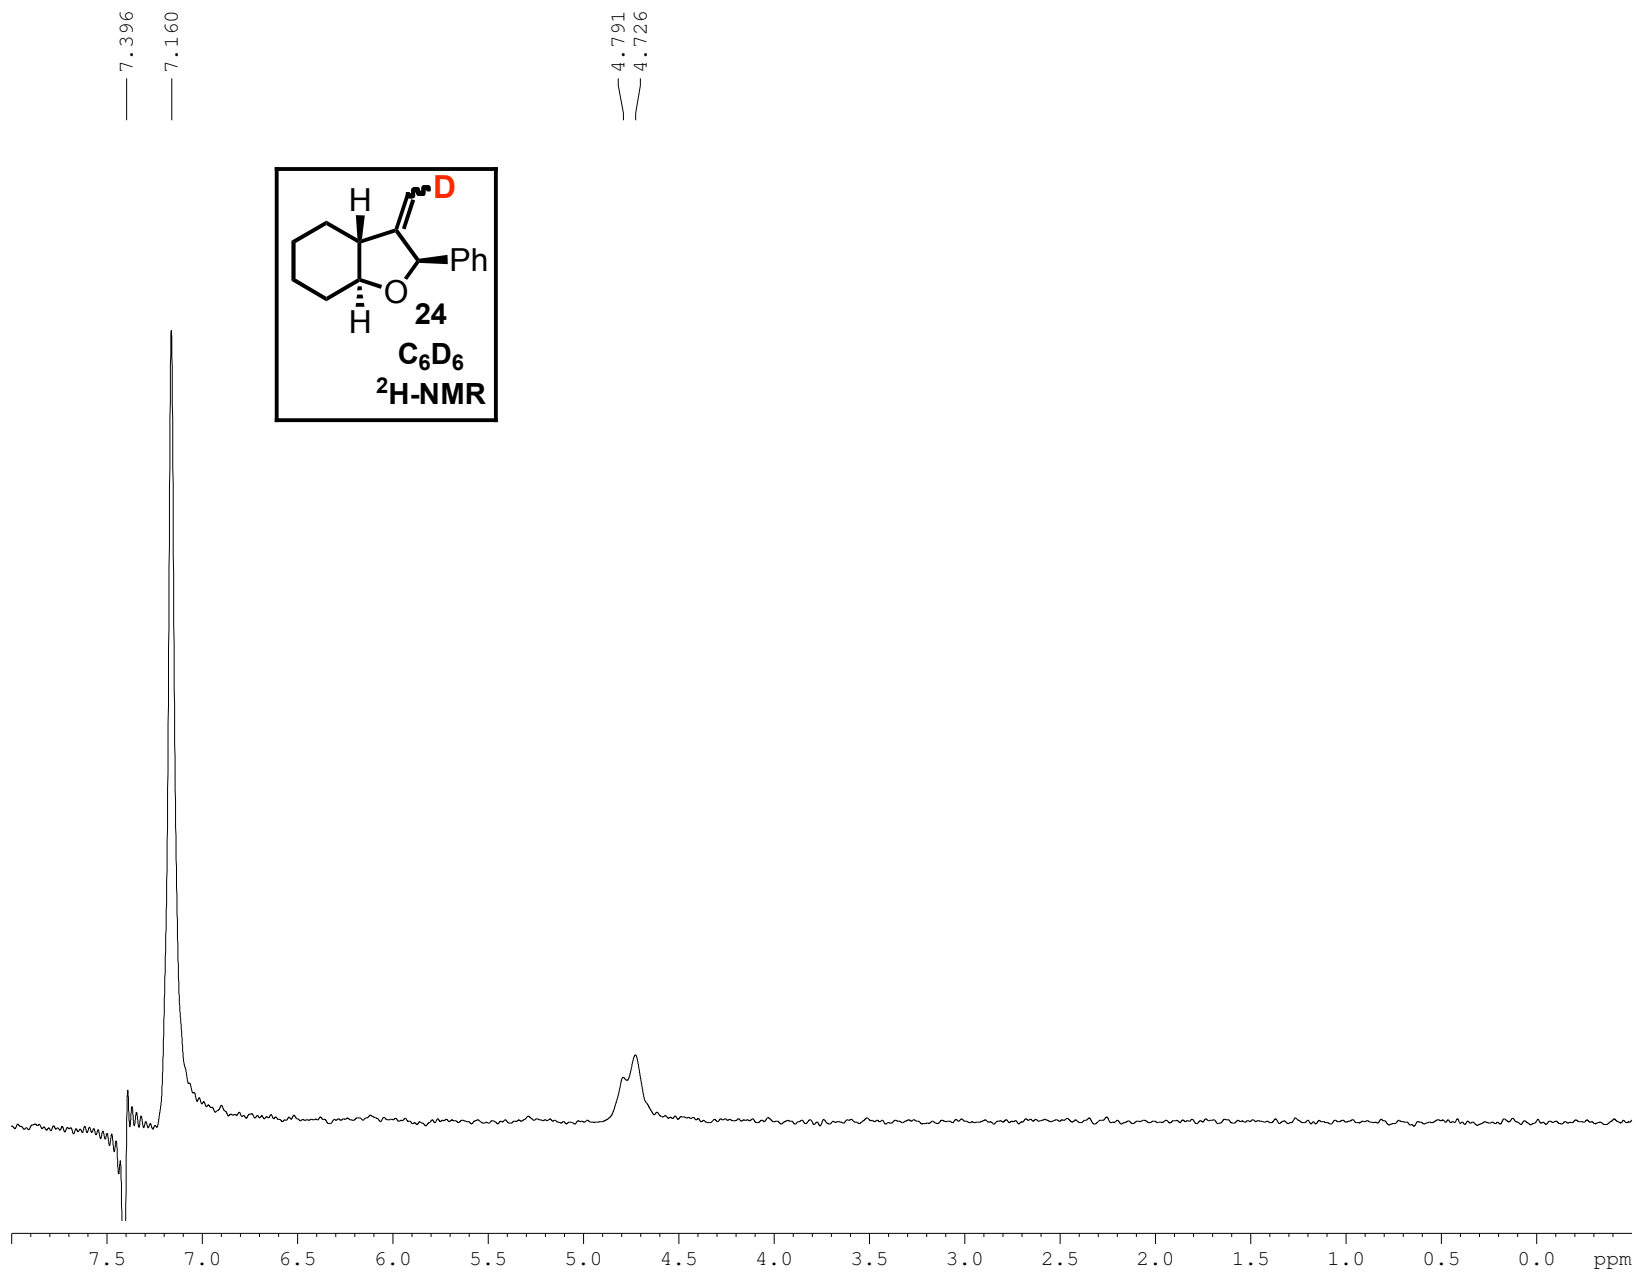

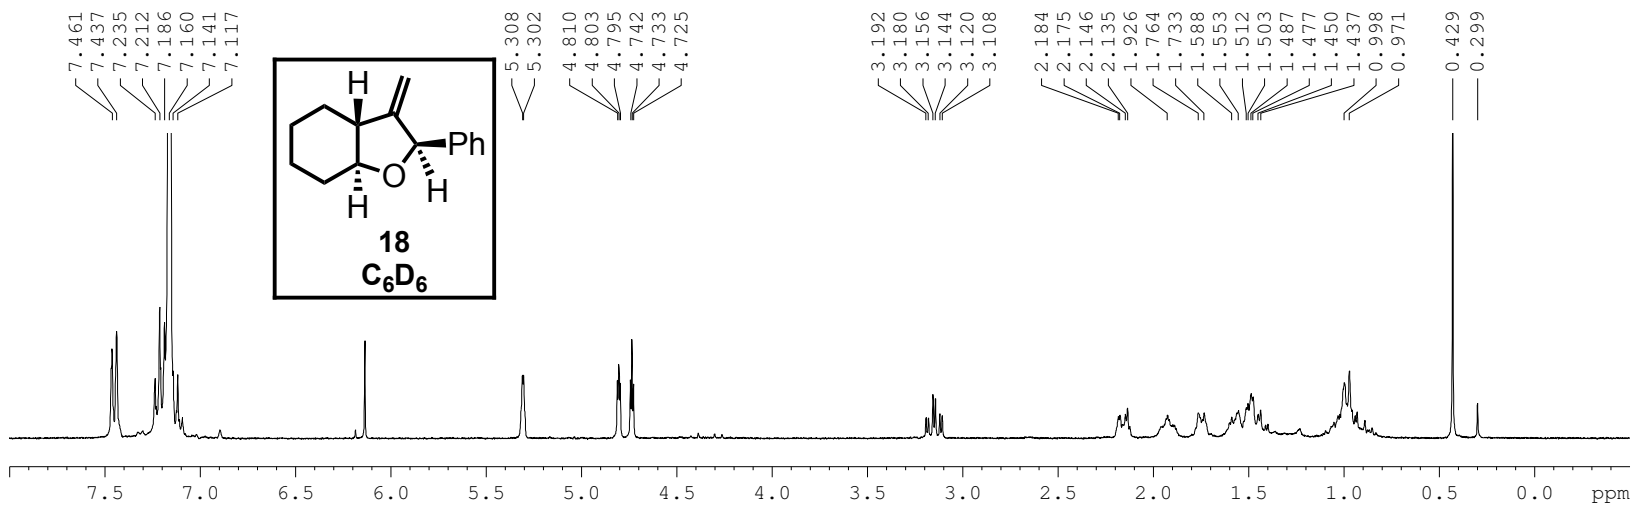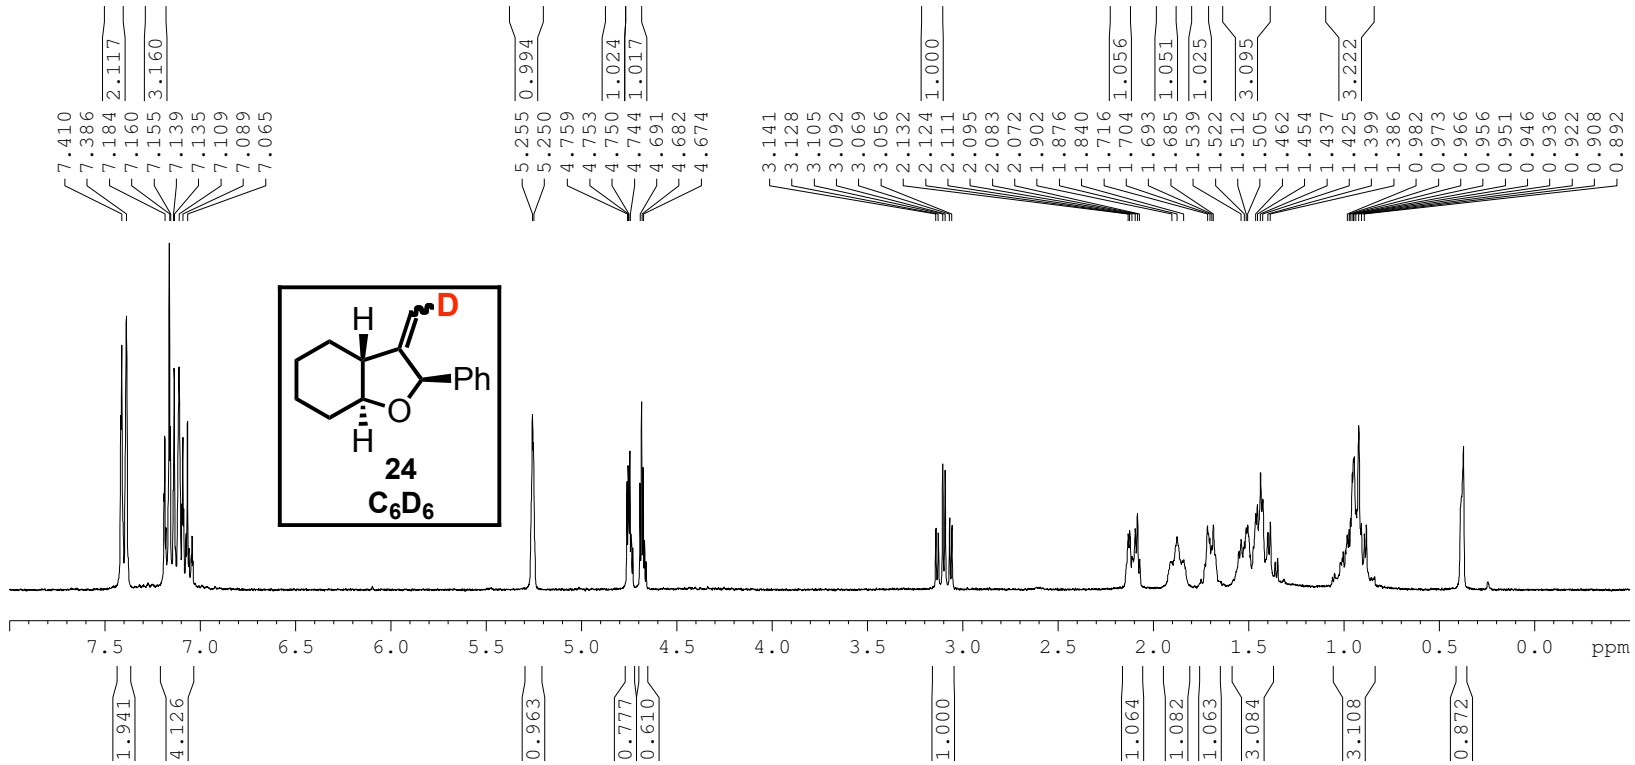

Supplement: NIHMS155046-supplement-2_si_002.pdf [file NIHMS155046-supplement-2_si_002.pdf]
